# Supplementary material for: Catalyst-free synthesis of isoxazolidine from nitrosoarene and haloalkyne via a 1,2-halo-migration/[3 + 2] cycloaddition cascade
Source: Royal Society of Chemistry journal article supplement (doi:10.1039/d1ob00421b), 2021-01-01

# Supplementary Information

## Catalyst-Free Synthesis of Isoxazolidine from Nitrosoarene and Haloalkyne via 1,2-Halo-Migration/[2+3] Cycloaddition Cascade

Shaotong Qiu,<sup>†</sup> Tongxiang Cao<sup>\*,†</sup> and Shifa Zhu<sup>\*,†,‡</sup>

<sup>†</sup>Key Laboratory of Functional Molecular Engineering of Guangdong Province and Guangdong Engineering Research Center for Green Fine Chemicals, School of Chemistry and Chemical Engineering, South China University of Technology, Guangzhou, 510640, China

[caotx@scut.edu.cn](mailto:caotx@scut.edu.cn)

[zhusf@scut.edu.cn](mailto:zhusf@scut.edu.cn)

### Table of content

|                                                                                        |    |
|----------------------------------------------------------------------------------------|----|
| 1. Optimization of reaction conditions.....                                            | 2  |
| 2. Attempts of other alkenes as trapping agents.....                                   | 2  |
| 3. Experimental procedures and spectroscopic data.....                                 | 2  |
| 3.1 General information.....                                                           | 2  |
| 3.2 Typical procedure for the synthesis of <b>4</b> .....                              | 3  |
| 3.3 Gram-Scale Reaction of <b>4a</b> .....                                             | 11 |
| 3.4 Isomerization reaction of <b>4a</b> to <b>Z-4a</b> .....                           | 11 |
| 3.5 Control Reactions.....                                                             | 11 |
| 3.6 Experimental procedures for the synthesis of compounds <b>5</b> and <b>6</b> ..... | 13 |
| 4. X-Ray diffraction analysis.....                                                     | 13 |
| 4.1 Crystal data and structure refinement for <b>Z-4s</b> .....                        | 13 |
| 4.2 Crystal data and structure refinement for <b>Z-5h</b> .....                        | 14 |
| 5. Copies of NMR spectrum.....                                                         | 16 |

## 1. Optimization of reaction conditions

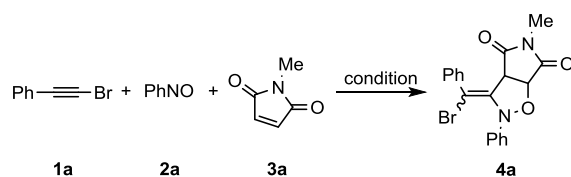

| entry           | catalyst     | solvent                                          | Temp. (°C) | <b>4a</b> yield (%) <sup>b</sup> | <b>Z:E</b>   |
|-----------------|--------------|--------------------------------------------------|------------|----------------------------------|--------------|
| 1               | -            | CHCl <sub>3</sub>                                | 40         | 40                               | 69:31        |
| 2               | TMSOTf (10%) | CHCl <sub>3</sub>                                | 40         | trace                            | -            |
| 3               | AcOH (50%)   | CHCl <sub>3</sub>                                | 40         | trace                            | -            |
| 4               | -            | H <sub>2</sub> O                                 | 40         | trace                            | -            |
| 5               | -            | CHCl <sub>3</sub> /H <sub>2</sub> O <sup>c</sup> | 40         | 71                               | 70:30        |
| 6               | -            | THF/H <sub>2</sub> O <sup>c</sup>                | 40         | 78                               | 75:25        |
| 7               | -            | DCE/H <sub>2</sub> O <sup>c</sup>                | 40         | 79                               | 71:29        |
| 8               | -            | Acetone/H <sub>2</sub> O <sup>c</sup>            | 40         | 50                               | 70:30        |
| 9               | -            | MeCN/H <sub>2</sub> O <sup>c</sup>               | 40         | 60                               | 68:32        |
| <b>10</b>       | -            | <b>EA/H<sub>2</sub>O<sup>c</sup></b>             | <b>40</b>  | <b>89<sup>d</sup></b>            | <b>69:31</b> |
| 11              | -            | EA/H <sub>2</sub> O <sup>c</sup>                 | 60         | 50                               | 69:31        |
| 12              | -            | EA/H <sub>2</sub> O <sup>c</sup>                 | rt         | 53                               | 71:29        |
| 13 <sup>e</sup> | -            | EA/H <sub>2</sub> O <sup>c</sup>                 | 40         | 72                               | 70:30        |
| 14              | -            | EA                                               | 40         | 52                               | 75:25        |

<sup>a</sup>Unless otherwise noted, the reaction was performed with **1a** (0.4 mmol), **2a** (0.6 mmol) and **3a** (0.2 mmol) for 11 h, under N<sub>2</sub> atmosphere. <sup>b</sup>The yield was determined by <sup>1</sup>H NMR using CH<sub>3</sub>NO<sub>2</sub> as an internal standard. <sup>c</sup>Organic solvent : H<sub>2</sub>O = 3:1. <sup>d</sup>isolated yield. <sup>e</sup> under air atmosphere.

## 2. Attempts of other alkenes as trapping agents

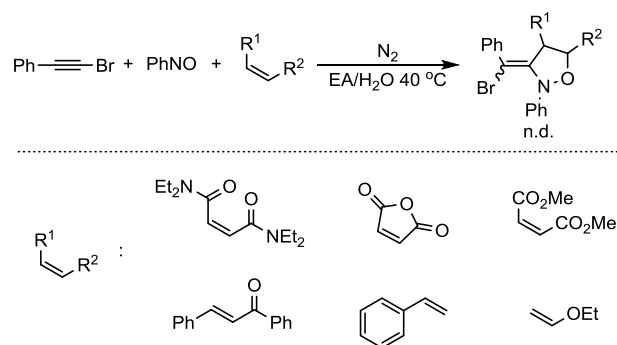

## 3. Experimental procedures and spectroscopic data

### 3.1 General information

All reactions were carried out under an inert atmosphere of dry N<sub>2</sub> in Schlenk tube, solvents were

purified by standard method.  $^1\text{H}$ ,  $^{13}\text{C}$ ,  $^{19}\text{F}$  NMR spectra were recorded on either a Bruker AVANCE 400 (400 MHz for  $^1\text{H}$ ; 101 MHz for  $^{13}\text{C}$ ; 376 MHz for  $^{19}\text{F}$ ) or Bruker AVANCE 500 (500 MHz for  $^1\text{H}$ ; 126 MHz for  $^{13}\text{C}$ ).  $^1\text{H}$  NMR and  $^{13}\text{C}$  NMR chemical shifts were determined relative to internal standard TMS at  $\delta$  0.0 and  $^{19}\text{F}$  NMR chemical shifts were determined relative to  $\text{CFCl}_3$  as external standard. Chemical shifts ( $\delta$ ) are reported in ppm, and coupling constants ( $J$ ) are in Hertz (Hz). The following abbreviations were used to explain the multiplicities: s = singlet, d = doublet, t = triplet, q = quartet, m = multiplet, br = broad. Infrared (IR) spectra are recorded on a Nicolet 210 spectrophotometer and were recorded in potassium bromide (KBr) pellet. Mass spectra (MS) were obtained using ESI mass spectrometer. Melting points were determined using a hot stage apparatus. All reagents were used as received from commercial sources, unless specified otherwise, or prepared as described in the literature.

### 3.2 Typical procedure for the synthesis of 4

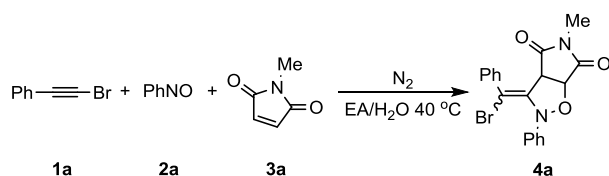

In a Schlenk tube with a magnetic bar under nitrogen atmosphere, EA (1 ml),  $\text{H}_2\text{O}$  (0.3 ml), the substrates of bromoalkyne **1a** (72 mg, 0.4 mmol), nitrosobenzene **2a** (64 mg, 0.6 mmol) and maleimide **3a** (22 mg, 0.2 mmol) were added. The mixture was stirred at 40 °C for 11 h until the substrate **3a** was completely consumed. After adding  $\text{Na}_2\text{SO}_4$  to remove water, the mixture was washed by EA for three times. The combined organic solvent was evaporated by rotary evaporator, and the residue was purified by flash column chromatography on silica gel using EtOAc/petroleum ether as eluent to afford the product **4a** (71 mg, 0.18 mmol).

The procedures of other substrates **1**, nitrosobenzenes **2** and maleimide **3**, were similar with that mentioned above.

#### 3-(bromo(phenyl)methylene)-5-methyl-2-phenyltetrahydro-4H-pyrrolo[3,4-d]isoxazole-4,6(5H)-dione (**4a**)

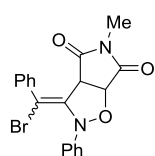

89% yield (71 mg, Z:E = 69:31), single Z-isomer (64 mg) could be obtained after silica gel isomerization at 40 °C, yellow solid (Z-isomer), m. p. (Z-isomer) 119-120 °C,  $R_f$  (Z-isomer) = 0.45 (EtOAc/petroleum ether = 1/3),  $R_f$  (E-isomer) = 0.45 (EtOAc/petroleum ether = 1/3);  $^1\text{H}$  NMR (400 MHz,  $\text{CDCl}_3$ ) for Z-isomer:  $\delta$  8.00 – 7.85 (m, 2H), 7.41 – 7.36 (m, 3H), 7.26 – 7.14 (m, 2H), 7.07 (d,  $J$  = 8.0 Hz, 2H), 6.95 (t,  $J$  = 7.3 Hz, 1H), 4.84 (d,  $J$  = 7.1 Hz, 1H), 4.13 (d,  $J$  = 7.1 Hz, 1H), 2.33 (s, 3H);  $^{13}\text{C}$  NMR (101 MHz,  $\text{CDCl}_3$ ) for Z-isomer:  $\delta$  172.6, 172.1, 145.7, 136.6, 136.4, 130.0, 129.4, 129.1, 128.5, 124.4, 121.1, 115.7, 77.6, 50.46, 24.9;  $^1\text{H}$  NMR (400 MHz,  $\text{CDCl}_3$ ) for E-isomer:  $\delta$  7.66 (d,  $J$  = 7.7 Hz, 2H), 7.49 - 6.99 (7H), 6.92 (t,  $J$  = 7.3 Hz, 1H), 4.98 (d,  $J$  = 7.2 Hz, 1H), 4.77 (d,  $J$  = 7.2 Hz, 1H), 2.41 (s, 3H); IR (KBr,  $\text{cm}^{-1}$ ) for Z-isomer: 3777, 3709, 3664, 3639, 3601, 3176, 1810, 1725, 1668, 1585, 585, 479, 405; HRMS (ESI) Calcd for  $\text{C}_{19}\text{H}_{16}\text{BrN}_2\text{O}_3$  ( $\text{M}+\text{H}$ ) $^+$  399.0339, found 399.0336.

**3-(bromo(phenyl)methylene)-5-(tert-butyl)-2-phenyltetrahydro-4H-pyrrolo[3,4-d]isoxazole-4,6(5H)-dione (4b)**

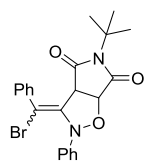

76% yield (67 mg, Z:E = 72:28), yellow solid (Z+E mixture), m. p. (Z+E mixture) 121-125 °C,  $R_f$  (Z+E mixture) = 0.4 (EtOAc/petroleum ether = 1/3);  $^1\text{H NMR}$  (400 MHz,  $\text{CDCl}_3$ ) for Z-isomer:  $\delta$  7.98 (d,  $J$  = 6.7 Hz, 2H), 7.48 – 6.89 (8H), 4.73 (d,  $J$  = 7.4 Hz, 1H), 4.06 (d,  $J$  = 7.4 Hz, 1H), 1.09 (s, 9H);  $^{13}\text{C NMR}$  (101 MHz,  $\text{CDCl}_3$ ) for Z-isomer:  $\delta$  173.5, 172.7, 146.0, 136.8, 136.7, 129.9, 129.5, 129.2, 128.5, 124.1, 120.9, 115.7, 77.3, 59.5, 50.3, 27.3;  $^1\text{H NMR}$  (400 MHz,  $\text{CDCl}_3$ ) for E-isomer:  $\delta$  7.71 (d,  $J$  = 7.4 Hz, 2H), 7.48 – 6.89 (8H), 4.82 (d,  $J$  = 7.7 Hz, 1H), 4.63 (d,  $J$  = 7.7 Hz, 1H), 1.11 (s, 9H); IR (Z+E mixture, KBr,  $\text{cm}^{-1}$ ) 3671, 3063, 2978, 1780, 1712, 1595, 1538, 1487, 1446, 1336, 1263, 1169, 756, 694; HRMS (ESI) Calcd for  $\text{C}_{22}\text{H}_{22}\text{BrN}_2\text{O}_3$  ( $\text{M}+\text{H}$ ) $^+$  441.0808, found 441.0804.

**3-(bromo(phenyl)methylene)-5-ethyl-2-phenyltetrahydro-4H-pyrrolo[3,4-d]isoxazole-4,6(5H)-dione (4c)**

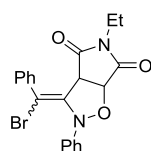

78% yield (64 mg, Z:E = 72:28), yellow solid (Z+E mixture), m. p. (Z+E mixture) 85-88 °C,  $R_f$  (Z+E mixture) = 0.4 (EtOAc/petroleum ether = 1/3);  $^1\text{H NMR}$  (400 MHz,  $\text{CDCl}_3$ ) for Z-isomer:  $\delta$  8.10 – 7.94 (m, 2H), 7.53 – 6.80 (8H), 4.89 (d,  $J$  = 7.2 Hz, 1H), 4.17 (d,  $J$  = 7.2 Hz, 1H), 3.10 (q,  $J$  = 7.2 Hz, 2H), 0.40 (t,  $J$  = 7.2 Hz, 3H);  $^{13}\text{C NMR}$  (101 MHz,  $\text{CDCl}_3$ ) for Z-isomer:  $\delta$  172.3, 171.8, 145.8, 136.6, 136.2, 130.0, 129.4, 129.2, 128.5, 124.3, 121.3, 115.5, 77.7, 50.5, 34.4, 11.1;  $^1\text{H NMR}$  (400 MHz,  $\text{CDCl}_3$ ) for E-isomer:  $\delta$  7.70 (d,  $J$  = 7.3 Hz, 2H), 7.53 – 6.80 (8H), 4.97 (d,  $J$  = 7.4 Hz, 1H), 4.75 (d,  $J$  = 7.4 Hz, 1H), 3.10 (q,  $J$  = 7.2 Hz, 2H), 0.40 (t,  $J$  = 7.2 Hz, 3H); IR (Z+E mixture, KBr,  $\text{cm}^{-1}$ ) 3477, 3361, 3063, 2983, 2943, 2882, 1784, 1714, 1591, 1488, 1449, 1393, 1347, 1229, 749, 697; HRMS (ESI) Calcd for  $\text{C}_{20}\text{H}_{18}\text{BrN}_2\text{O}_3$  ( $\text{M}+\text{H}$ ) $^+$  413.0495, found 413.0486.

**3-(bromo(phenyl)methylene)-2,5-diphenyltetrahydro-4H-pyrrolo[3,4-d]isoxazole-4,6(5H)-dione (4d)**

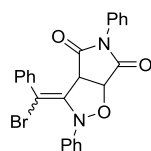

85% yield (78 mg, Z:E = 74:26), yellow solid (Z+E mixture), m. p. (Z+E mixture) 147-149 °C,  $R_f$  (Z+E mixture) = 0.4 (EtOAc/petroleum ether = 1/3);  $^1\text{H NMR}$  (400 MHz,  $\text{CDCl}_3$ ) for Z-isomer:  $\delta$  7.99 (d,  $J$  = 6.9 Hz, 2H), 7.49 – 6.91 (11H), 6.32 (d,  $J$  = 7.4 Hz, 2H), 5.02 (d,  $J$  = 7.3 Hz, 1H), 4.32 (d,  $J$  = 7.3 Hz, 1H);  $^{13}\text{C NMR}$  (101 MHz,  $\text{CDCl}_3$ ) for Z-isomer:  $\delta$  171.8, 171.3, 146.0, 136.5, 136.3, 130.8, 130.1, 129.6, 129.5, 129.11, 129.07, 128.6, 126.1, 124.5, 121.6, 115.8, 77.8, 50.6;  $^1\text{H NMR}$  (400 MHz,  $\text{CDCl}_3$ ) for E-isomer:  $\delta$  7.70 (d,  $J$  = 7.6 Hz, 2H), 7.52 – 6.93 (11H), 6.37 (d,  $J$  = 7.2 Hz, 2H), 5.10 (d,  $J$  = 7.5 Hz, 1H), 4.90 (d,  $J$  = 7.5 Hz, 1H); IR (Z+E mixture, KBr,  $\text{cm}^{-1}$ ) 3646, 3315, 3062, 2983, 1785, 1723, 1589, 1491, 1450, 1380, 1250, 1198, 898, 852, 748, 695; HRMS (ESI) Calcd for  $\text{C}_{24}\text{H}_{18}\text{BrN}_2\text{O}_3$  ( $\text{M}+\text{H}$ ) $^+$  461.0495, found 461.0488.

**3-(bromo(phenyl)methylene)-2-phenyltetrahydro-4H-pyrrolo[3,4-d]isoxazole-4,6(5H)-dione (4e)**

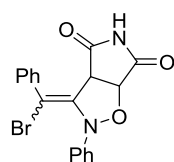

59% yield (45 mg, Z:E = 76:24), yellow liquid (Z+E mixture),  $R_f$  (Z+E mixture) = 0.3 (EtOAc/petroleum ether = 1/2);  $^1\text{H NMR}$  (400 MHz,  $\text{CDCl}_3$ ) for Z-isomer:  $\delta$  8.37 (br, 1H), 8.00 – 7.93 (m, 2H), 7.49 – 6.96 (6H), 6.68 (s, 1H), 4.93 (d,  $J$  = 7.0 Hz, 1H), 4.28 (d,  $J$  = 6.9 Hz, 1H);  $^{13}\text{C NMR}$  (101 MHz,  $\text{CDCl}_3$ ) for Z-isomer:  $\delta$  172.9, 172.1, 145.5, 136.6, 135.8, 135.1, 130.0, 129.4, 129.2, 128.6, 124.5, 116.1, 78.7, 51.8;  $^1\text{H NMR}$  (400 MHz,  $\text{CDCl}_3$ ) for E-isomer:  $\delta$  7.96 (br, 1H), 7.69(m, 2H), 7.49 – 6.96 (6H), 6.68 (s, 1H), 5.02 (d,  $J$  = 7.1 Hz, 1H), 4.83 (d,  $J$  = 7.0 Hz, 1H); IR (Z+E mixture, KBr,  $\text{cm}^{-1}$ ) 3645, 333, 3061, 2985,

1780, 1720, 1580, 1451, 1250, 1198, 896, 851; HRMS (ESI) Calcd for C<sub>18</sub>H<sub>14</sub>BrN<sub>2</sub>O<sub>3</sub> (M+H)<sup>+</sup> 385.0182, found 385.0185.

**3-(bromo(4-chlorophenyl)methylene)-5-methyl-2-phenyltetrahydro-4H-pyrrolo[3,4-d]isoxazole-4,6(5H)-dione (4f)**

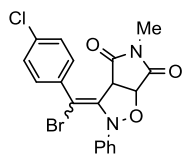

85% yield (73 mg, Z:E = 78:22), yellow solid (Z+E mixture), m. p. (Z+E mixture) 135-139 °C, R<sub>f</sub> (Z+E mixture) = 0.5 (EtOAc/petroleum ether = 1/3); <sup>1</sup>H NMR (400 MHz, CDCl<sub>3</sub>) for Z-isomer: δ 8.01 (d, J = 7.2 Hz, 2H), 7.55 – 6.89 (7H), 4.93 (d, J = 7.0 Hz, 1H), 4.22 (d, J = 7.1 Hz, 1H), 2.43 (s, 3H); <sup>13</sup>C NMR (101 MHz, CDCl<sub>3</sub>) for Z-isomer: δ 172.6, 172.1, 145.7, 136.6, 136.4, 130.0, 129.4, 129.1, 128.5, 124.4, 121.2, 115.7, 77.6, 50.4, 24.9; <sup>1</sup>H NMR (400 MHz, CDCl<sub>3</sub>) for E-isomer: δ 7.67 (d, J = 7.5 Hz, 2H), 7.55 – 6.89 (7H), 5.00 (d, J = 7.0 Hz, 1H), 4.79 (d, J = 7.1 Hz, 1H), 2.43 (s, 3H); IR (Z+E mixture, KBr, cm<sup>-1</sup>) 3743, 3646, 3071, 2984, 1786, 1712, 1589, 1486, 1440, 1384, 1289, 1124, 892, 835, 670; HRMS (ESI) Calcd for C<sub>19</sub>H<sub>15</sub>BrClN<sub>2</sub>O<sub>3</sub> (M+H)<sup>+</sup> 432.9949, found 432.9950.

**3-(bromo(4-fluorophenyl)methylene)-5-methyl-2-phenyltetrahydro-4H-pyrrolo[3,4-d]isoxazole-4,6(5H)-dione (4g)**

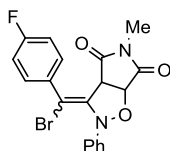

68% yield (56 mg, Z:E = 76:24), Z-isomer (major, 43 mg) and E-isomer (minor, 13 mg) could be obtained simply by column chromatography on silica gel, light yellow solid (Z-isomer), m. p. (Z-isomer) 88-89 °C, R<sub>f</sub> (Z-isomer) = 0.4 (EtOAc/petroleum ether = 1/3), light yellow solid (E-isomer, unstable), R<sub>f</sub> (E-isomer, unstable) = 0.3 (EtOAc/petroleum ether = 1/3); <sup>1</sup>H NMR (400 MHz, CDCl<sub>3</sub>) for Z-isomer: δ 8.10 – 7.95 (m, 2H), 7.31-7.26 (m, 2H), 7.18 – 7.13 (m, 4H), 7.04 (t, J = 7.2 Hz, 1H), 4.95 (d, J = 7.0 Hz, 1H), 4.19 (d, J = 7.0 Hz, 1H), 2.43 (s, 3H); <sup>13</sup>C NMR (101 MHz, CDCl<sub>3</sub>) for Z-isomer: δ 172.5, 172.1, 163.5 (d, J = 251.0 Hz), 145.6, 136.6, 132.7 (d, J = 3.5 Hz), 131.6 (d, J = 8.5 Hz), 129.1, 124.5, 120.0, 115.6 (d, J = 21.8 Hz), 115.6, 77.6, 50.4, 24.9; <sup>19</sup>F NMR (376 MHz, CDCl<sub>3</sub>) for Z-isomer: δ -110.1; <sup>1</sup>H NMR (400 MHz, CDCl<sub>3</sub>) for E-isomer: δ 7.72 – 7.64 (m, 2H), 7.31 – 6.94 (7H), 5.01 (d, J = 7.2 Hz, 1H), 4.78 (d, J = 7.2 Hz, 1H), 2.43 (s, 3H); IR (KBr, cm<sup>-1</sup>) for Z-isomer: 3669, 3073, 2980, 1710, 1597, 1507, 1442, 1381, 1237, 1157, 838, 755, 613; HRMS (ESI) Calcd for C<sub>19</sub>H<sub>13</sub>BrFN<sub>2</sub>O<sub>3</sub> (M-H)<sup>-</sup> 415.0099, found 415.0096.

**3-(bromo(4-bromophenyl)methylene)-5-methyl-2-phenyltetrahydro-4H-pyrrolo[3,4-d]isoxazole-4,6(5H)-dione (4h)**

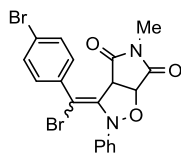

84% yield (79 mg, Z:E = 83:17), Z-isomer (major, 66 mg) and E-isomer (minor, 13 mg) could be obtained simply by column chromatography on silica gel, yellow solid (Z-isomer), m. p. (Z-isomer) 144-145 °C, R<sub>f</sub> (Z-isomer) = 0.4 (EtOAc/petroleum ether = 1/3); yellow solid (E-isomer), m. p. (E-isomer) 126-127 °C, R<sub>f</sub> (E-isomer) = 0.3 (EtOAc/petroleum ether = 1/3); <sup>1</sup>H NMR (500 MHz, CDCl<sub>3</sub>) for Z-isomer: δ 7.91 (d, J = 8.6 Hz, 2H), 7.61 (d, J = 8.6 Hz, 2H), 7.29 (t, J = 8.0 Hz, 2H), 7.16 – 7.08 (m, 2H), 7.04 (t, J = 7.1 Hz, 1H), 4.94 (d, J = 7.0 Hz, 1H), 4.18 (d, J = 7.1 Hz, 1H), 2.43 (s, 3H); <sup>13</sup>C NMR (126 MHz, CDCl<sub>3</sub>) for Z-isomer: δ 172.4, 172.0, 145.5, 136.8, 135.5, 131.8, 131.0, 129.2, 124.6, 124.5, 119.7, 115.6, 77.6, 50.5, 25.0; <sup>1</sup>H NMR (500 MHz, CDCl<sub>3</sub>) for E-isomer: δ 7.61 – 7.52 (m, 2H), 7.45 – 7.36 (m, 2H), 7.17 – 7.14 (m, 2H), 6.99 – 6.88 (m, 3H), 5.01 (d, J = 7.2 Hz, 1H), 4.77 (d, J = 7.2 Hz, 1H), 2.44 (s, 3H); <sup>13</sup>C NMR (126 MHz, CDCl<sub>3</sub>) for E-isomer: δ 172.7, 171.2, 145.8, 136.6, 135.0, 131.5, 130.7, 129.0, 124.6, 123.7, 118.2, 115.8, 76.8, 53.9, 24.9; IR (KBr, cm<sup>-1</sup>) for

Z-isomer: 3707, 3668, 3147, 1796, 1725, 1586, 1429, 1372, 1277, 829, 781, 538, 465; IR (KBr,  $\text{cm}^{-1}$ ) for E-isomer: 3743, 3066, 1703, 1580, 1483, 1281, 1122, 1008, 945, 755; HRMS (ESI) Calcd for  $\text{C}_{19}\text{H}_{13}\text{BrN}_2\text{O}_3$  (M-H)<sup>-</sup> 474.9298, found 474.9293.

**3-(bromo(4-ethylphenyl)methylene)-5-methyl-2-phenyltetrahydro-4H-pyrrolo[3,4-d]isoxazole-4,6(5H)-dione (4i)**

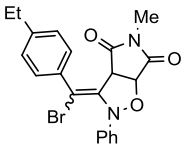  
98% yield (84 mg, Z:E = 33:67), yellow solid (Z+E mixture), m. p. (Z+E mixture) 102-105 °C,  $R_f$  (Z+E mixture) = 0.4 (EtOAc/petroleum ether = 1/3);  $^1\text{H}$  NMR (400 MHz,  $\text{CDCl}_3$ ) for E-isomer:  $\delta$  7.59 (d,  $J$  = 8.1 Hz, 2H), 7.30 – 6.90 (7H), 4.98 (d,  $J$  = 7.2 Hz, 1H), 4.79 (d,  $J$  = 7.2 Hz, 1H), 2.58 (q,  $J$  = 7.5 Hz, 2H), 2.42 (s, 3H), 1.18 (t,  $J$  = 7.6 Hz, 3H);  $^{13}\text{C}$  NMR (101 MHz,  $\text{CDCl}_3$ ) for E-isomer:  $\delta$  172.9, 171.5, 146.4, 145.8, 135.5, 133.5, 129.1, 128.9, 127.7, 124.3, 120.3, 115.9, 76.8, 53.9, 28.5, 24.7, 15.0;  $^1\text{H}$  NMR (400 MHz,  $\text{CDCl}_3$ ) for Z-isomer:  $\delta$  7.92 (d,  $J$  = 7.9 Hz, 2H), 7.30 – 6.90 (7H), 4.91 (d,  $J$  = 7.2 Hz, 1H), 4.22 (d,  $J$  = 7.0 Hz, 1H), 2.71 (q,  $J$  = 7.7 Hz, 2H), 2.42 (s, 3H), 1.28 (t,  $J$  = 7.6 Hz, 3H). IR (Z+E mixture, KBr,  $\text{cm}^{-1}$ ) 3670, 2966, 2901, 1789, 1717, 1594, 1487, 1431, 1378, 1283, 1122, 760; HRMS (ESI) Calcd for  $\text{C}_{21}\text{H}_{19}\text{BrN}_2\text{NaO}_3$  (M+Na)<sup>+</sup> 449.0471, found 449.0472.

**3-(bromo(m-tolyl)methylene)-5-methyl-2-phenyltetrahydro-4H-pyrrolo[3,4-d]isoxazole-4,6(5H)-dione (4j)**

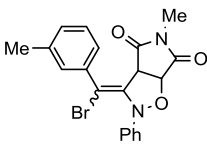  
93% yield (77 mg, Z:E = 85:15), yellow solid (Z+E mixture), m. p. (Z+E mixture) 123-126 °C,  $R_f$  (Z+E mixture) = 0.4 (EtOAc/petroleum ether = 1/3);  $^1\text{H}$  NMR (400 MHz,  $\text{CDCl}_3$ ) for Z-isomer:  $\delta$  7.81 (s, 1H), 7.77 (d,  $J$  = 7.7 Hz, 1H), 7.38 – 6.88 (7H), 4.88 (d,  $J$  = 7.1 Hz, 1H), 4.19 (d,  $J$  = 7.0 Hz, 1H), 2.43 (s, 3H), 2.40 (s, 3H);  $^{13}\text{C}$  NMR (101 MHz,  $\text{CDCl}_3$ ) for Z-isomer:  $\delta$  172.6, 172.0, 145.9, 138.3, 136.6, 136.2, 130.7, 130.0, 129.1, 128.4, 126.5, 124.3, 121.3, 115.7, 77.6, 50.5, 24.8, 21.3;  $^1\text{H}$  NMR (400 MHz,  $\text{CDCl}_3$ ) for E-isomer:  $\delta$  7.44 (d,  $J$  = 8.2 Hz, 2H), 7.38 – 6.88 (7H), 4.95 (d,  $J$  = 7.2 Hz, 1H), 4.75 (d,  $J$  = 7.2 Hz, 1H), 2.40 (s, 3H), 2.26 (s, 3H); IR (Z+E mixture, KBr,  $\text{cm}^{-1}$ ) 3709, 3061, 2986, 1788, 1714, 1593, 1486, 1432, 1377, 1283, 761, 650, 586; HRMS (ESI) Calcd for  $\text{C}_{20}\text{H}_{17}\text{BrN}_2\text{NaO}_3$  (M+Na)<sup>+</sup> 435.0315, found 435.0311.

**3-(bromo(o-tolyl)methylene)-5-methyl-2-phenyltetrahydro-4H-pyrrolo[3,4-d]isoxazole-4,6(5H)-dione (4k)**

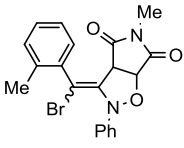  
77% yield (64 mg, Z:E = 48:52), yellow solid (Z+E mixture), m. p. (Z+E mixture) 159-162 °C,  $R_f$  (Z+E mixture) = 0.4 (EtOAc/petroleum ether = 1/3);  $^1\text{H}$  NMR (Z+E mixture, 400 MHz,  $\text{CDCl}_3$ )  $\delta$  7.75 (s, 1H), 7.36 (s, 4H), 7.32 – 7.27 (m, 6H), 7.21 (d,  $J$  = 7.6 Hz, 4H), 7.11 – 7.00 (m, 3H), 4.97 (d,  $J$  = 6.7 Hz, 1H), 4.93 (d,  $J$  = 7.0 Hz, 1H), 4.20 (d,  $J$  = 7.0 Hz, 1H), 3.88 (d,  $J$  = 6.8 Hz, 1H), 2.61 (s, 3H), 2.42 (s, 3H), 2.37 (s, 6H);  $^{13}\text{C}$  NMR (Z+E mixture, 101 MHz,  $\text{CDCl}_3$ )  $\delta$  172.8, 172.7, 171.3, 170.8, 145.7, 145.6, 139.3, 137.6, 136.7, 135.4, 135.4, 132.4, 131.1, 130.5, 130.1, 130.0, 129.1, 129.1, 127.6, 126.4, 125.9, 124.7, 124.6, 118.6, 117.4, 116.4, 116.1, 77.8, 77.6, 51.0, 50.7, 24.81, 24.75, 20.3, 19.6; IR (Z+E mixture, KBr,  $\text{cm}^{-1}$ ) 3669, 3145, 1822, 1716, 1592, 1518, 1484, 1427, 1375, 750, 718; HRMS (ESI) Calcd for  $\text{C}_{20}\text{H}_{18}\text{BrN}_2\text{O}_3$  (M+H)<sup>+</sup> 413.0495, found 413.0488.

**3-(bromo(4-ethoxyphenyl)methylene)-5-methyl-2-phenyltetrahydro-4H-pyrrolo[3,4-d]isoxazole-4,6(5H)-dione (4l)**

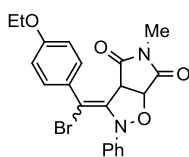

58% yield (NMR detected, Z:E = 78:22), single Z-isomer (45 mg) could be obtained after column chromatography on silica gel, yellow solid (Z-isomer), m. p. (Z-isomer) 100-101 °C,  $R_f$  (Z-isomer) = 0.3 (EtOAc/petroleum ether = 1/2);  $^1\text{H}$  NMR (400 MHz,  $\text{CDCl}_3$ ) for Z-isomer:  $\delta$  7.97 (d,  $J$  = 8.3 Hz, 2H), 7.30 – 7.27 (m, 2H), 7.14 (d,  $J$  = 8.0 Hz, 2H), 7.02 (t,  $J$  = 7.3 Hz, 1H), 6.96 (d,  $J$  = 8.4 Hz, 2H), 4.92 (d,  $J$  = 7.1 Hz, 1H), 4.22 (d,  $J$  = 7.0 Hz, 1H), 4.09 (q,  $J$  = 6.9 Hz, 2H), 2.41 (s, 3H), 1.45 (t,  $J$  = 6.9 Hz, 3H);  $^{13}\text{C}$  NMR (101 MHz,  $\text{CDCl}_3$ ) for Z-isomer:  $\delta$  172.7, 172.3, 160.3, 145.9, 135.3, 131.0, 129.1, 128.7, 124.3, 121.9, 115.5, 114.3, 77.7, 63.7, 50.3, 24.9, 14.8; IR (KBr,  $\text{cm}^{-1}$ ) for Z-isomer: 3610, 2981, 2961, 1713, 1598, 1510, 1438, 1384, 1257, 1174, 825, 760, 695; HRMS (ESI) Calcd for  $\text{C}_{21}\text{H}_{18}\text{BrN}_2\text{O}_4$  (M-H) $^-$  441.0455, found 441.0448.

**3-(benzo[d][1,3]dioxol-5-ylbromomethylene)-5-methyl-2-phenyltetrahydro-4H-pyrrolo[3,4-d]-isoxazole-4,6(5H)-dione (4m)**

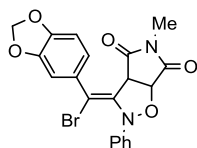

50% yield (NMR detected, Z:E = 80:20), single Z-isomer (40 mg) could be obtained after column chromatography on silica gel, yellow solid (Z-isomer), m. p. (Z-isomer) 110-111 °C,  $R_f$  (Z-isomer) = 0.3 (EtOAc/petroleum ether = 1/2);  $^1\text{H}$  NMR (400 MHz,  $\text{CDCl}_3$ ) for Z-isomer:  $\delta$  7.63 (d,  $J$  = 8.1 Hz, 1H), 7.46 (s, 1H), 7.30 (d,  $J$  = 7.6 Hz, 2H), 7.13 (d,  $J$  = 7.9 Hz, 2H), 7.03 (t,  $J$  = 7.3 Hz, 1H), 6.89 (d,  $J$  = 8.1 Hz, 1H), 6.04 (s, 2H), 4.94 (d,  $J$  = 7.1 Hz, 1H), 4.25 (d,  $J$  = 7.0 Hz, 1H), 2.42 (s, 3H);  $^{13}\text{C}$  NMR (101 MHz,  $\text{CDCl}_3$ ) for Z-isomer:  $\delta$  172.6, 172.2, 149.1, 147.7, 145.8, 135.8, 130.3, 129.1, 124.4, 124.0, 121.3, 115.6, 109.9, 108.1, 101.7, 77.6, 50.4, 24.9; IR (KBr,  $\text{cm}^{-1}$ ) for Z-isomer: 3673, 3129, 1824, 1710, 1504, 1481, 1349, 1259, 1035, 804, 750, 540; HRMS (ESI) Calcd for  $\text{C}_{20}\text{H}_{16}\text{BrN}_2\text{O}_5$  (M+H) $^+$  443.0237, found 443.0230.

**3-(bromo(naphthalen-1-yl)methylene)-5-methyl-2-phenyltetrahydro-4H-pyrrolo[3,4-d]isoxazole-4,6(5H)-dione (4n)**

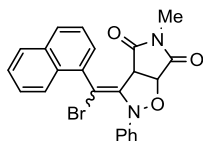

52% yield (47 mg, Z:E = 82:18), yellow solid (Z+E mixture), m. p. (Z+E mixture) 120-125 °C,  $R_f$  (Z+E mixture) = 0.4 (EtOAc/petroleum ether = 1/3);  $^1\text{H}$  NMR (500 MHz,  $\text{CDCl}_3$ ) for Z-isomer:  $\delta$  8.09 (d,  $J$  = 8.3 Hz, 1H), 8.03 (dd,  $J$  = 7.1, 1.2 Hz, 1H), 7.98 – 7.04 (10H), 4.86 (d,  $J$  = 7.1 Hz, 1H), 3.78 (d,  $J$  = 7.1 Hz, 1H), 2.36 (s, 3H);  $^{13}\text{C}$  NMR (126 MHz,  $\text{CDCl}_3$ ) for Z-isomer:  $\delta$  172.7, 171.3, 145.7, 138.8, 133.7, 132.7, 130.8, 130.5, 129.2, 128.8, 127.3, 126.6, 125.3, 124.7, 124.6, 117.0, 116.9, 116.2, 77.6, 50.7, 24.8;  $^1\text{H}$  NMR (500 MHz,  $\text{CDCl}_3$ ) for E-isomer:  $\delta$  8.12 (d,  $J$  = 8.5 Hz, 1H), 7.98 – 7.04 (11H), 4.97 (d,  $J$  = 7.2 Hz, 1H), 4.28 (d,  $J$  = 7.2 Hz, 1H), 2.32 (s, 3H); IR (Z+E mixture, KBr,  $\text{cm}^{-1}$ ) 3620, 3489, 3309, 3059, 2987, 1788, 1716, 1591, 1491, 1435, 1379, 1284, 789, 765; HRMS (ESI) Calcd for  $\text{C}_{23}\text{H}_{18}\text{BrN}_2\text{O}_3$  (M+H) $^+$  449.0495, found 449.0495.

**3-(bromo(thiophen-3-yl)methylene)-5-methyl-2-phenyltetrahydro-4H-pyrrolo[3,4-d]isoxazole-4,6(5H)-dione (4o)**

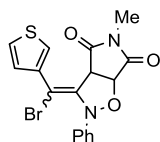

93% yield (75 mg, Z:E = 78:22), yellow solid (Z+E mixture), m. p. (Z+E mixture) 160-163 °C  $R_f$  (Z+E mixture) = 0.4 (EtOAc/petroleum ether = 1/3);  $^1\text{H}$  NMR (400

MHz, CDCl<sub>3</sub>) for Z-isomer:  $\delta$  8.60 (d,  $J$  = 2.8 Hz, 1H), 7.60 (d,  $J$  = 5.1 Hz, 1H), 7.41 – 6.97 (6H), 4.95 (d,  $J$  = 7.1 Hz, 1H), 4.39 (d,  $J$  = 7.1 Hz, 1H), 2.44 (s, 3H); <sup>13</sup>C NMR (101 MHz, CDCl<sub>3</sub>) for Z-isomer:  $\delta$  172.6, 145.9, 136.9, 135.3, 129.1, 128.8, 126.9, 126.1, 124.4, 116.0, 115.5, 77.8, 50.5, 24.9; <sup>1</sup>H NMR (400 MHz, CDCl<sub>3</sub>) for E-isomer:  $\delta$  7.65 (d,  $J$  = 2.8 Hz, 1H), 7.50 (d,  $J$  = 5.2 Hz, 1H), 7.41 – 6.97 (6H), 4.95 (d,  $J$  = 7.1 Hz, 1H), 4.82 (d,  $J$  = 7.2 Hz, 1H), 2.42 (s, 3H); IR (Z+E mixture, KBr, cm<sup>-1</sup>) 3670, 3483, 3225, 2987, 1789, 1730, 1592, 1487, 1432, 1281, 1084, 842, 627; HRMS (ESI) Calcd for C<sub>17</sub>H<sub>13</sub>BrN<sub>2</sub>NaO<sub>3</sub>S (M+Na)<sup>+</sup> 426.9722, found 426.9730.

**3-(bromo(1-tosyl-1H-indol-3-yl)methylene)-5-methyl-2-phenyltetrahydro-4H-pyrrolo[3,4-d]-isoxazole-4,6(5H)-dione (4p)**

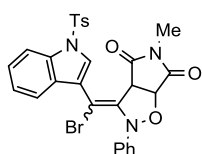

60% yield (NMR detected, Z:E = 78:22), single Z-isomer (66 mg) could be obtained after column chromatography on silica gel, yellow solid (Z-isomer), m. p. (Z-isomer) 158-159 °C, R<sub>f</sub> (Z-isomer) = 0.4 (DCM/petroleum ether/EtOAc = 10/10/1); <sup>1</sup>H NMR (400 MHz, CDCl<sub>3</sub>) for Z-isomer:  $\delta$  8.94 (s, 1H), 8.04 (d,  $J$  = 8.4 Hz, 1H), 7.96 – 7.88 (m, 3H), 7.40 (t,  $J$  = 7.8 Hz, 1H), 7.36 – 7.26 (m, 5H), 7.19 – 7.12 (m, 2H), 7.06 (t,  $J$  = 7.4 Hz, 1H), 4.95 (d,  $J$  = 7.1 Hz, 1H), 4.18 (d,  $J$  = 7.0 Hz, 1H), 2.48 (s, 3H), 2.36 (s, 3H); <sup>13</sup>C NMR (101 MHz, CDCl<sub>3</sub>) for Z-isomer:  $\delta$  172.7, 172.3, 145.7, 145.6, 137.3, 134.9, 134.9, 130.1, 129.2, 128.5, 127.8, 127.3, 125.5, 124.6, 123.6, 121.6, 117.1, 115.8, 113.6, 111.7, 77.8, 51.0, 25.1, 21.7; IR (KBr, cm<sup>-1</sup>) for Z-isomer: 3671, 3124, 3062, 2977, 1919, 1790, 1594, 1542, 1448, 1371, 1174, 917, 749, 572, 491; HRMS (ESI) Calcd for C<sub>28</sub>H<sub>23</sub>BrN<sub>3</sub>O<sub>5</sub>S (M+H)<sup>+</sup> 592.0536, found 592.0540.

**3-(bromo(furan-3-yl)methylene)-5-methyl-2-phenyltetrahydro-4H-pyrrolo[3,4-d]isoxazole-4,6(5H)-dione (4q)**

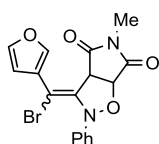

56% yield (44 mg, Z:E = 77:23), yellow solid (Z+E mixture), m. p. (Z+E mixture) 108-109 °C, R<sub>f</sub> (Z+E mixture) = 0.4 (EtOAc/petroleum ether = 1/3); <sup>1</sup>H NMR (400 MHz, CDCl<sub>3</sub>) for Z-isomer:  $\delta$  8.62 (s, 1H), 7.52 (s, 1H), 7.36 – 6.97 (5H), 6.92 (s, 1H), 5.01 (d,  $J$  = 7.1 Hz, 1H), 4.42 (d,  $J$  = 7.1 Hz, 1H), 2.44 (s, 3H); <sup>13</sup>C NMR (101 MHz, CDCl<sub>3</sub>) for Z-isomer:  $\delta$  172.7, 172.4, 145.8, 143.6, 142.9, 134.7, 129.1, 124.5, 123.0, 115.6, 112.1, 111.4, 78.1, 50.3, 24.9; <sup>1</sup>H NMR (400 MHz, CDCl<sub>3</sub>) for E-isomer:  $\delta$  7.65 (s, 1H), 7.36 – 6.97 (6H), 6.70 (s, 1H), 4.96 (d,  $J$  = 7.2 Hz, 1H), 4.78 (d,  $J$  = 7.2 Hz, 1H), 2.43 (s, 3H); IR (Z+E mixture, KBr, cm<sup>-1</sup>) 3669, 3146, 2926, 1713, 1594, 1495, 1437, 1383, 1277, 1081, 1024, 749, 698, 600; HRMS (ESI) Calcd for C<sub>17</sub>H<sub>14</sub>BrN<sub>2</sub>O<sub>4</sub> (M+H)<sup>+</sup> 389.0131, found 389.0133.

**3-(iodo(phenyl)methylene)-5-methyl-2-phenyltetrahydro-4H-pyrrolo[3,4-d]isoxazole-4,6(5H)-dione (4s)**

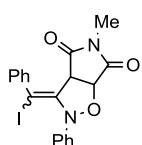

69% yield (61 mg, Z:E = 94:6), white solid (Z+E mixture), m. p. (Z+E mixture) 140-141 °C, R<sub>f</sub> (Z+E mixture) = 0.4 (EtOAc/petroleum ether = 1/3); <sup>1</sup>H NMR (400 MHz, CDCl<sub>3</sub>) for Z-isomer:  $\delta$  7.89 (d,  $J$  = 7.5 Hz, 2H), 7.46 – 7.36 (m, 3H), 7.29 (t,  $J$  = 7.5 Hz, 2H), 7.17 (d,  $J$  = 7.9 Hz, 2H), 7.03 (t,  $J$  = 7.4 Hz, 1H), 4.95 (d,  $J$  = 7.0 Hz, 1H), 4.18 (d,  $J$  = 7.1 Hz, 1H), 2.38 (s, 3H); <sup>13</sup>C NMR (101 MHz, CDCl<sub>3</sub>) for Z-isomer:  $\delta$  172.7, 171.8, 145.4, 140.7, 139.7, 129.6, 129.4, 129.1, 128.5, 124.5, 116.0, 98.9, 78.1, 49.4, 24.8; IR (Z+E mixture, KBr, cm<sup>-1</sup>) 3674, 3060, 1789, 1715, 1592, 1487, 1432, 1378, 1284, 1199, 844, 696, 562; HRMS (ESI) Calcd for C<sub>19</sub>H<sub>14</sub>IN<sub>2</sub>O<sub>3</sub> (M-H)<sup>-</sup> 445.0055, found 445.0052



**3-(iodo(*m*-tolyl)methylene)-5-methyl-2-phenyltetrahydro-4H-pyrrolo[3,4-*d*]isoxazole-4,6(5H)-dione (4t)**

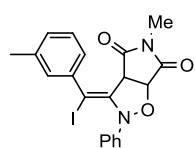

40% yield (NMR detected, Z:E = 92:8), single Z-isomer (34 mg) could be obtained after column chromatography on silica gel, white solid (Z-isomer), m. p. (Z-isomer) 115-116 °C,  $R_f$  (Z-isomer) = 0.4 (EtOAc/petroleum ether = 1/3);  $^1\text{H}$  NMR (400 MHz,  $\text{CDCl}_3$ ) for Z-isomer:  $\delta$  7.73 (s, 1H), 7.68 (d,  $J = 7.7$  Hz, 1H), 7.34 – 7.27 (m, 3H), 7.21 – 7.15 (m, 3H), 7.03 (t,  $J = 7.3$  Hz, 1H), 4.93 (d,  $J = 7.1$  Hz, 1H), 4.18 (d,  $J = 7.1$  Hz, 1H), 2.43 (s, 3H), 2.38 (s, 3H);  $^{13}\text{C}$  NMR (101 MHz,  $\text{CDCl}_3$ ) for Z-isomer:  $\delta$  172.7, 171.9, 145.5, 140.5, 139.6, 138.3, 130.4, 130.0, 129.1, 128.3, 126.5, 124.5, 116.0, 99.3, 78.1, 49.4, 24.8, 21.4; IR (KBr,  $\text{cm}^{-1}$ ) for Z-isomer: 3743, 3663, 3058, 2971, 1786, 1713, 1590, 1485, 1436, 1377, 1124, 753, 697; HRMS (ESI) Calcd for  $\text{C}_{20}\text{H}_{18}\text{IN}_2\text{O}_3$  ( $\text{M}+\text{H}$ ) $^+$  461.0357, found 461.0359.

**3-(iodo(phenyl)methylene)-2,5-diphenyltetrahydro-4H-pyrrolo[3,4-*d*]isoxazole-4,6(5H)-dione (4u)**

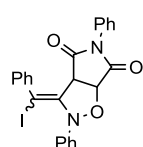

50% yield (51 mg, Z:E = 92:8), light yellow solid (Z+E mixture), m. p. (Z+E mixture) 130-131 °C;  $R_f$  (Z+E mixture) = 0.3 (EtOAc/petroleum ether = 1/3)  $^1\text{H}$  NMR (400 MHz,  $\text{CDCl}_3$ ) for Z-isomer:  $\delta$  7.90 (d,  $J = 7.5$  Hz, 2H), 7.45 – 7.39 (m, 3H), 7.35 (t,  $J = 7.4$  Hz, 2H), 7.29 – 7.26 (m, 5H), 7.14 (t,  $J = 7.3$  Hz, 1H), 6.34 (d,  $J = 7.3$  Hz, 2H), 5.12 (d,  $J = 7.1$  Hz, 1H), 4.36 (d,  $J = 7.2$  Hz, 1H);  $^{13}\text{C}$  NMR (101 MHz,  $\text{CDCl}_3$ ) for Z-isomer:  $\delta$  171.8, 171.0, 145.6, 140.6, 139.7, 130.7, 129.7, 129.6, 129.5, 129.2, 129.0, 128.5, 126.1, 124.6, 116.1, 99.4, 78.2, 49.5; IR (Z+E mixture, KBr,  $\text{cm}^{-1}$ ) 3062, 2923, 2849, 1691, 1595, 1470, 1451, 1329, 1278, 1235, 1022, 912, 757, 696; HRMS (ESI) Calcd for  $\text{C}_{24}\text{H}_{17}\text{IN}_2\text{NaO}_3$  ( $\text{M}+\text{Na}$ ) $^+$  531.0176, found 531.0186.

**3-(bromo(phenyl)methylene)-2-(4-bromophenyl)-5-methyltetrahydro-4H-pyrrolo[3,4-*d*]isoxazole-4,6(5H)-dione (4w)**

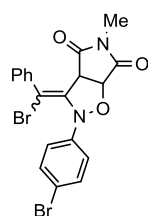

63% yield (60 mg, Z:E = 69:31), yellow solid (Z+E mixture), m. p. (Z+E mixture) 135-139 °C,  $R_f$  (Z+E mixture) = 0.3 (EtOAc/petroleum ether = 1/3);  $^1\text{H}$  NMR (400 MHz,  $\text{CDCl}_3$ ) for Z-isomer:  $\delta$  7.99 (dd,  $J = 7.3, 2.1$  Hz, 2H), 7.53 – 7.18 (5H), 7.07 – 6.97 (m, 2H), 4.93 (d,  $J = 7.1$  Hz, 1H), 4.23 (d,  $J = 7.1$  Hz, 1H), 2.51 (s, 3H);  $^{13}\text{C}$  NMR (101 MHz,  $\text{CDCl}_3$ ) for Z-isomer:  $\delta$  172.4, 171.9, 144.9, 136.3, 135.9, 132.1, 130.2, 129.4, 128.6, 121.6, 117.4, 117.2, 77.7, 50.4, 25.1;  $^1\text{H}$  NMR (400 MHz,  $\text{CDCl}_3$ ) for E-isomer:  $\delta$  7.64 (d,  $J = 6.8$  Hz, 2H), 7.53 – 7.18 (5H), 6.92 – 6.78 (m, 2H), 5.02 (d,  $J = 7.3$  Hz, 1H), 4.78 (d,  $J = 7.3$  Hz, 1H), 2.51 (s, 3H); IR (Z+E mixture, KBr,  $\text{cm}^{-1}$ ) 3745, 3620, 3488, 3063, 2980, 1787, 1714, 1480, 1435, 1379, 1286, 1123, 823, 701; HRMS (ESI) Calcd for  $\text{C}_{19}\text{H}_{15}\text{Br}_2\text{N}_2\text{O}_3$  ( $\text{M}+\text{H}$ ) $^+$  476.9444, found 476.9438.

**4-(3-(bromo(phenyl)methylene)-5-methyl-4,6-dioxohexahydro-2H-pyrrolo[3,4-*d*]isoxazol-2-yl)benzotrile (4x)**

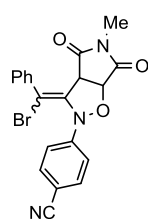

63% yield (53 mg, Z:E = 67:33), light yellow solid (Z+E mixture), m. p. (Z+E mixture) 120-124 °C,  $R_f$  (Z+E mixture) = 0.3 (EtOAc/petroleum ether = 1/3.5);  $^1\text{H}$  NMR (400 MHz,  $\text{CDCl}_3$ ) for Z-isomer:  $\delta$  8.06 – 7.91 (m, 2H), 7.70 – 6.89 (7H), 4.97 (d,  $J = 7.0$  Hz, 1H), 4.25 (d,  $J = 7.1$  Hz, 1H), 2.51 (s, 3H);  $^{13}\text{C}$  NMR (101 MHz,  $\text{CDCl}_3$ ) for Z-isomer:  $\delta$  171.9, 171.6, 149.2, 135.9, 134.8, 133.3, 130.5, 129.3, 128.7, 123.0, 115.5, 107.2, 53.2, 50.1, 25.2;  $^1\text{H}$  NMR (400 MHz,  $\text{CDCl}_3$ ) for E-isomer:  $\delta$  7.65 (d,  $J = 7.6$

Hz, 2H), 7.60 – 6.60 (7H), 5.09 ( $J = 7.2$  Hz, 1H), 4.78 (d,  $J = 7.2$  Hz, 1H), 2.51 (s, 3H); IR (Z+E mixture, KBr,  $\text{cm}^{-1}$ ) 3483, 3370, 3062, 2986, 2236, 1789, 1715, 1601, 1495, 1432, 1379, 1286, 841, 734; HRMS (ESI) Calcd for  $\text{C}_{20}\text{H}_{15}\text{BrN}_3\text{O}_3$  ( $\text{M}+\text{H}$ ) $^+$  424.0291, found 424.0293.

**3-(bromo(phenyl)methylene)-5-methyl-2-(p-tolyl)tetrahydro-4H-pyrrolo[3,4-d]isoxazole-4,6(5H)-dione (4y)**

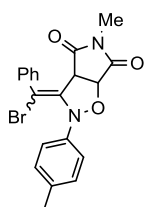

84% yield (NMR detected, Z:E = 74:26), single Z-isomer (67 mg) could be obtained after column chromatography on silica gel, yellow solid (Z-isomer), m. p. (Z-isomer) 150-151 °C,  $R_f$  (Z-isomer) = 0.4 (EtOAc/petroleum ether = 1/3);  $^1\text{H}$  NMR (500 MHz,  $\text{CDCl}_3$ ) for Z-isomer:  $\delta$  7.98 (d,  $J = 6.8$  Hz, 2H), 7.54 – 7.37 (m, 3H), 7.09 (d,  $J = 8.3$  Hz, 2H), 7.04 (d,  $J = 8.3$  Hz, 2H), 4.92 (d,  $J = 7.1$  Hz, 1H), 4.23 (d,  $J = 7.1$  Hz, 1H), 2.45 (s, 3H), 2.27 (s, 3H);  $^{13}\text{C}$  NMR (126 MHz,  $\text{CDCl}_3$ ) for Z-isomer:  $\delta$  171.6, 171.0, 142.3, 135.7, 135.5, 133.1, 128.9, 128.6, 128.4, 127.5, 119.4, 115.0, 76.6, 49.6, 23.9, 19.6; IR (KBr,  $\text{cm}^{-1}$ ) for Z-isomer: 3743, 3644, 3293, 2979, 1783, 1711, 1503, 1435, 1379, 1279, 1119, 744, 692; HRMS (ESI) Calcd for  $\text{C}_{20}\text{H}_{18}\text{BrN}_2\text{O}_3$  ( $\text{M}+\text{H}$ ) $^+$  413.0495, found 413.0490.

**(Z)-3-hydroxy-1-methyl-4-(2-phenyl-1-(phenylamino)ethylidene)pyrrolidine-2,5-dione (5a)**

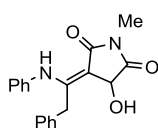

75% yield (48 mg), yellow solid, m. p. 65-66 °C,  $R_f$  = 0.3 (EtOAc/petroleum ether = 1/1);  $^1\text{H}$  NMR (400 MHz,  $\text{CDCl}_3$ )  $\delta$  10.47 (s, 1H), 7.29 (d,  $J = 7.0$  Hz, 1H), 7.21 (m, 5H), 7.06 (d,  $J = 7.0$  Hz, 2H), 7.01 (d,  $J = 7.7$  Hz, 2H), 4.68 (s, 1H), 4.02 (d,  $J = 15.6$  Hz, 1H), 3.88 (d,  $J = 15.5$  Hz, 1H), 3.21 (br, 1H), 3.02 (s, 3H);  $^{13}\text{C}$  NMR (101 MHz,  $\text{CDCl}_3$ )  $\delta$  176.8, 171.5, 159.4, 137.7, 135.9, 129.2, 128.7, 128.2, 126.8, 126.5, 125.9, 94.4, 68.0, 34.1, 23.9; IR (KBr,  $\text{cm}^{-1}$ ) 3744, 3646, 3271, 3059, 2940, 1745, 1701, 1588, 1493, 1442, 1269, 1184, 1102, 1022, 746; HRMS (ESI) Calcd for  $\text{C}_{19}\text{H}_{18}\text{N}_2\text{NaO}_3$  ( $\text{M}+\text{Na}$ ) $^+$  345.1210, found 345.1208.

**3-(2-(4-bromophenyl)-1-(phenylamino)ethylidene)-4-hydroxy-1-methylpyrrolidine-2,5-dione (5h)**

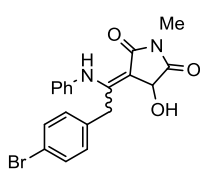

50% yield (40 mg, Z:E = 89:11), light yellow solid (Z+E mixture), m. p. (Z+E mixture) 124-125 °C,  $R_f$  (Z+E mixture) = 0.3 (EtOAc/petroleum ether = 1/1);  $^1\text{H}$  NMR (500 MHz,  $\text{CDCl}_3$ ) for Z-isomer:  $\delta$  10.40 (s, 1H), 7.35 – 7.26 (m, 4H), 7.22 (d,  $J = 7.3$  Hz, 1H), 6.98 (d,  $J = 6.0$  Hz, 2H), 6.91 (d,  $J = 6.4$  Hz, 2H), 4.73 (s, 1H), 3.95 (d,  $J = 15.5$  Hz, 1H), 3.81 (d,  $J = 15.6$  Hz, 1H), 3.60 (br, 1H), 3.02 (s, 3H);  $^{13}\text{C}$  NMR (126 MHz,  $\text{CDCl}_3$ ) for Z-isomer:  $\delta$  176.9, 171.4, 158.7, 137.6, 134.9, 131.6, 130.0, 129.3, 126.7, 126.0, 120.7, 94.5, 68.0, 33.7, 23.9; IR (Z+E mixture, KBr,  $\text{cm}^{-1}$ ) 3745, 3620, 3276, 3055, 2926, 1702, 1668, 1592, 1489, 1442, 1382, 1266, 1020, 798, 745; HRMS (ESI) Calcd for  $\text{C}_{19}\text{H}_{17}\text{BrN}_2\text{NaO}_3$  ( $\text{M}+\text{Na}$ ) $^+$  423.0315, found 423.0319.

**3-(2-bromo-2-phenyl-1-(phenylamino)vinyl)-4-hydroxy-1-methylpyrrolidine-2,5-dione (6)**

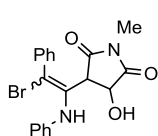

50% yield (40 mg, Z:E = 71:29), yellow solid (Z+E mixture), m. p. (Z+E mixture) 156-160 °C,  $R_f$  (Z+E mixture) = 0.3 (EtOAc/petroleum ether = 1/1);  $^1\text{H}$  NMR (500 MHz,  $\text{CDCl}_3$ ) for Z-isomer:  $\delta$  7.85 (dd,  $J = 6.7, 2.9$  Hz, 2H), 7.38 – 6.95 (8H), 4.85 (s, 1H), 4.44 (d,  $J = 6.2$  Hz, 1H), 3.89 (d,  $J = 6.1$  Hz, 1H), 3.42 (br, 1H), 2.31 (s, 3H);  $^{13}\text{C}$  NMR (126 MHz,  $\text{CDCl}_3$ ) for Z-isomer:  $\delta$  169.5, 146.1, 137.6, 137.5, 129.6, 129.5, 128.9, 128.3, 124.4, 118.2, 117.5, 87.3, 83.2, 51.3, 27.4;  $^1\text{H}$  NMR (500 MHz,  $\text{CDCl}_3$ ) for E-isomer:  $\delta$  8.07 – 7.95 (m, 2H), 7.42 – 6.91 (8H), 4.85 (m, 1H), 4.75 (dd,  $J = 6.6, 4.7$  Hz, 1H), 4.03 (d,  $J = 6.7$  Hz, 1H), 3.42 (s, 1H),

2.45 (s, 3H); IR (Z+E mixture, KBr,  $\text{cm}^{-1}$ ) 3071, 2955, 1750, 1711, 1598, 1500, 1425, 1277, 1234, 802, 688; HRMS (ESI) Calcd for  $\text{C}_{19}\text{H}_{18}\text{BrN}_2\text{O}_3$  ( $\text{M}+\text{H}$ )<sup>+</sup> 401.0495, found 401.0497.

### 3.3 Gram-Scale Reaction of 4a

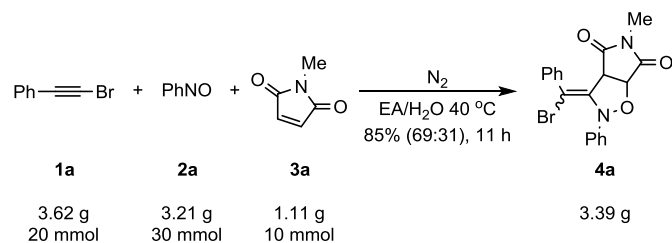

### 3.4 Isomerization reaction of 4a to Z-4a

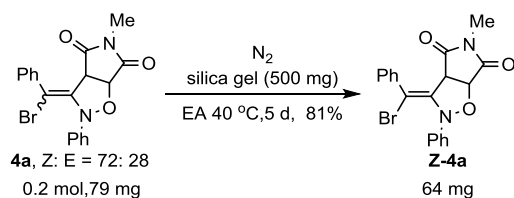

### 3.5 Control Reactions

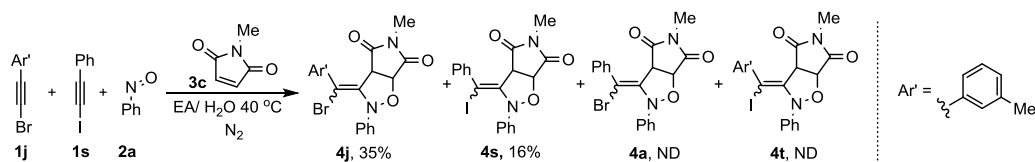

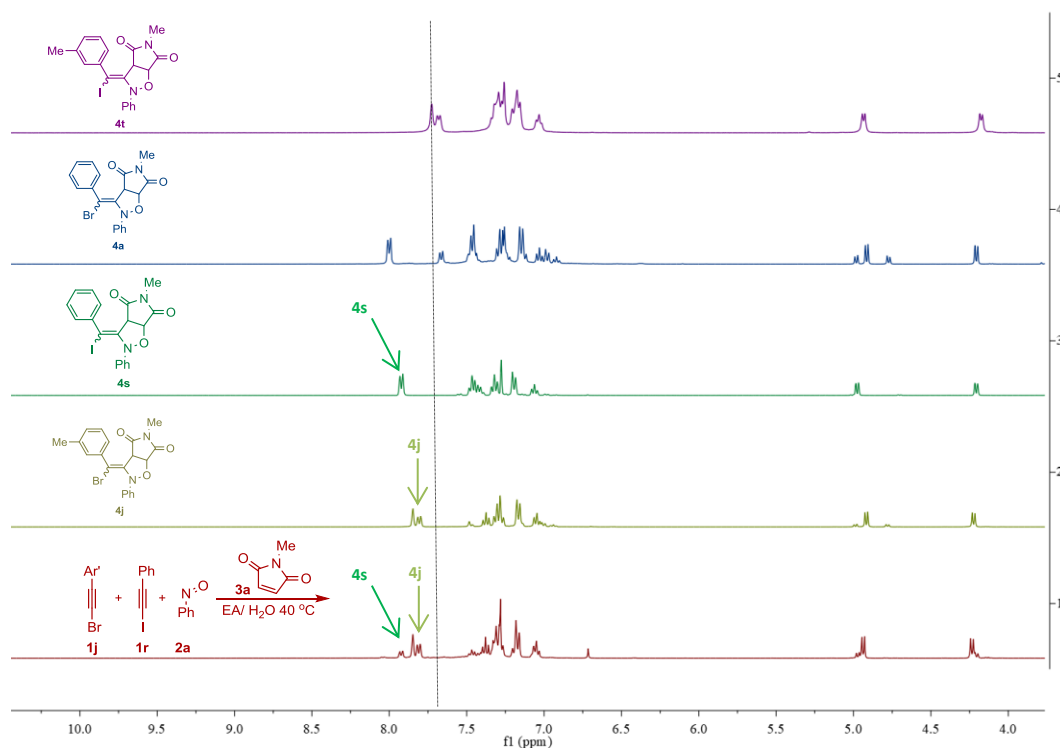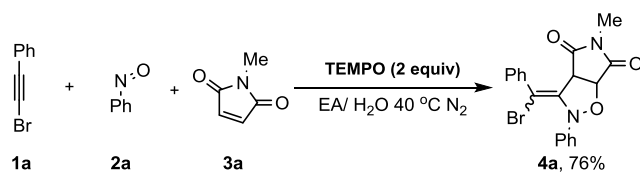

In a Schlenk tube with a magnetic bar under nitrogen atmosphere, EA (1 ml), H<sub>2</sub>O (0.3 ml), the substrates of bromoalkyne **1a** (72 mg, 0.4 mmol), nitrosobenzene **2a** (64 mg, 0.6 mmol), maleimide **3a** (22 mg, 0.2 mmol) and TEMPO (62 mg, 0.4 mmol) were added. The mixture was stirred at 40 °C for 11 h. After remove of the water by Na<sub>2</sub>SO<sub>4</sub>, extracted by EA for three times, the organic solvent was evaporated by rotary evaporator to afford the crude product **4a** (76%, NMR yield).

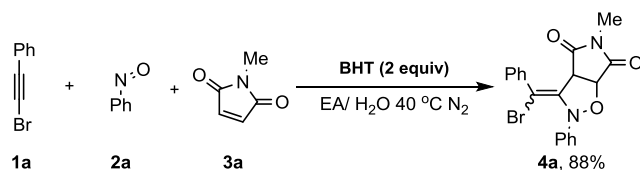

In a Schlenk tube with a magnetic bar under nitrogen atmosphere, EA (1 ml), H<sub>2</sub>O (0.3 ml), the substrates of bromoalkyne **1a** (72 mg, 0.4 mmol), nitrosobenzene **2a** (64 mg, 0.6 mmol), maleimide **3a** (22 mg, 0.2 mmol) and BHT (88 mg, 0.4 mmol) were added. The mixture was stirred at 40 °C for 11 h. After remove of the water by Na<sub>2</sub>SO<sub>4</sub>, extracted by EA for three times, the organic solvent was evaporated by rotary evaporator to afford the crude product **4a** (88%, NMR yield).

### 3.6 Experimental procedures for the synthesis of compounds 5 and 6

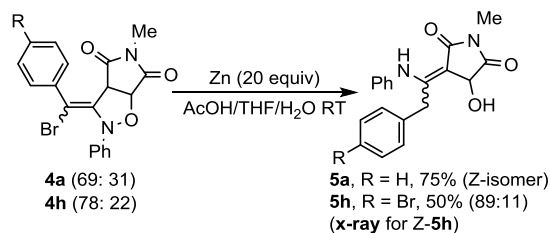

In a Schlenk tube with a magnetic bar under nitrogen atmosphere, AcOH (0.5 ml), THF (1.5 ml), H<sub>2</sub>O (1.0 ml), **4a** (80 mg, 0.2 mmol) and Zn powder (260 mg, 4 mmol) were added. The mixture was stirred at room temperature until **4a** was completely consumed. After neutralization by adding saturated NaHCO<sub>3</sub> aqueous solution, extracted by EA for 3 times, the organic solvent was evaporated by rotary evaporator, and the residue was purified by flash column chromatography on silica gel using EtOAc/petroleum ether as eluent to afford the product **5a** (48 mg, 0.15 mmol).

The procedures of substrate **4h**, were similar with that mentioned above.

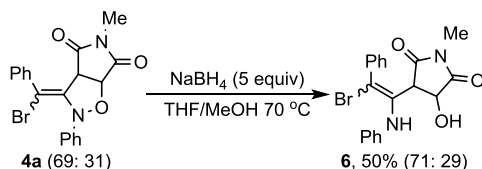

In a Schlenk tube with a magnetic bar under nitrogen atmosphere, THF (4.0 ml), **4a** (80 mg, 0.2 mmol) and NaBH<sub>4</sub> (38 mg, 1.0 mmol) were added. The mixture was stirred at 70 °C for 15 min, followed by adding MeOH (0.4 mL) and kept stirred until the starting material was consumed. After rapid filtration of silica gel, the solvent was evaporated by rotary evaporator, and the residue was purified by flash column chromatography on silica gel using EtOAc/petroleum ether as eluent to afford the product **6** (40 mg, 0.1 mmol).

## 4. X-Ray diffraction analysis

### 4.1 Crystal data and structure refinement for Z-4s

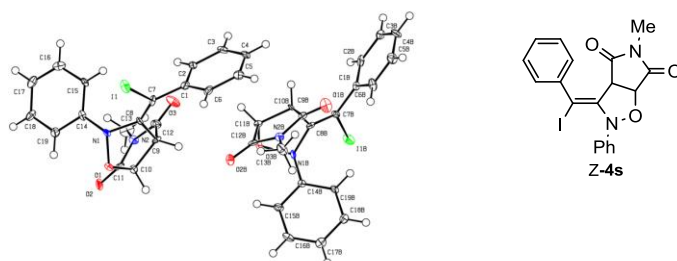

|                     |                                                                |
|---------------------|----------------------------------------------------------------|
| CCDC                | 2023473                                                        |
| Identification code | yst-I                                                          |
| Empirical formula   | C <sub>19</sub> H <sub>15</sub> IN <sub>2</sub> O <sub>3</sub> |

|                                             |                                                               |
|---------------------------------------------|---------------------------------------------------------------|
| Formula weight                              | 446.23                                                        |
| Temperature/K                               | 100.00(10)                                                    |
| Crystal system                              | orthorhombic                                                  |
| Space group                                 | Pca2 <sub>1</sub>                                             |
| a/Å                                         | 20.0555(10)                                                   |
| b/Å                                         | 7.4291(5)                                                     |
| c/Å                                         | 23.0509(12)                                                   |
| α/°                                         | 90                                                            |
| β/°                                         | 90                                                            |
| γ/°                                         | 90                                                            |
| Volume/Å <sup>3</sup>                       | 3434.5(3)                                                     |
| Z                                           | 8                                                             |
| ρ <sub>calc</sub> /cm <sup>3</sup>          | 1.726                                                         |
| μ/mm <sup>-1</sup>                          | 1.885                                                         |
| F(000)                                      | 1760.0                                                        |
| Crystal size/mm <sup>3</sup>                | 0.12 × 0.1 × 0.09                                             |
| Radiation                                   | MoKα (λ = 0.71073)                                            |
| 2θ range for data collection/°              | 4.43 to 49.988                                                |
| Index ranges                                | -23 ≤ h ≤ 22, -7 ≤ k ≤ 8, -27 ≤ l ≤ 26                        |
| Reflections collected                       | 9747                                                          |
| Independent reflections                     | 5136 [R <sub>int</sub> = 0.0322, R <sub>sigma</sub> = 0.0502] |
| Data/restraints/parameters                  | 5136/19/453                                                   |
| Goodness-of-fit on F <sup>2</sup>           | 1.026                                                         |
| Final R indexes [I >= 2σ (I)]               | R <sub>1</sub> = 0.0330, wR <sub>2</sub> = 0.0638             |
| Final R indexes [all data]                  | R <sub>1</sub> = 0.0404, wR <sub>2</sub> = 0.0678             |
| Largest diff. peak/hole / e Å <sup>-3</sup> | 0.77/-0.71                                                    |
| Flack parameter                             | 0.26(3)                                                       |

## 4.2 Crystal data and structure refinement for Z-5h

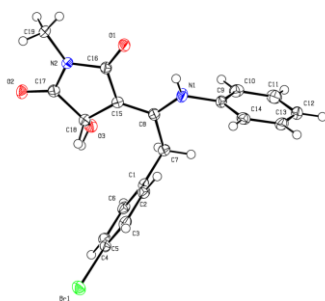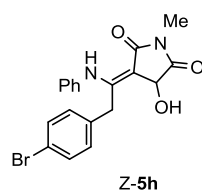

|                     |                                                                 |
|---------------------|-----------------------------------------------------------------|
| CCDC                | 2023472                                                         |
| Identification code | 9st229                                                          |
| Empirical formula   | C <sub>19</sub> H <sub>17</sub> BrN <sub>2</sub> O <sub>3</sub> |

|                                             |                                                               |
|---------------------------------------------|---------------------------------------------------------------|
| Formula weight                              | 401.25                                                        |
| Temperature/K                               | 100.00(10)                                                    |
| Crystal system                              | monoclinic                                                    |
| Space group                                 | P2 <sub>1</sub> /n                                            |
| a/Å                                         | 12.4819(3)                                                    |
| b/Å                                         | 5.4926(2)                                                     |
| c/Å                                         | 25.2518(7)                                                    |
| $\alpha$ /°                                 | 90                                                            |
| $\beta$ /°                                  | 101.834(3)                                                    |
| $\gamma$ /°                                 | 90                                                            |
| Volume/Å <sup>3</sup>                       | 1694.42(9)                                                    |
| Z                                           | 4                                                             |
| $\rho_{\text{calc}}/\text{cm}^3$            | 1.573                                                         |
| $\mu/\text{mm}^{-1}$                        | 3.488                                                         |
| F(000)                                      | 816.0                                                         |
| Crystal size/mm <sup>3</sup>                | 0.12 × 0.11 × 0.1                                             |
| Radiation                                   | CuK $\alpha$ ( $\lambda$ = 1.54184)                           |
| 2 $\theta$ range for data collection/°      | 7.154 to 147.156                                              |
| Index ranges                                | -15 ≤ h ≤ 14, -3 ≤ k ≤ 6, -31 ≤ l ≤ 25                        |
| Reflections collected                       | 5983                                                          |
| Independent reflections                     | 3295 [R <sub>int</sub> = 0.0302, R <sub>sigma</sub> = 0.0406] |
| Data/restraints/parameters                  | 3295/0/228                                                    |
| Goodness-of-fit on F <sup>2</sup>           | 1.047                                                         |
| Final R indexes [I >= 2 $\sigma$ (I)]       | R <sub>1</sub> = 0.0308, wR <sub>2</sub> = 0.0772             |
| Final R indexes [all data]                  | R <sub>1</sub> = 0.0374, wR <sub>2</sub> = 0.0817             |
| Largest diff. peak/hole / e Å <sup>-3</sup> | 0.36/-0.37                                                    |

## 5. Copies of NMR spectrum

*(Z)*-3-(bromo(phenyl)methylene)-5-methyl-2-phenyltetrahydro-4*H*-pyrrolo[3,4-*d*]isoxazole-4,6(5*H*)-dione (**Z-4a**)

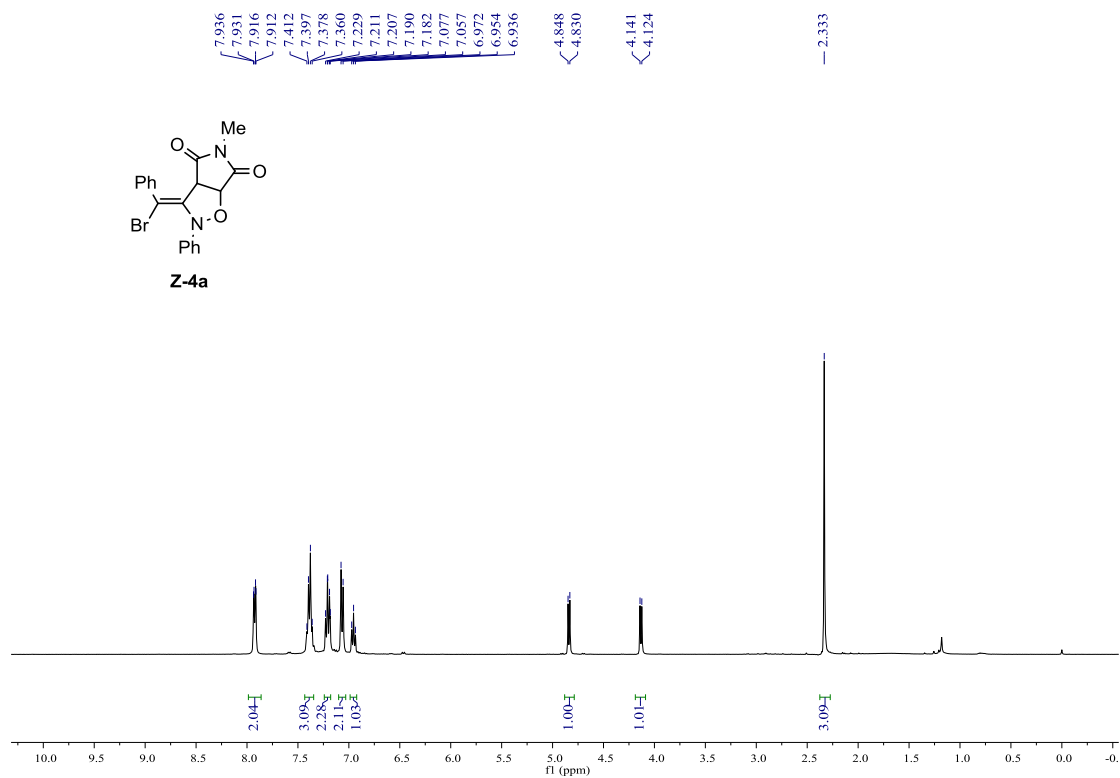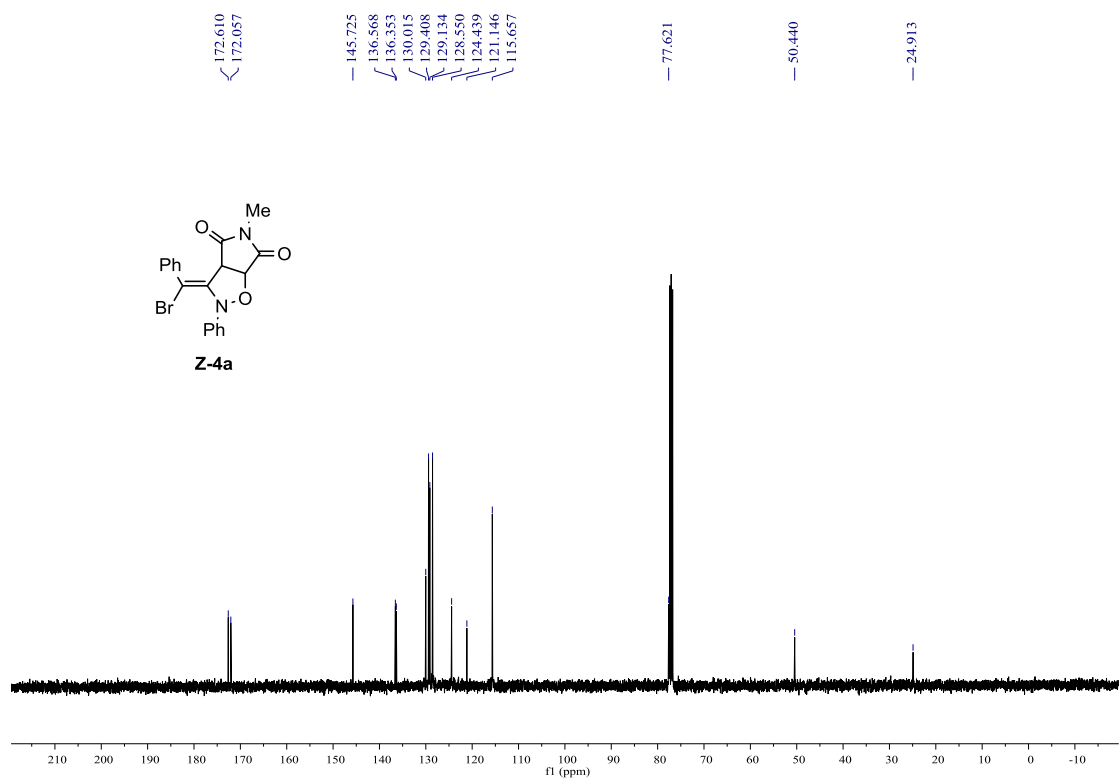



**3-(bromo(phenyl)methylene)-5-methyl-2-phenyltetrahydro-4H-pyrrolo[3,4-d]isoxazole-4,6(5H)-dione (4a)**

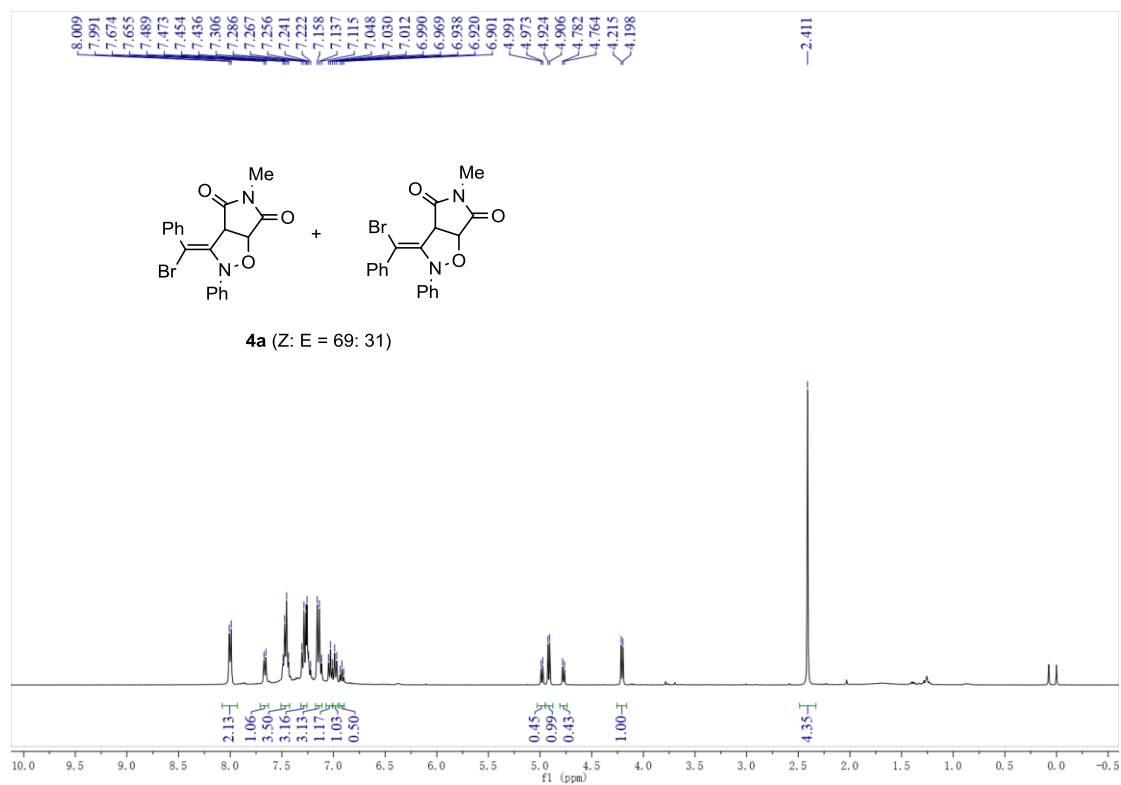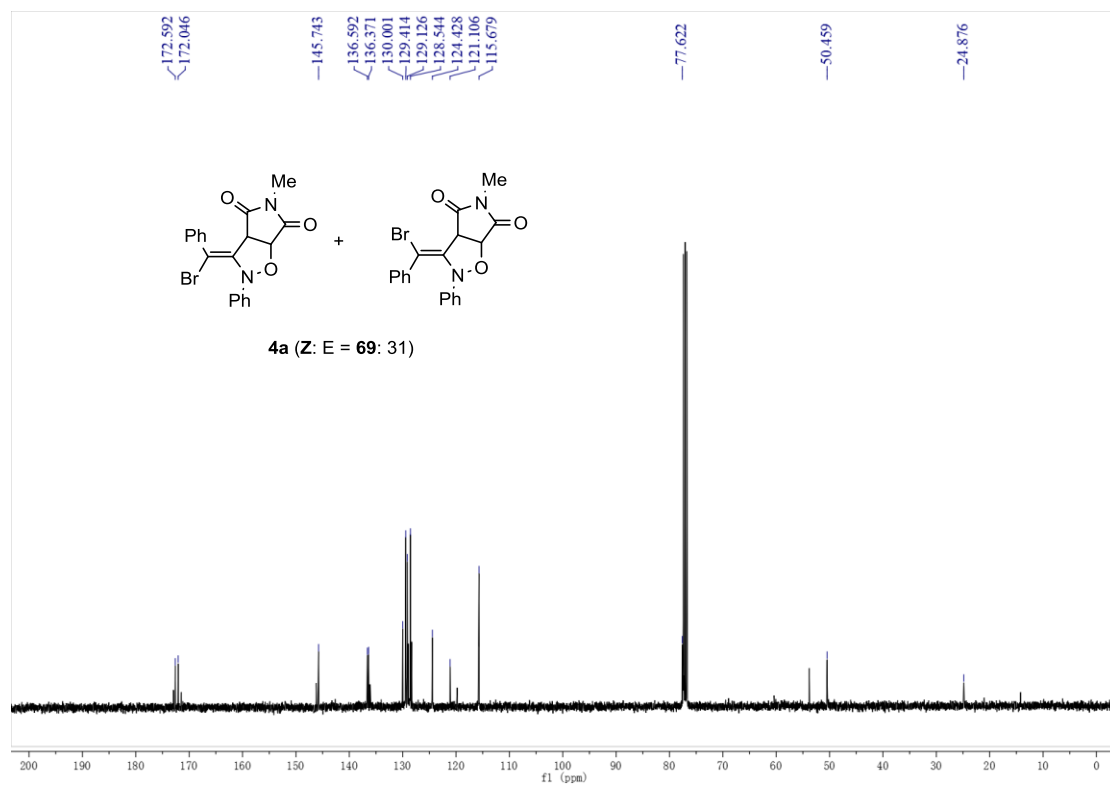

**3-(bromo(phenyl)methylene)-5-(tert-butyl)-2-phenyltetrahydro-4H-pyrrolo[3,4-d]isoxazole-4,6(5H)-dione (4b)**

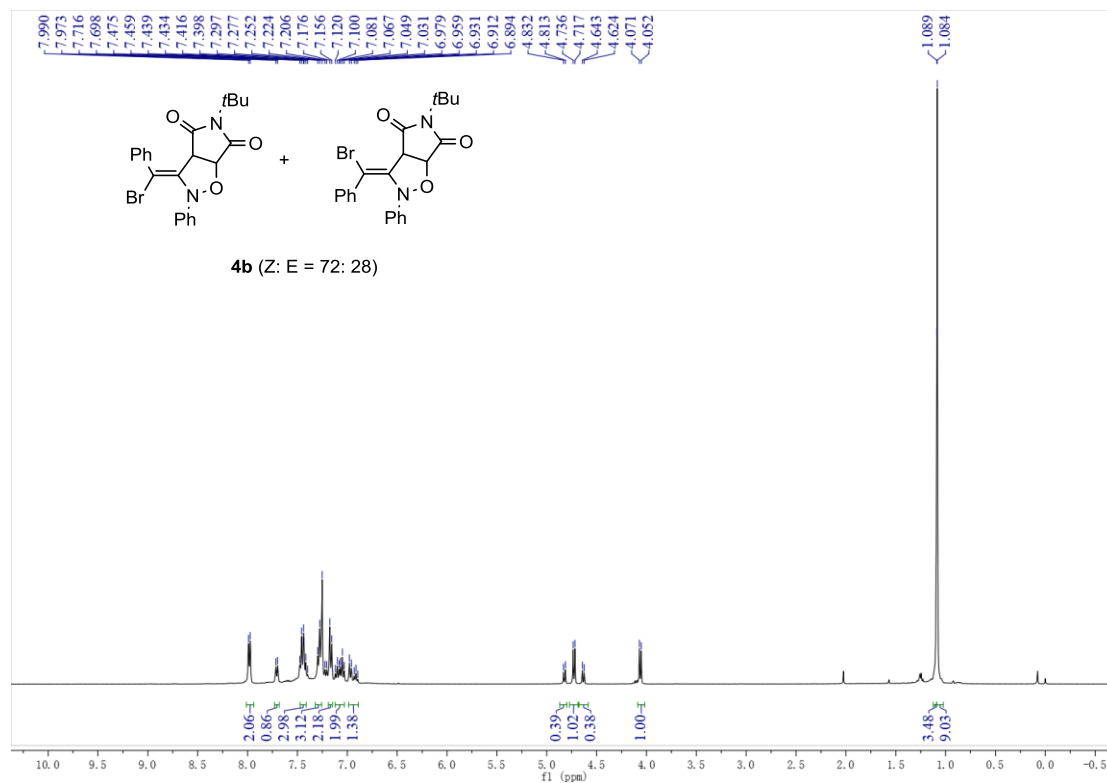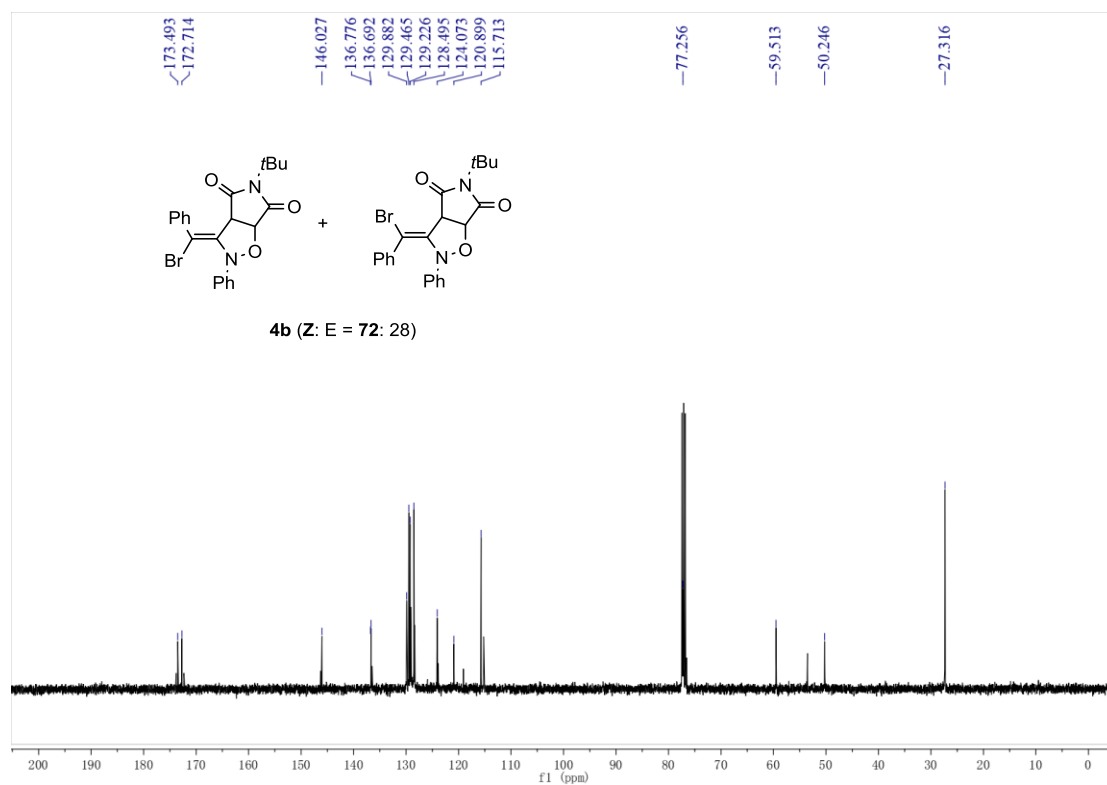

**3-(bromo(phenyl)methylene)-5-ethyl-2-phenyltetrahydro-4H-pyrrolo[3,4-d]isoxazole-4,6(5H)-dione (4c)**

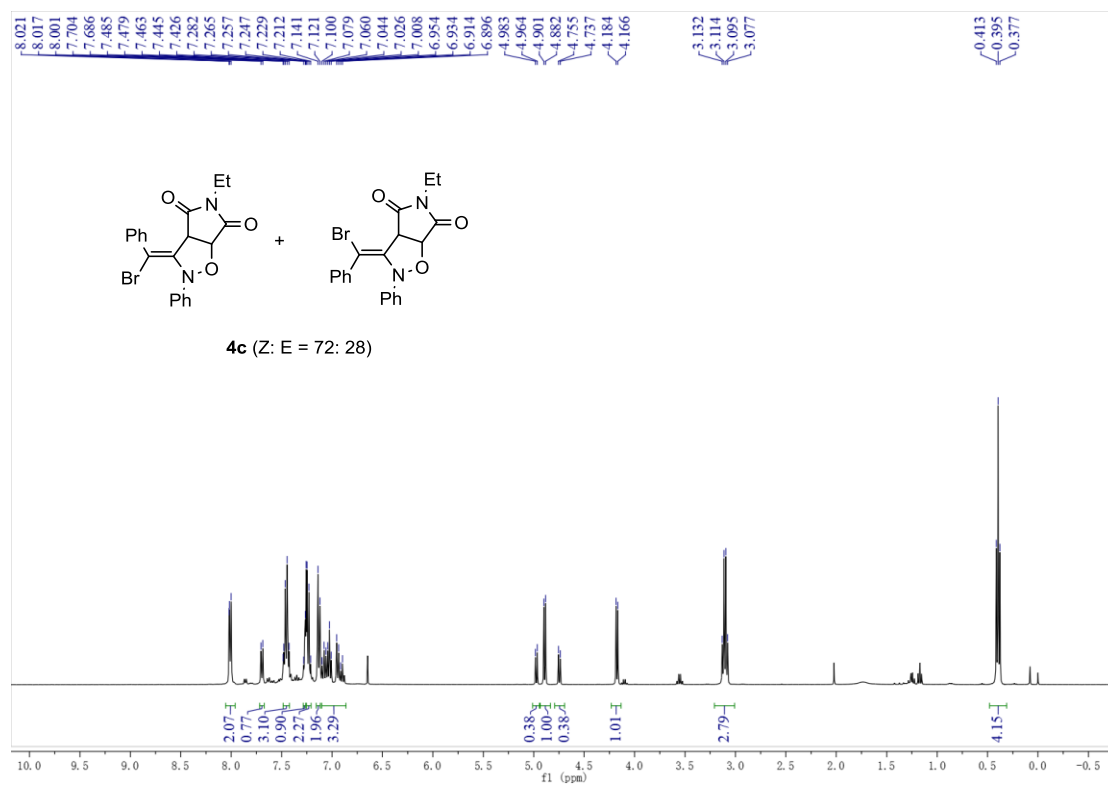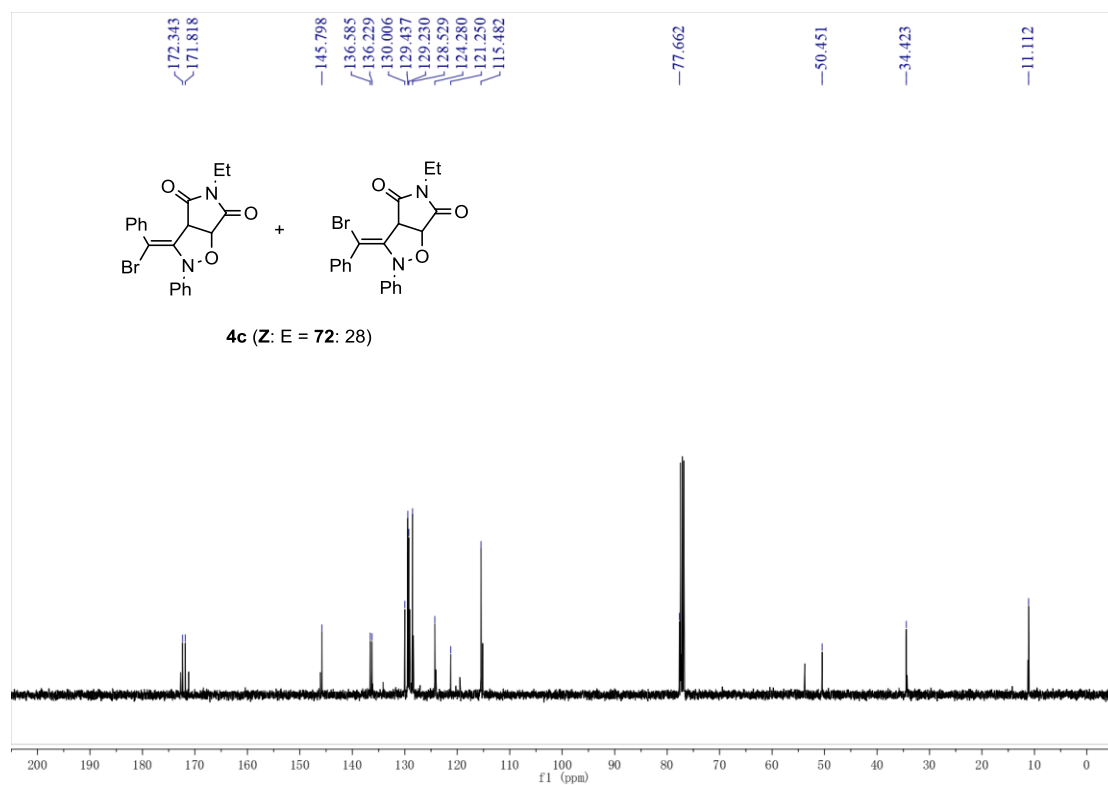

**3-(bromo(phenyl)methylene)-2,5-diphenyltetrahydro-4H-pyrrolo[3,4-d]isoxazole-4,6(5H)-dione (4d)**

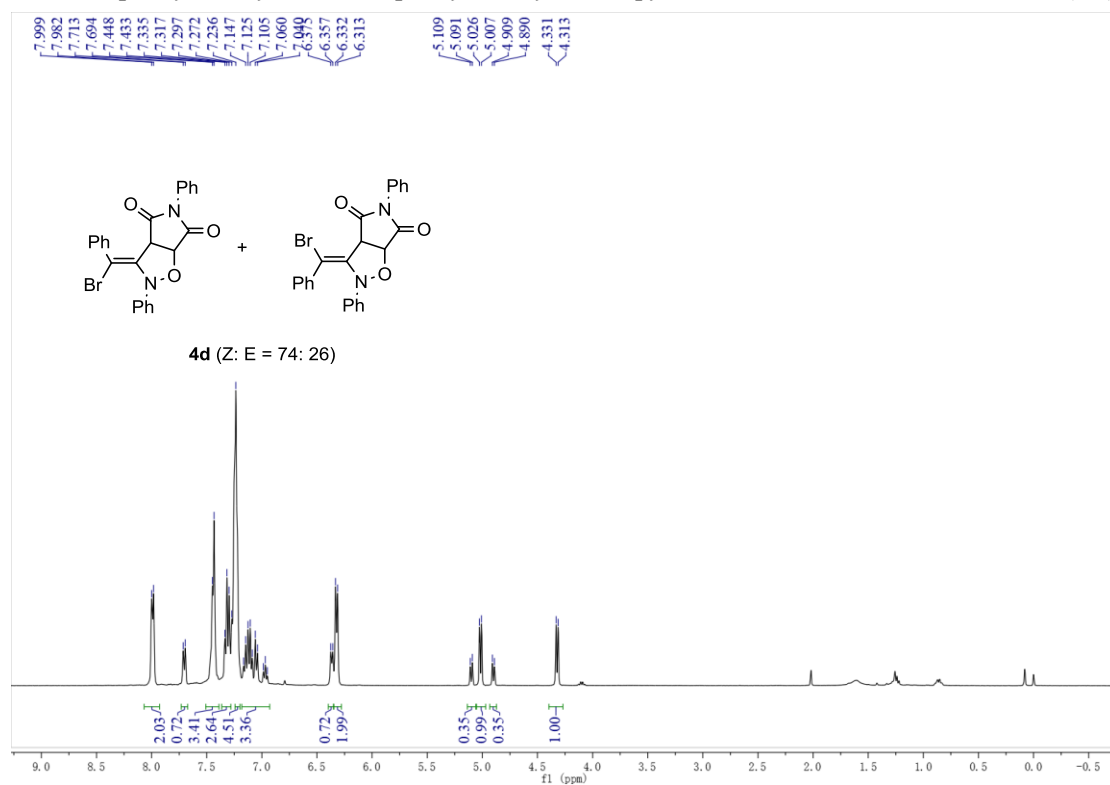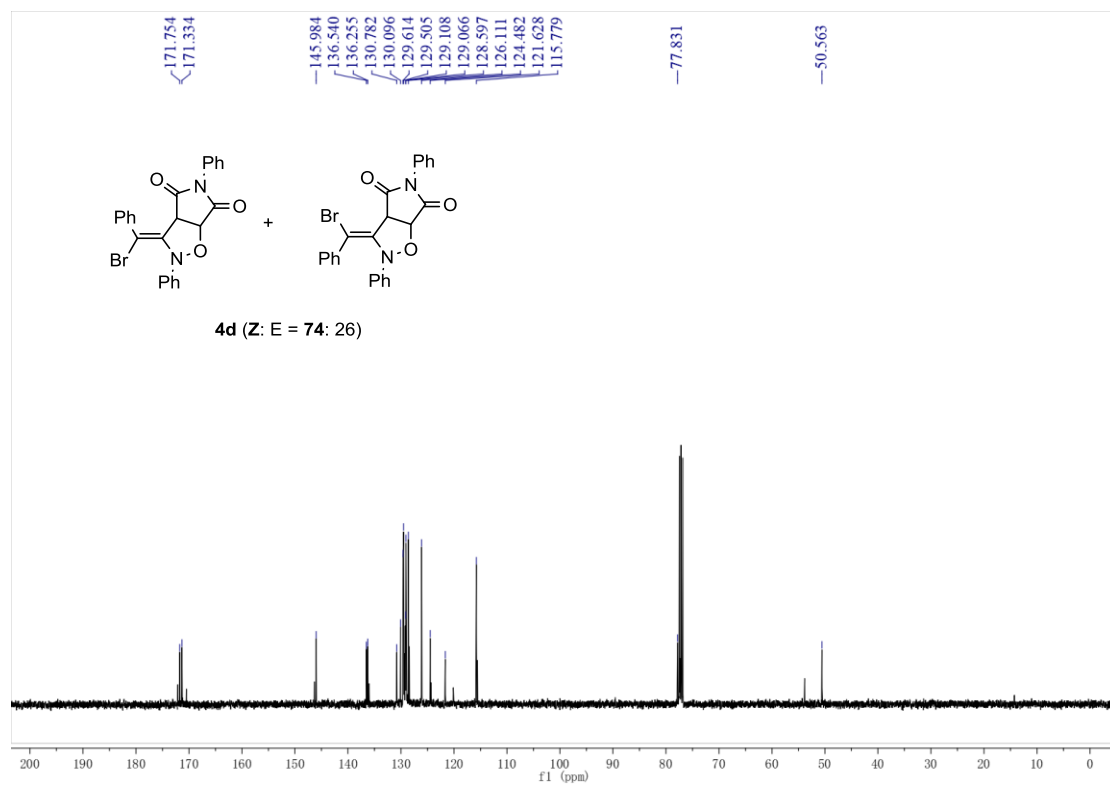

**(Z)-3-(bromo(phenyl)methylene)-2-phenyltetrahydro-4H-pyrrolo[3,4-d]isoxazole-4,6(5H)-dione (4e)**

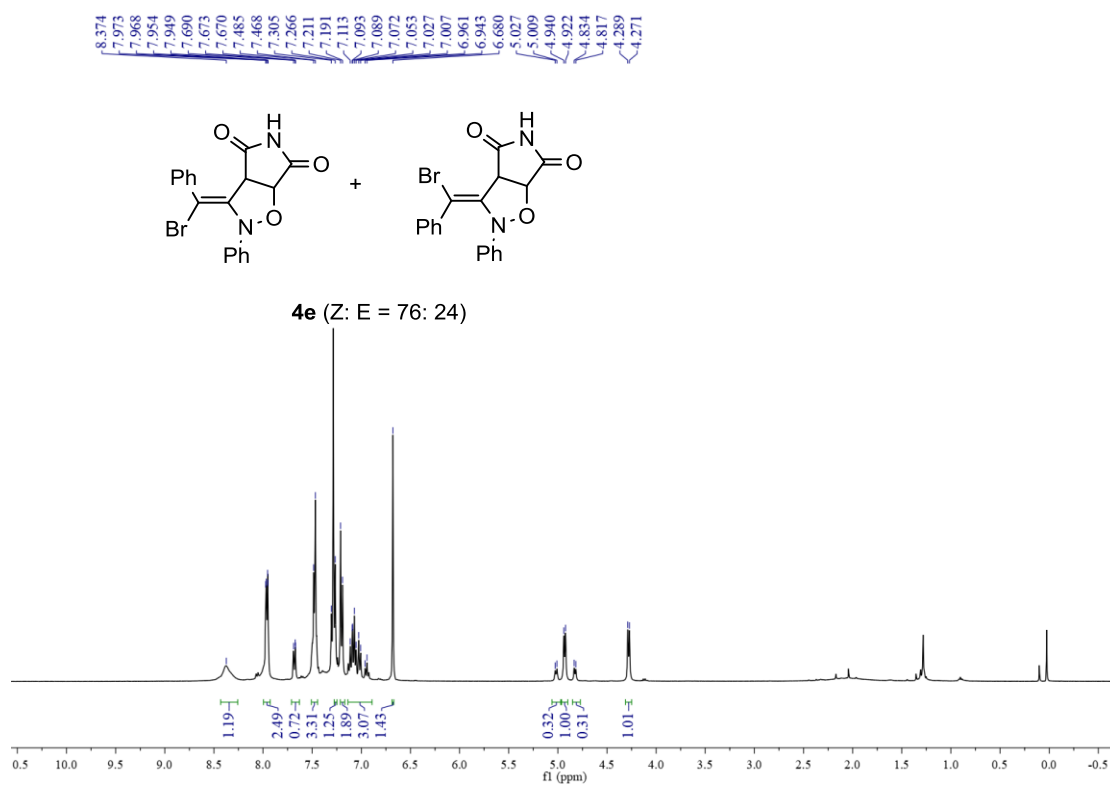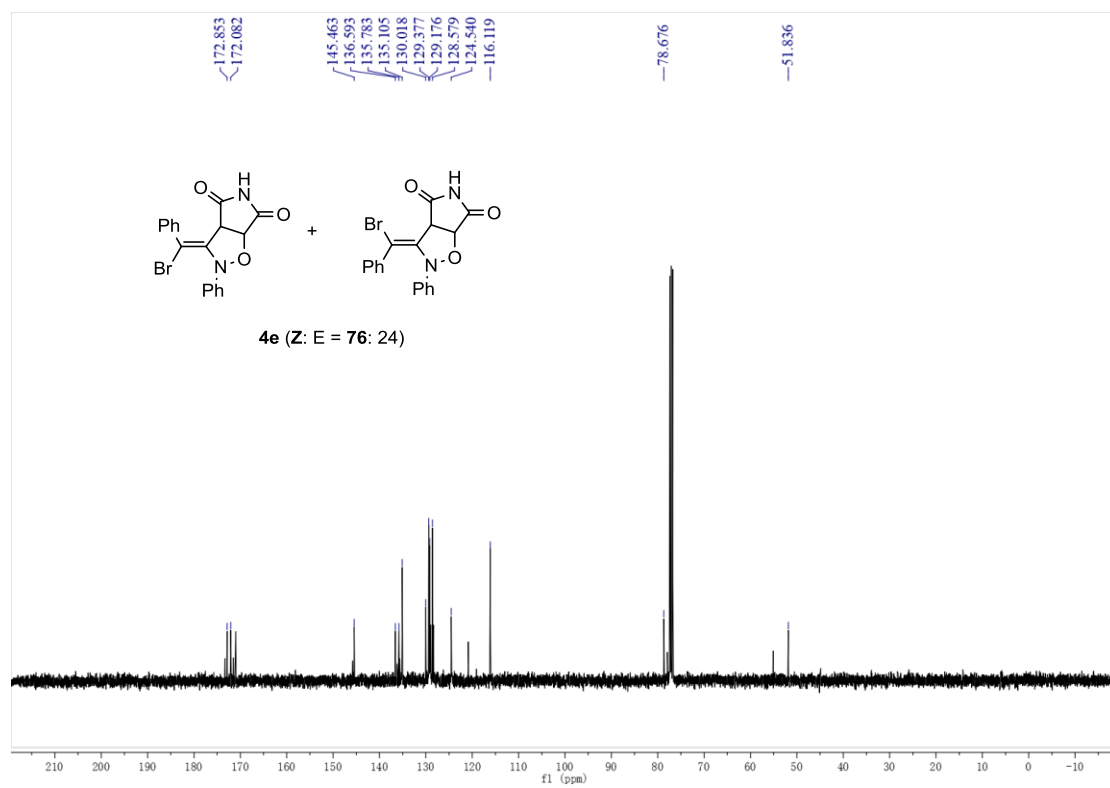

**3-(bromo(4-chlorophenyl)methylene)-5-methyl-2-phenyltetrahydro-4H-pyrrolo[3,4-d]isoxazole-4,6(5H)-dione (4f)**

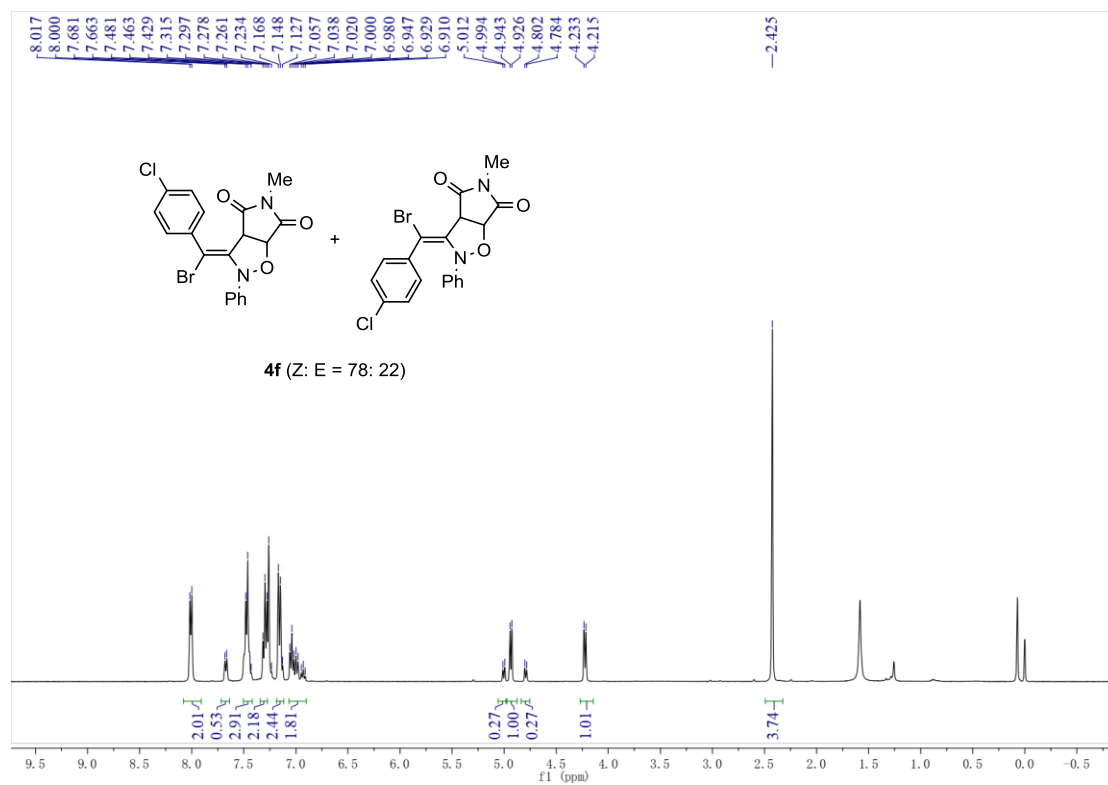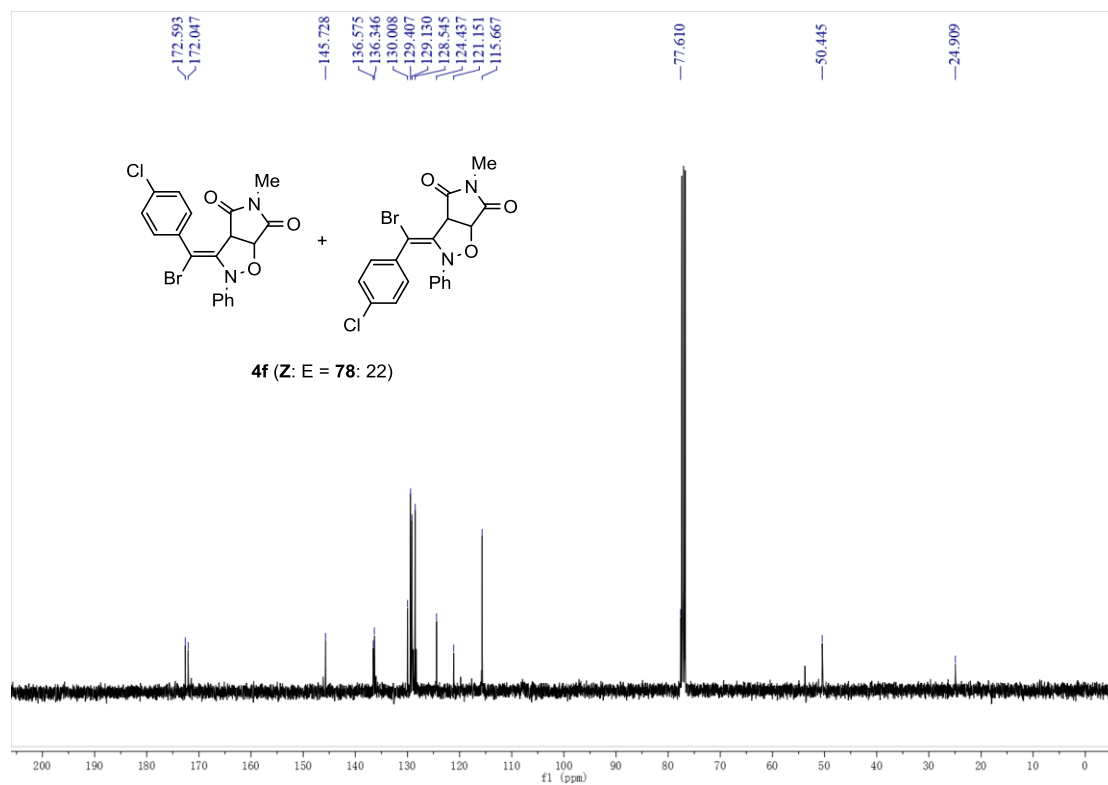

**(Z)-3-(bromo(4-fluorophenyl)methylene)-5-methyl-2-phenyltetrahydro-4H-pyrrolo[3,4-d]isoxazole-4,6(5H)-dione (Z-4g)**

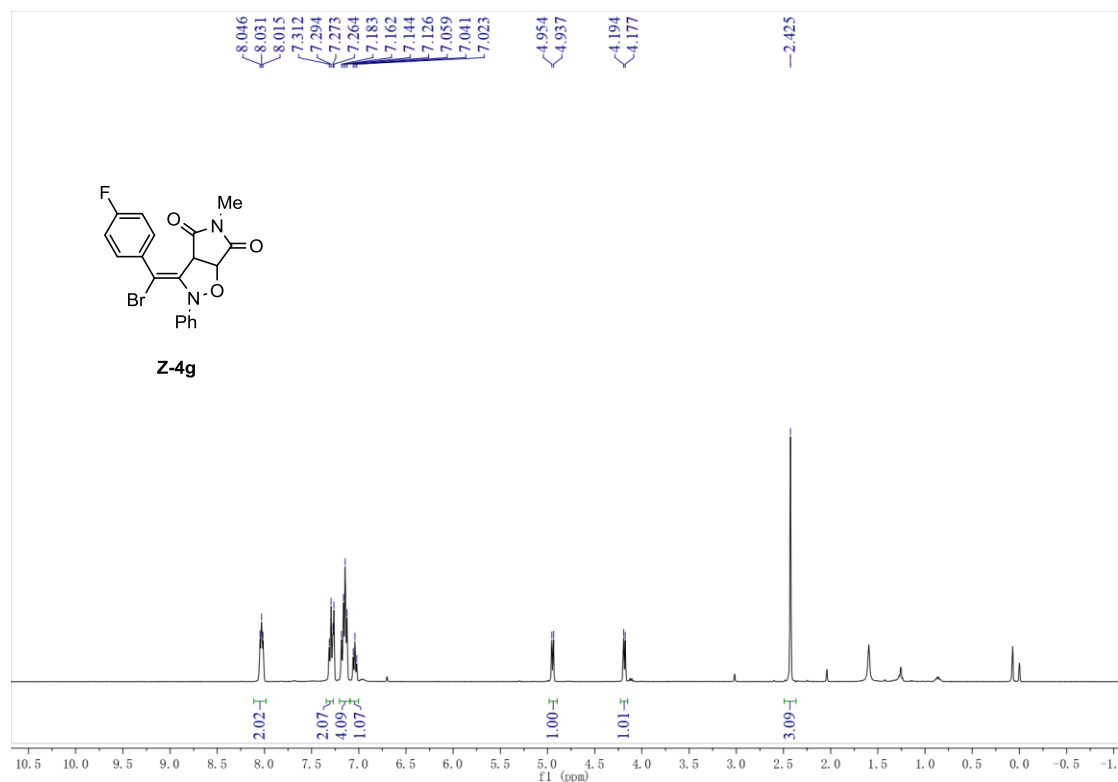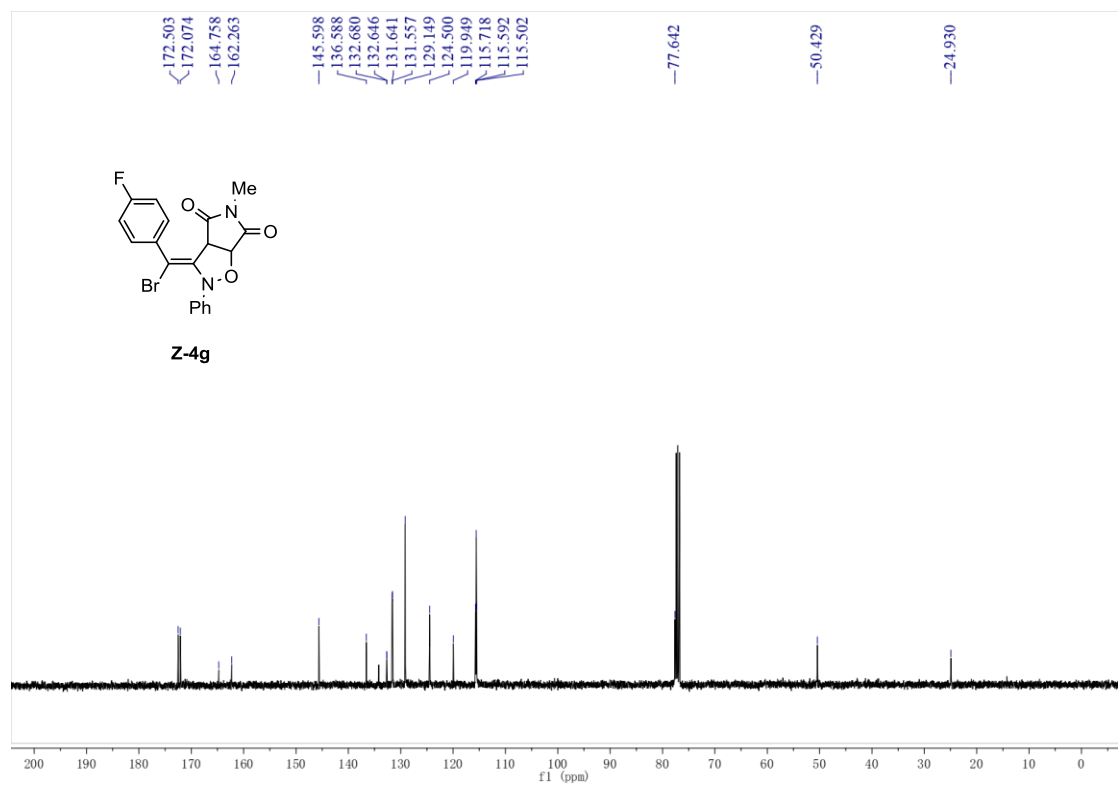

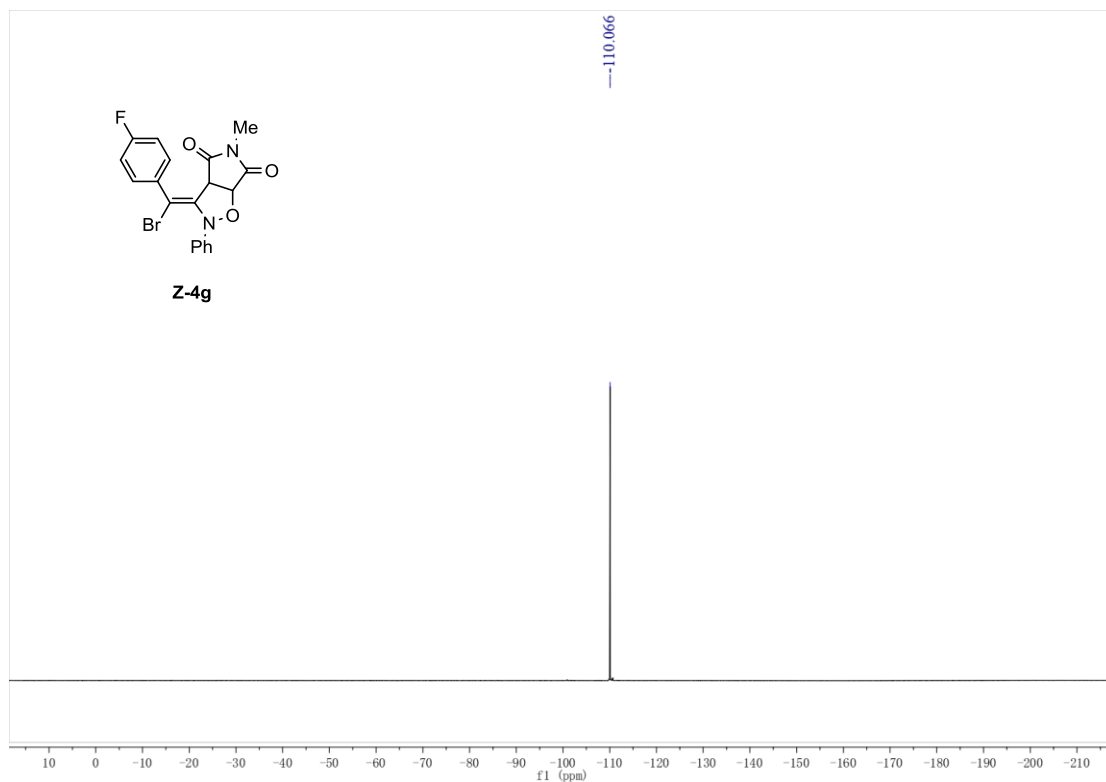

**(E)-3-(bromo(4-fluorophenyl)methylene)-5-methyl-2-phenyltetrahydro-4H-pyrrolo[3,4-d]isoxazole-4,6(5H)-dione (E-4g)**

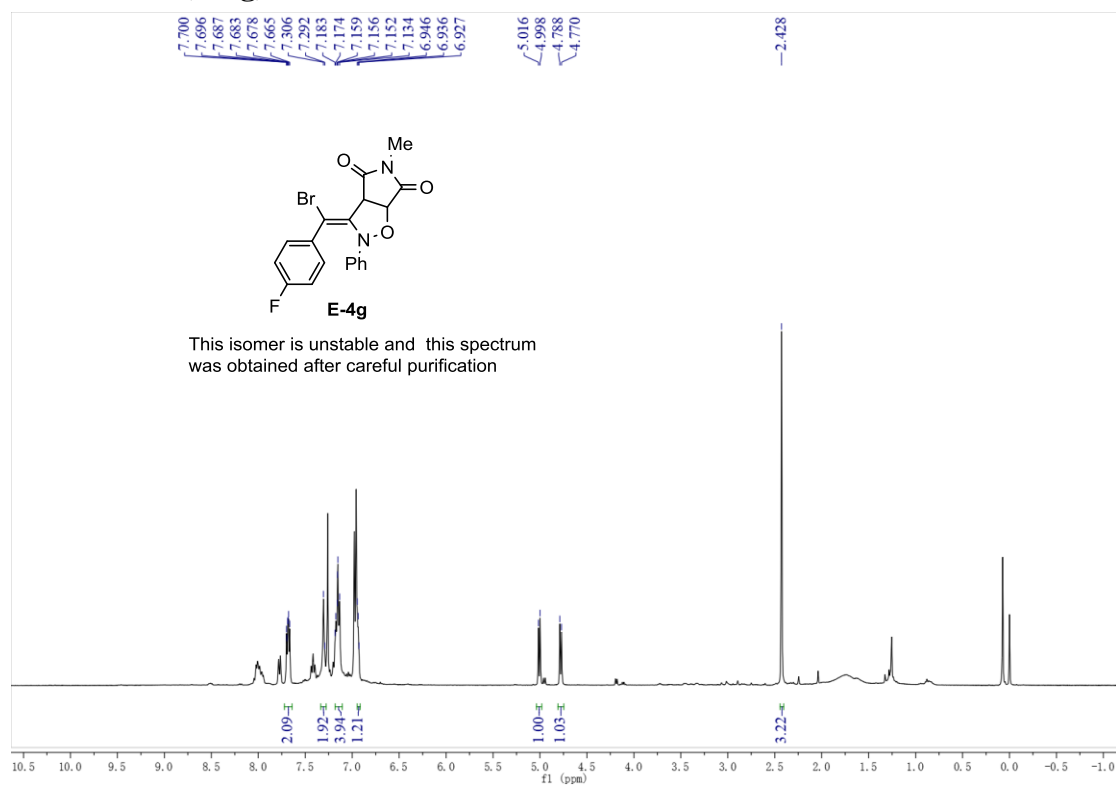



**(Z)-3-(bromo(4-bromophenyl)methylene)-5-methyl-2-phenyltetrahydro-4H-pyrrolo[3,4-d]isoxazole-4,6(5H)-dione (Z-4h)**

7.916  
7.899  
7.618  
7.601  
7.308  
7.291  
7.276  
7.132  
7.115  
7.108  
7.056  
7.042  
7.028

4.951  
4.937

4.191  
4.177

2.426

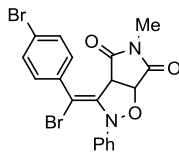

**Z-4h**

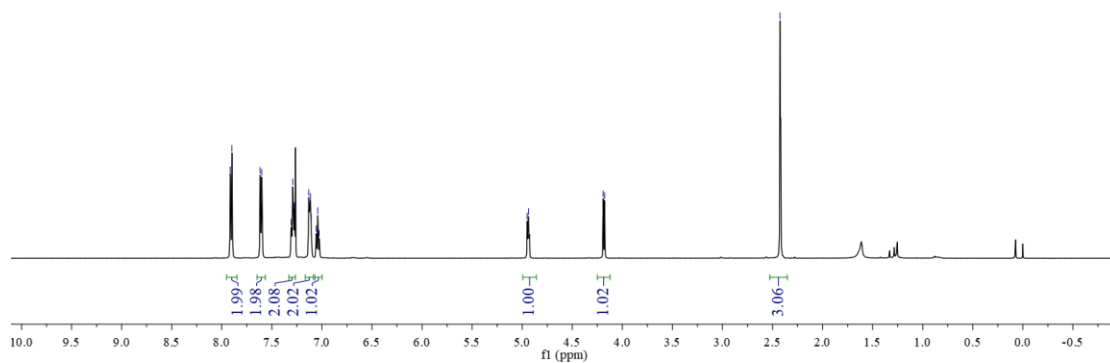

172.432  
171.948

145.498  
136.831  
135.466  
131.777  
131.042  
129.177  
124.567  
124.476  
119.730  
115.629

77.576

50.473

24.964

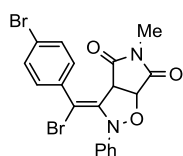

**Z-4h**

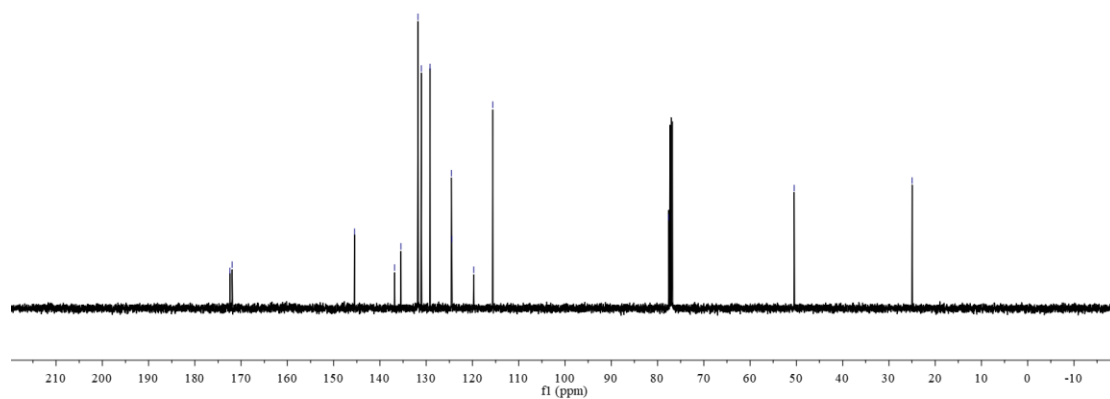

**(E)-3-(bromo(4-bromophenyl)methylene)-5-methyl-2-phenyltetrahydro-4H-pyrrolo[3,4-d]isoxazole-4,6(5H)-dione (E-4h)**

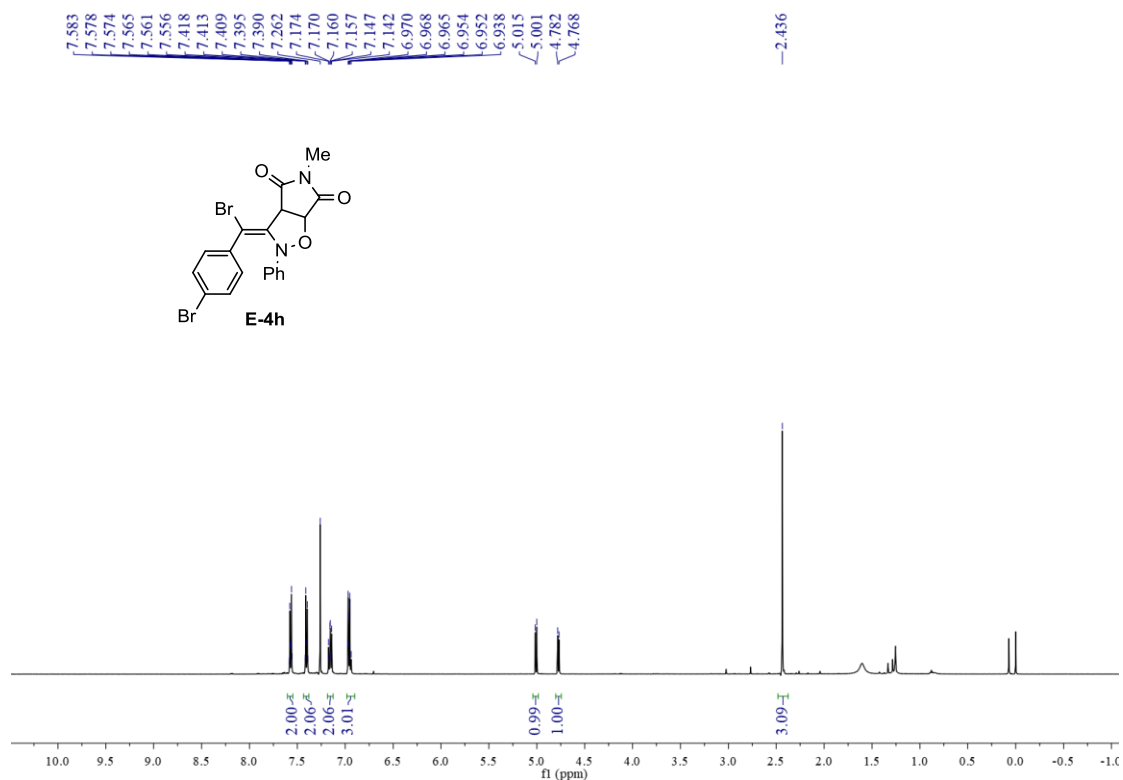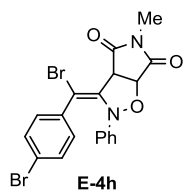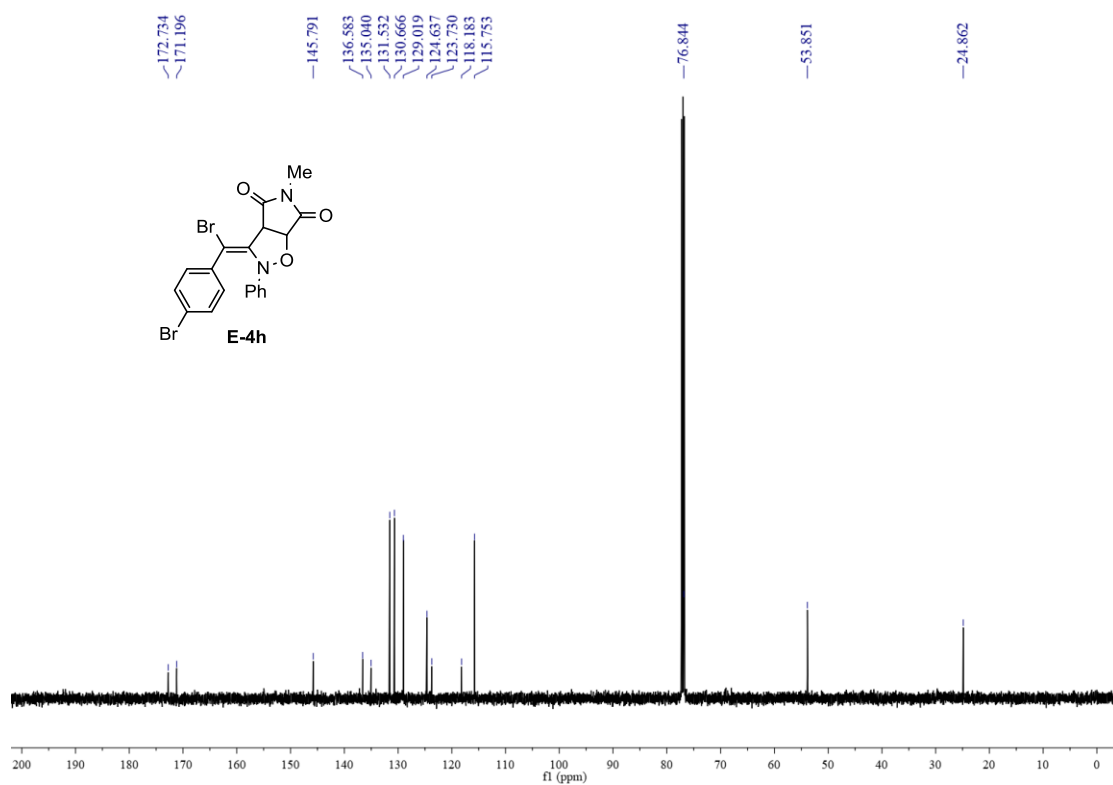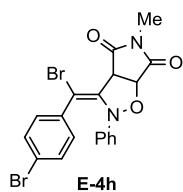

**3-(bromo(4-ethylphenyl)methylene)-5-methyl-2-phenyltetrahydro-4H-pyrrolo[3,4-d]isoxazole-4,6(5H)-dione (4i)**

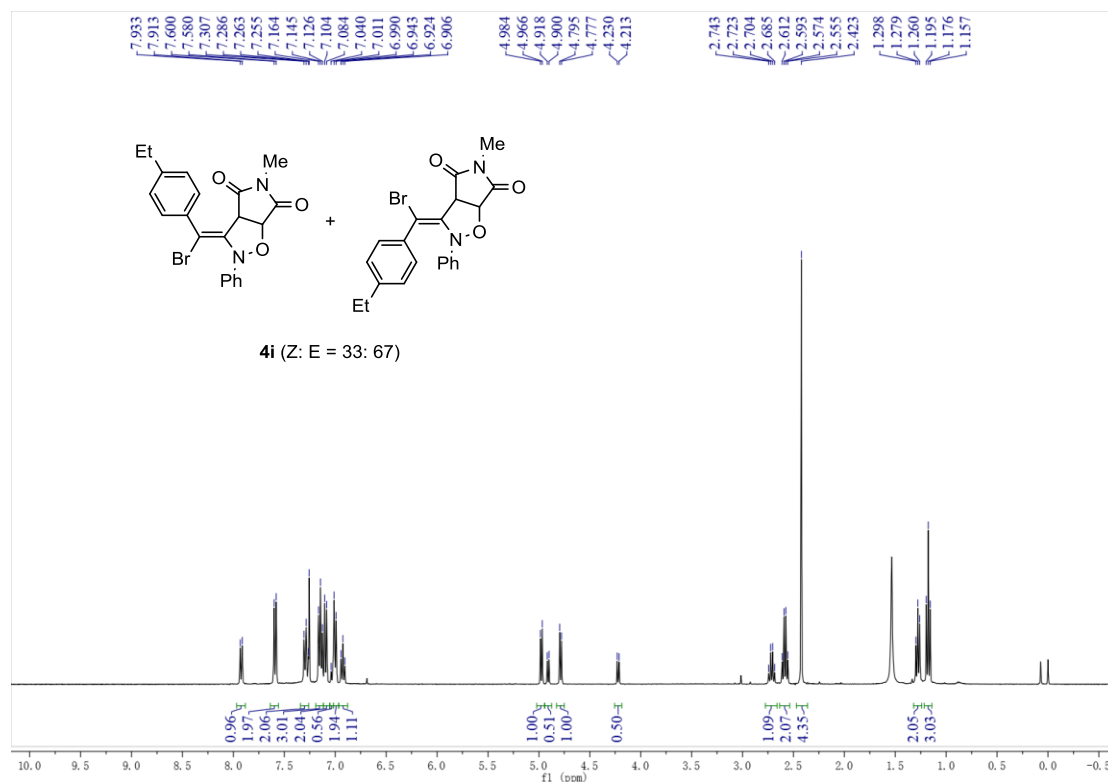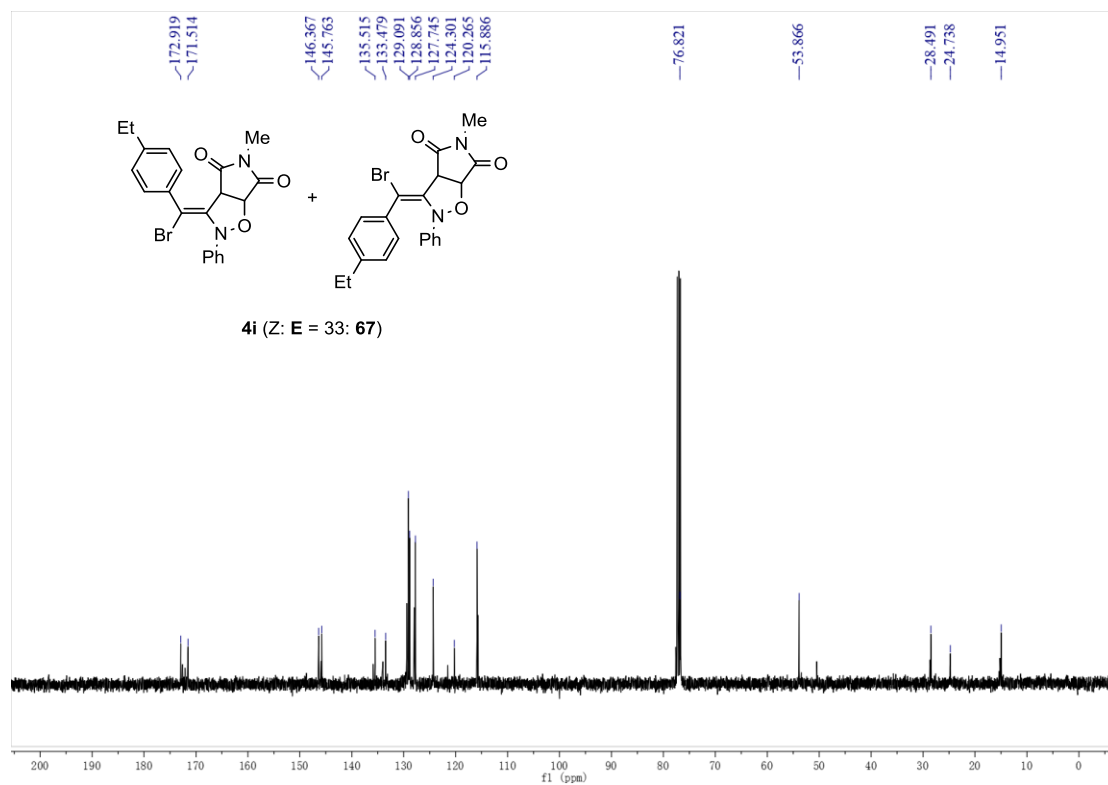

**3-(bromo(*m*-tolyl)methylene)-5-methyl-2-phenyltetrahydro-4H-pyrrolo[3,4-*d*]isoxazole-4,6(5H)-dione (4j)**

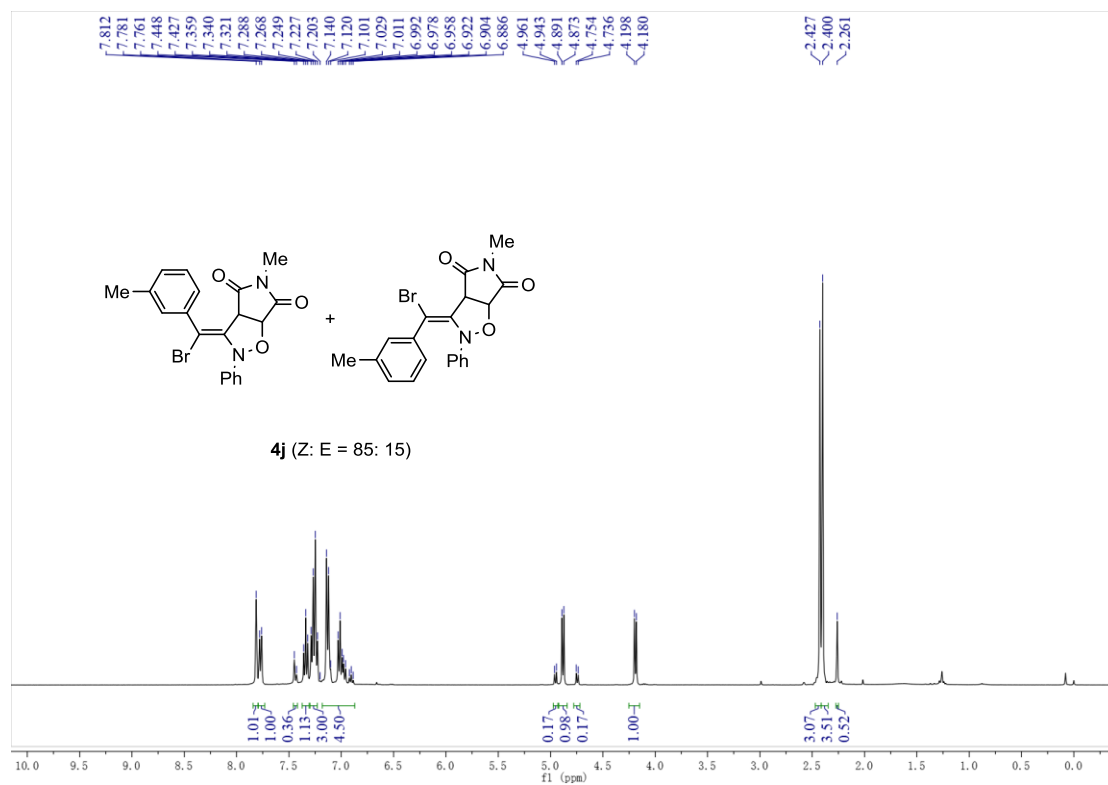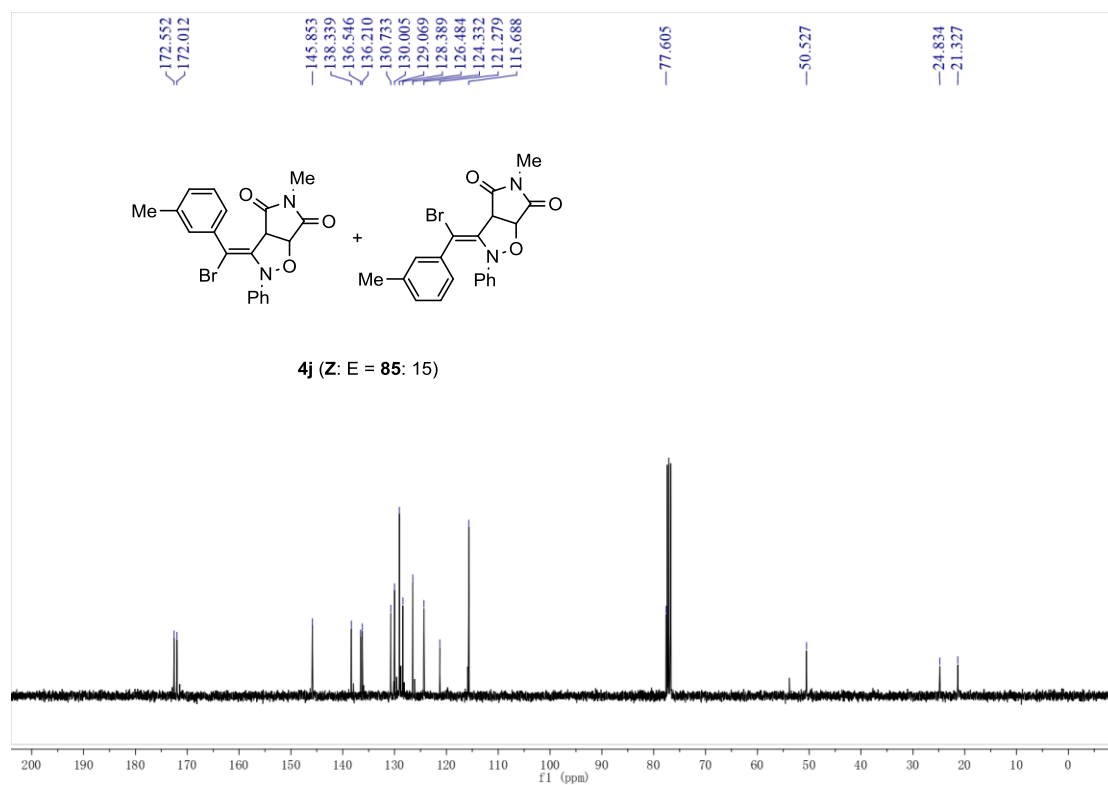

**3-(bromo(*o*-tolyl)methylene)-5-methyl-2-phenyltetrahydro-4H-pyrrolo[3,4-*d*]isoxazole-4,6(5H)-dione (4k)**

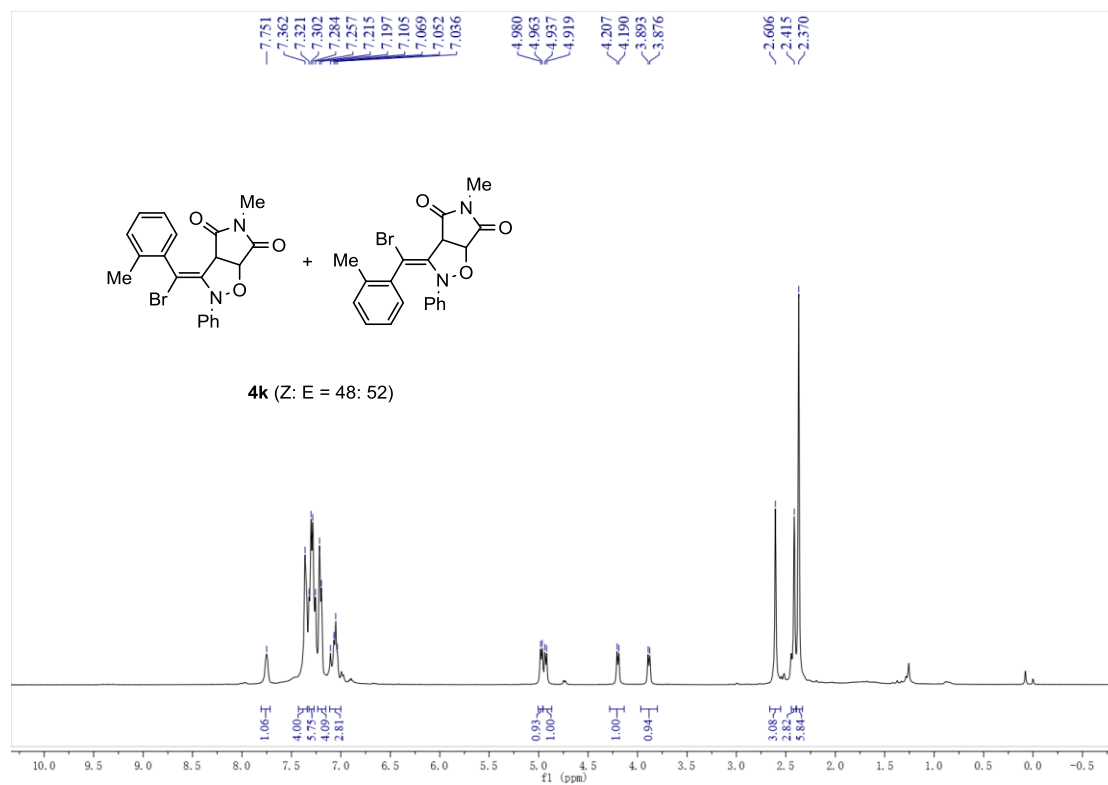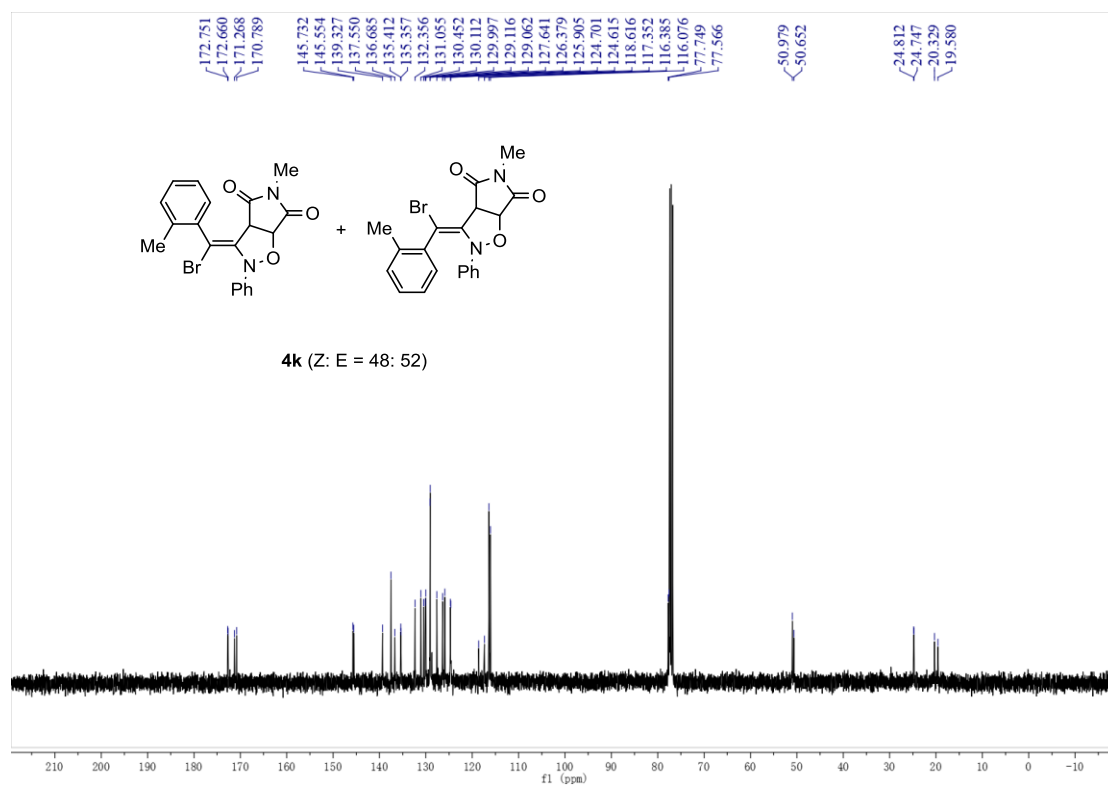

**(Z)-3-(bromo(4-ethoxyphenyl)methylene)-5-methyl-2-phenyltetrahydro-4H-pyrrolo[3,4-d]isoxazole-4,6(5H)-dione (Z-4I)**

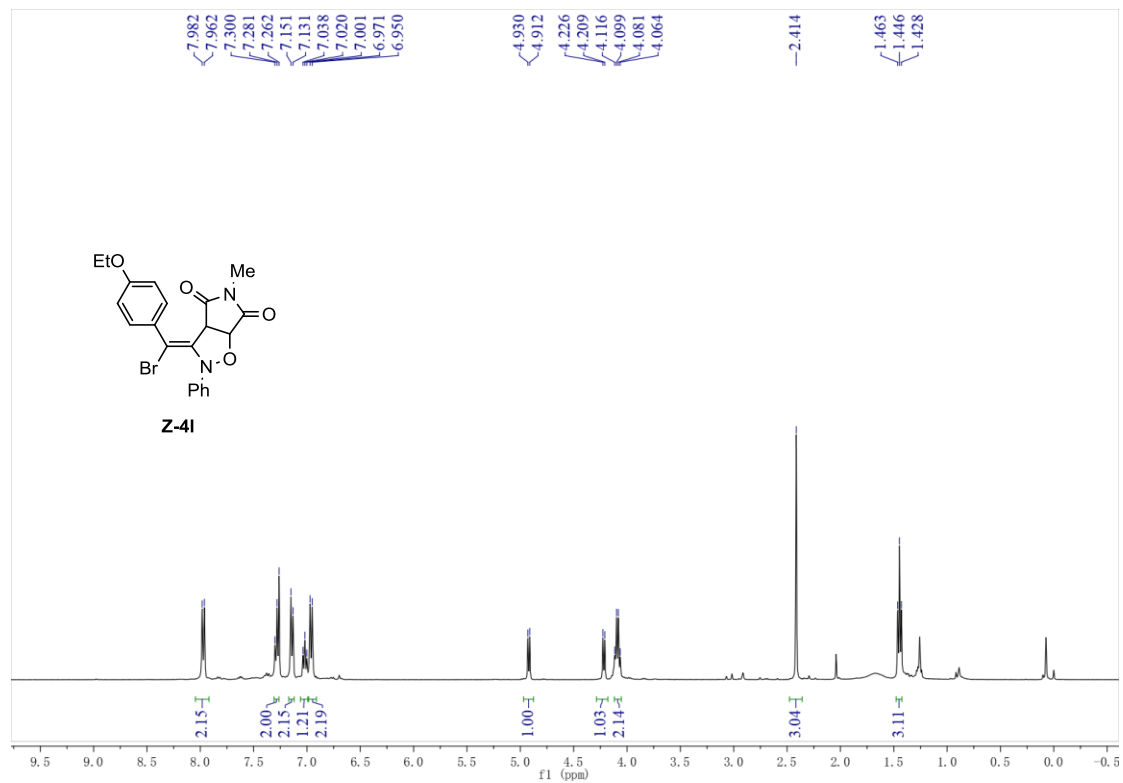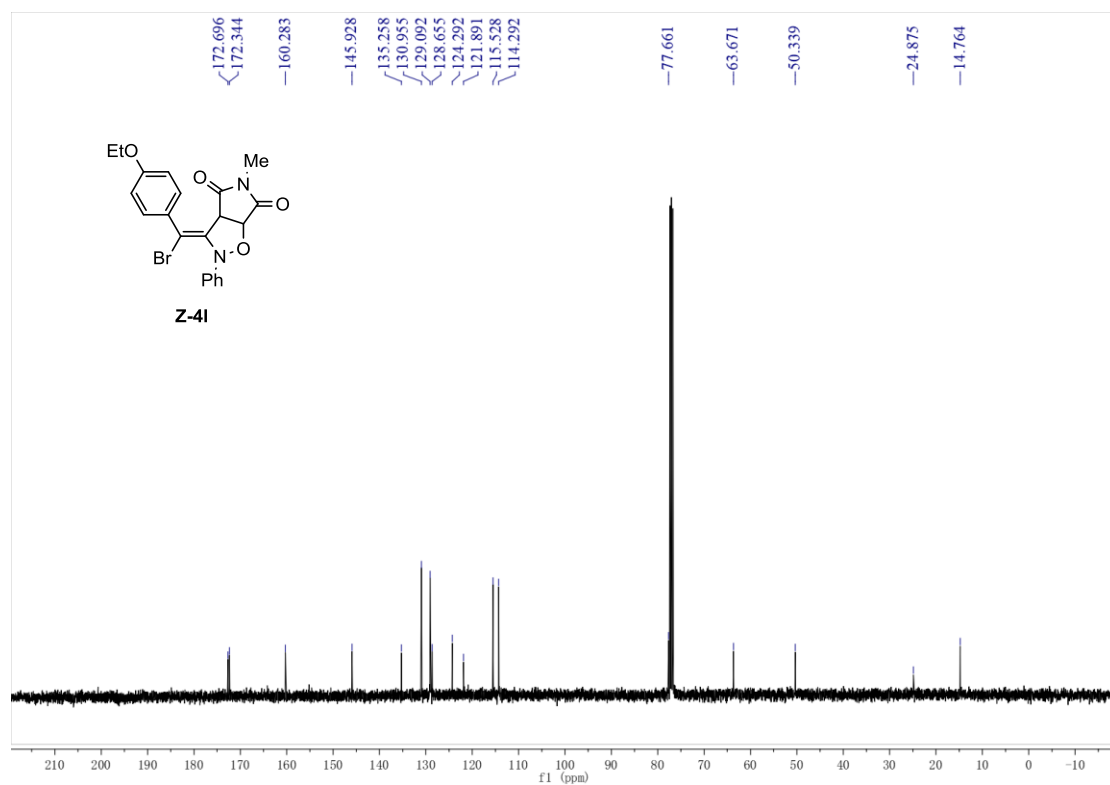

**(Z)-3-(benzo[d][1,3]dioxol-5-ylbromomethylene)-5-methyl-2-phenyltetrahydro-4H-pyrrolo[3,4-d]-isoxazole-4,6(5H)-dione (Z-4m)**

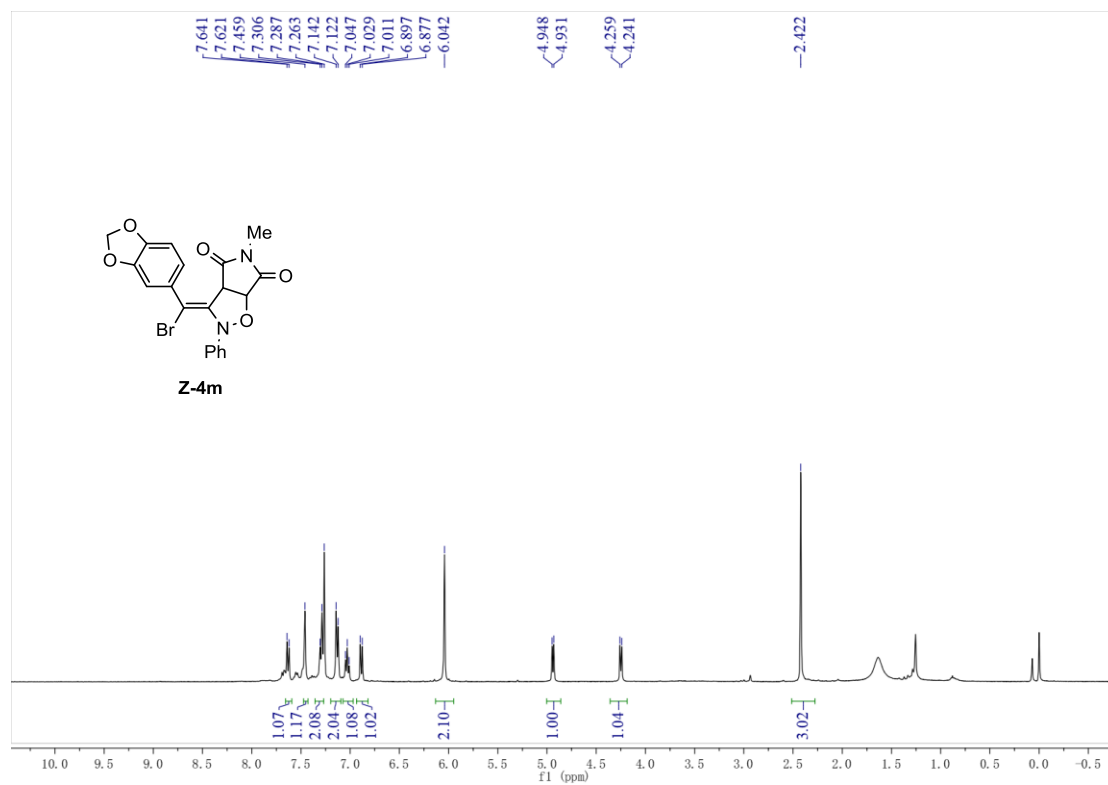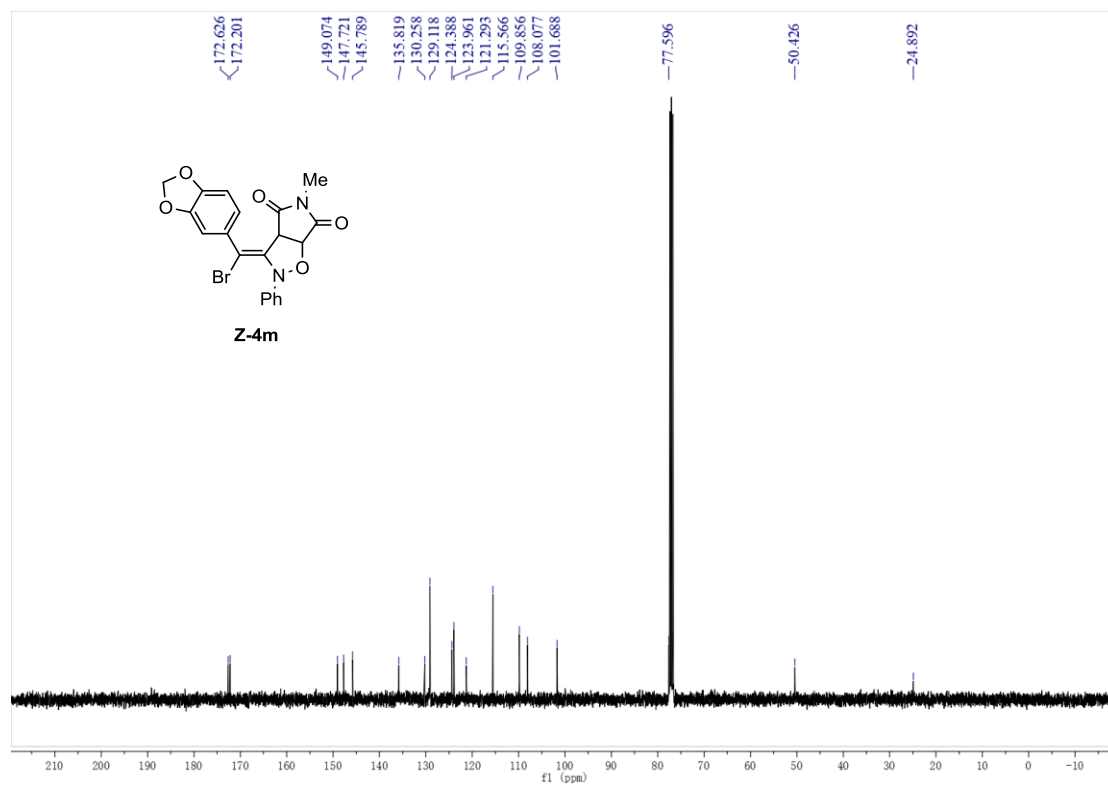

**3-(bromo(naphthalen-1-yl)methylene)-5-methyl-2-phenyltetrahydro-4H-pyrrolo[3,4-d]isoxazole-4,6(5H)-dione (4n)**

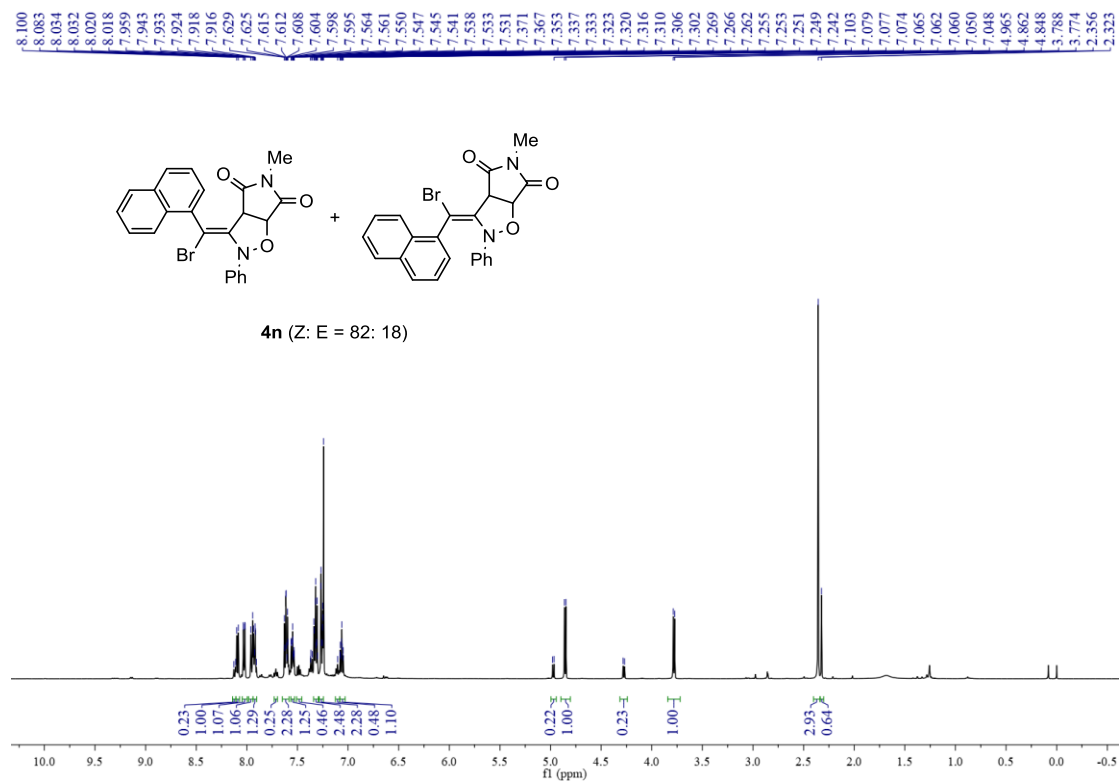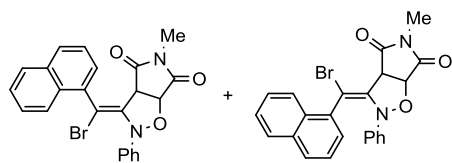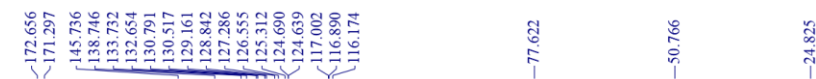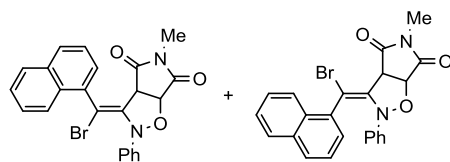

**4n (Z: E = 82: 18)**

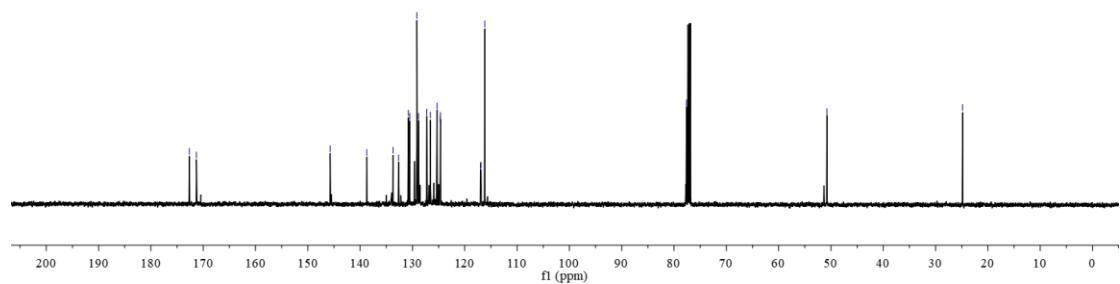



**3-(bromo(thiophen-3-yl)methylene)-5-methyl-2-phenyltetrahydro-4H-pyrrolo[3,4-d]isoxazole-4,6(5H)-dione (4o)**

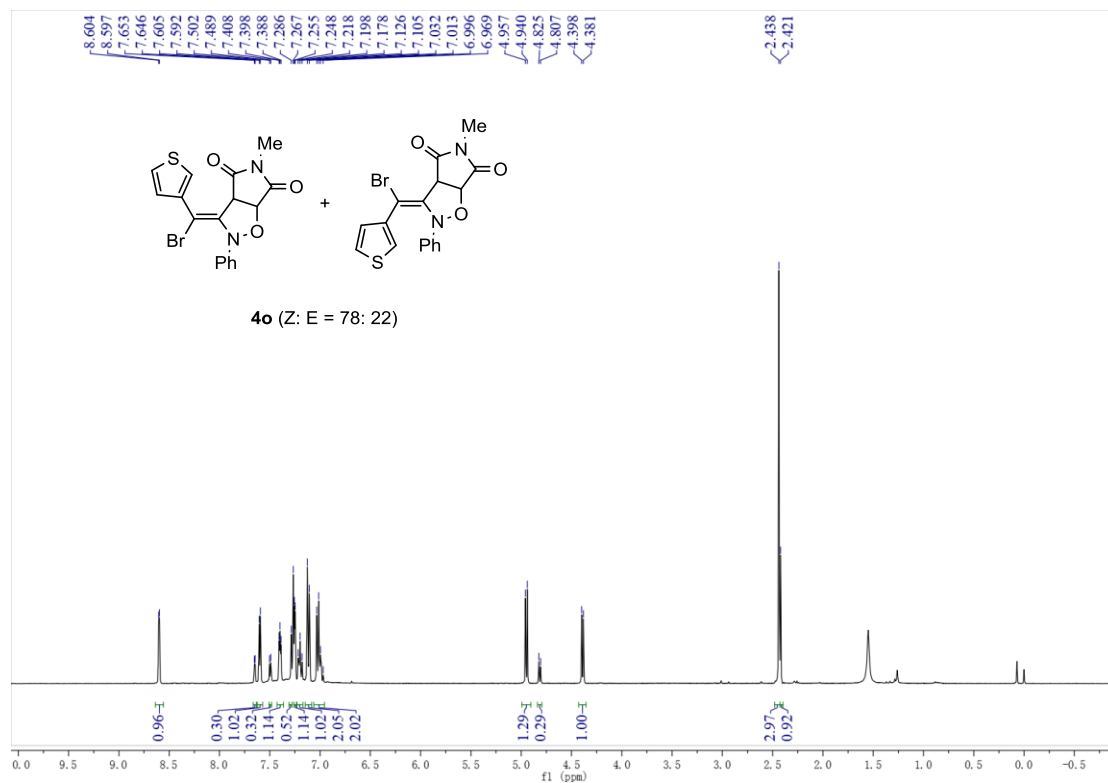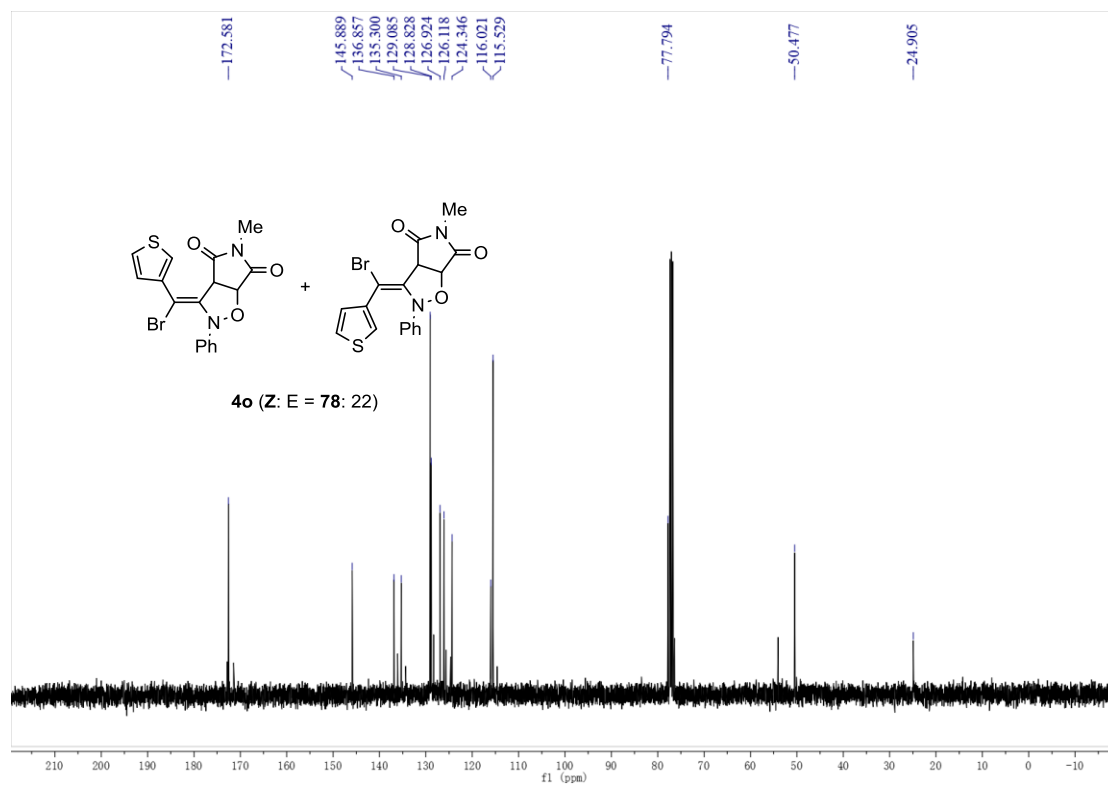

**(Z)-3-(bromo(1-tosyl-1H-indol-3-yl)methylene)-5-methyl-2-phenyltetrahydro-4H-pyrrolo[3,4-d]-isoxazole-4,6(5H)-dione (Z-4p)**

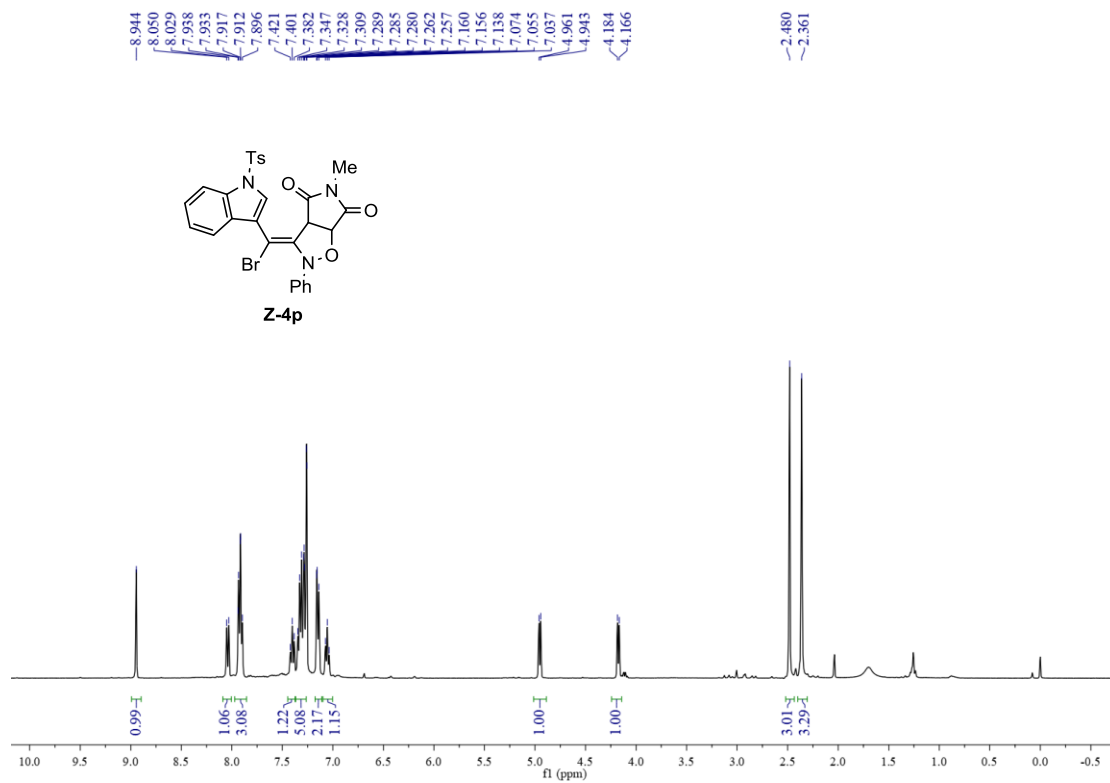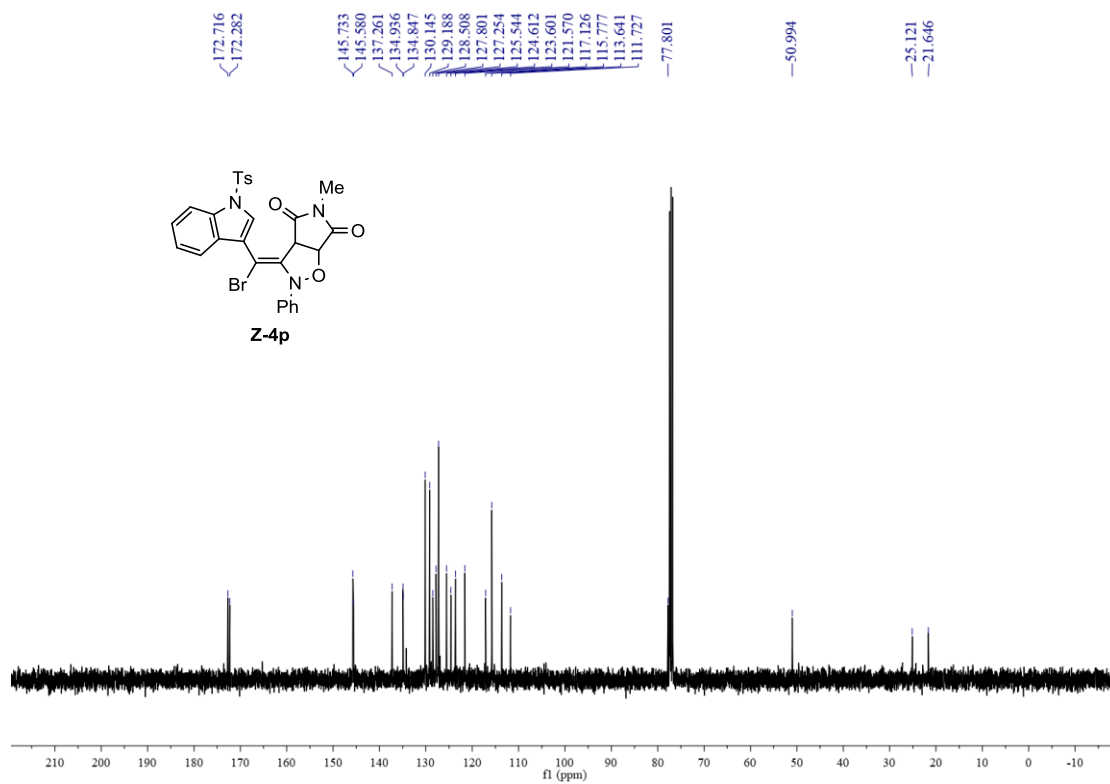

**3-(bromo(furan-3-yl)methylene)-5-methyl-2-phenyltetrahydro-4H-pyrrolo[3,4-d]isoxazole-4,6(5H)-dione (4q)**

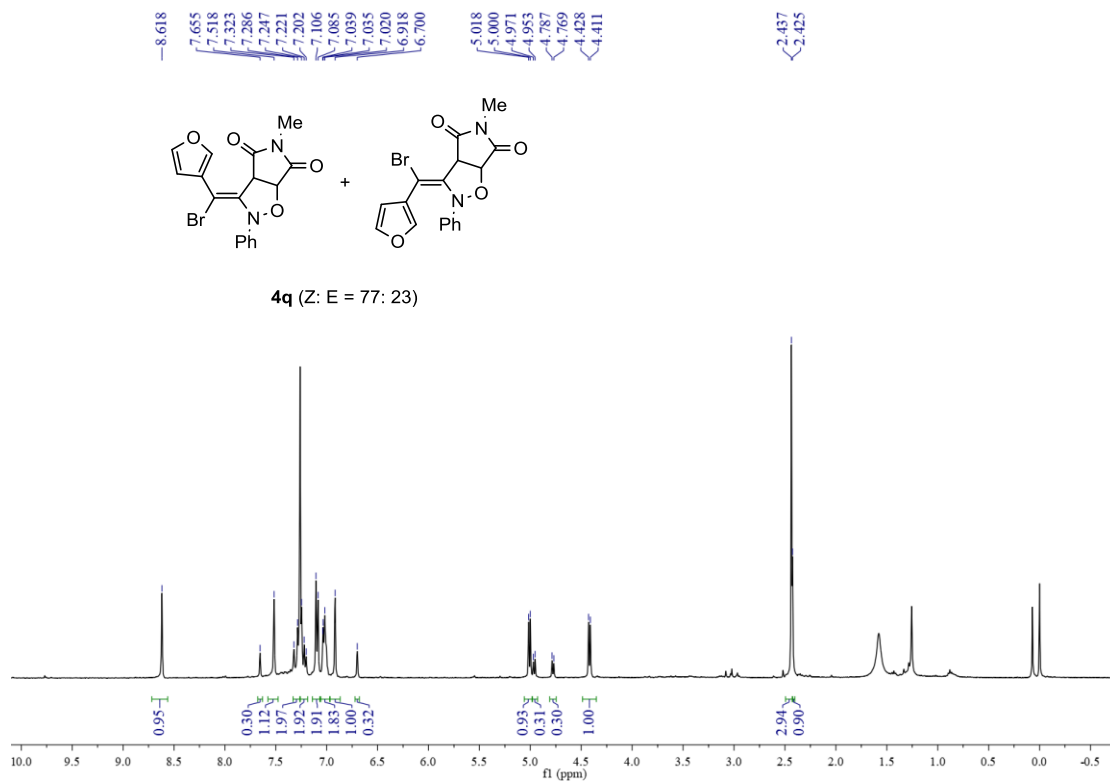

**4q** (Z: E = 77: 23)

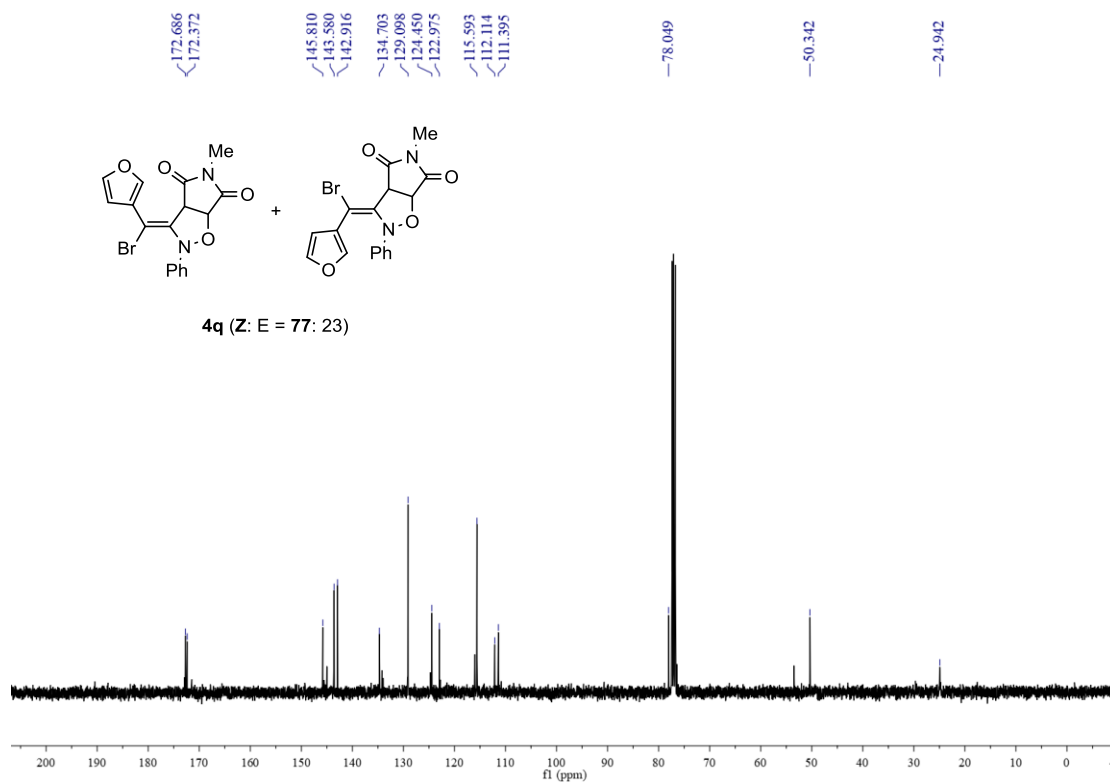

**4q** (Z: E = 77: 23)

**3-(iodo(phenyl)methylene)-5-methyl-2-phenyltetrahydro-4H-pyrrolo[3,4-d]isoxazole-4,6(5H)-dione**  
**(4s)**

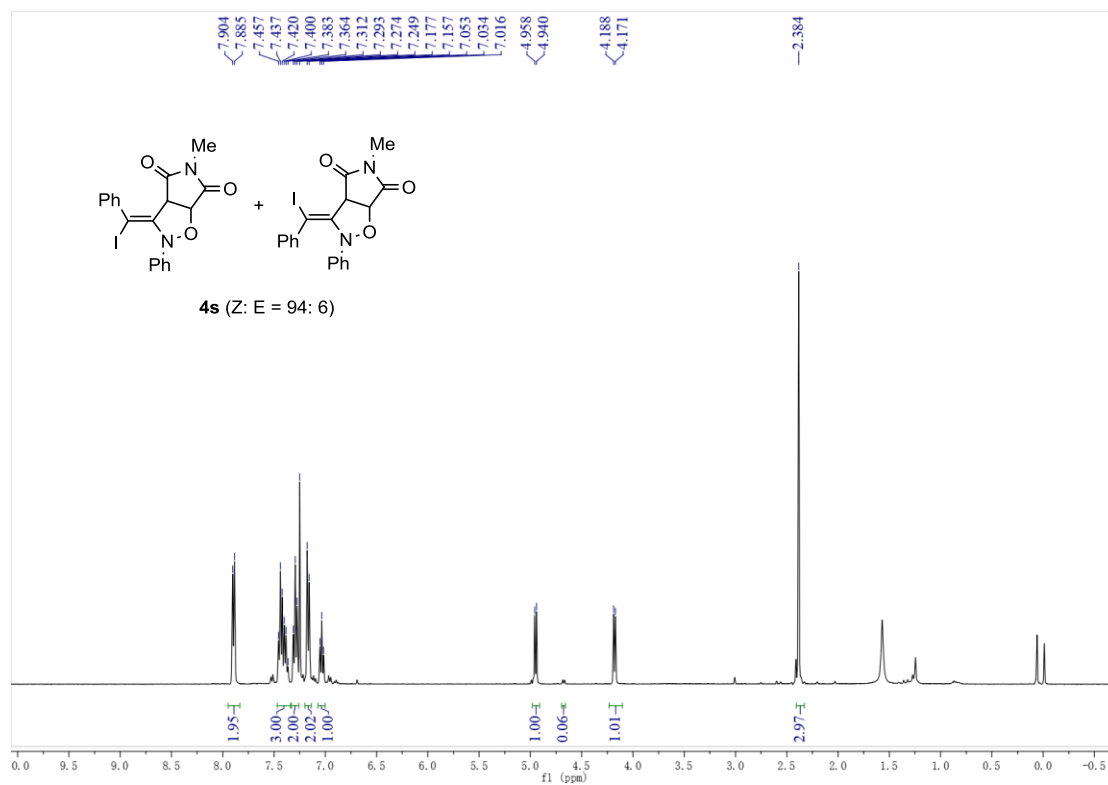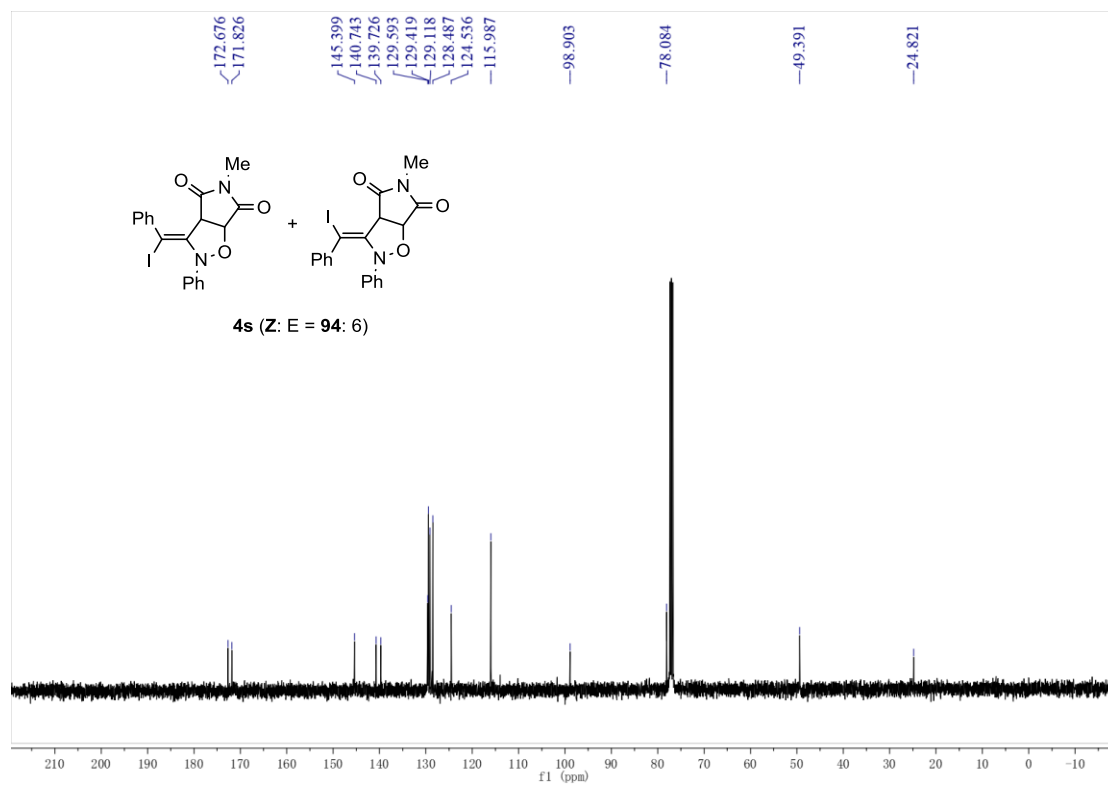

**(Z)-3-(iodo(*m*-tolyl)methylene)-5-methyl-2-phenyltetrahydro-4H-pyrrolo[3,4-d]isoxazole-4,6(5H)-dione (Z-4t)**

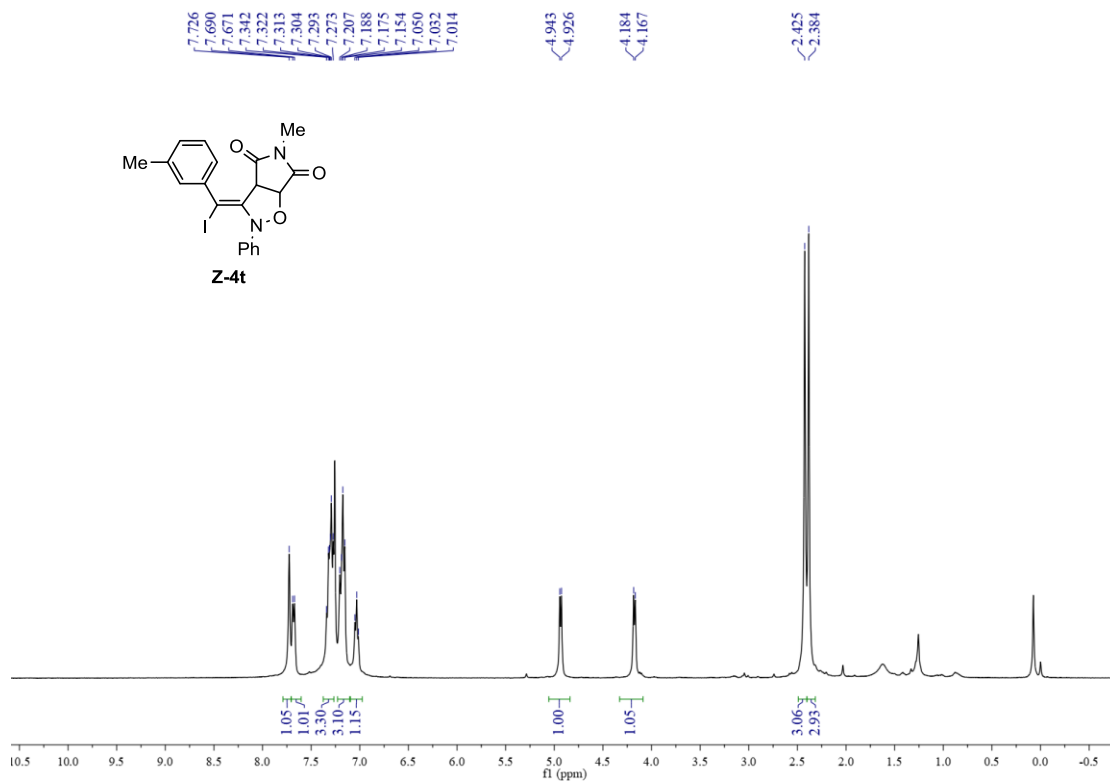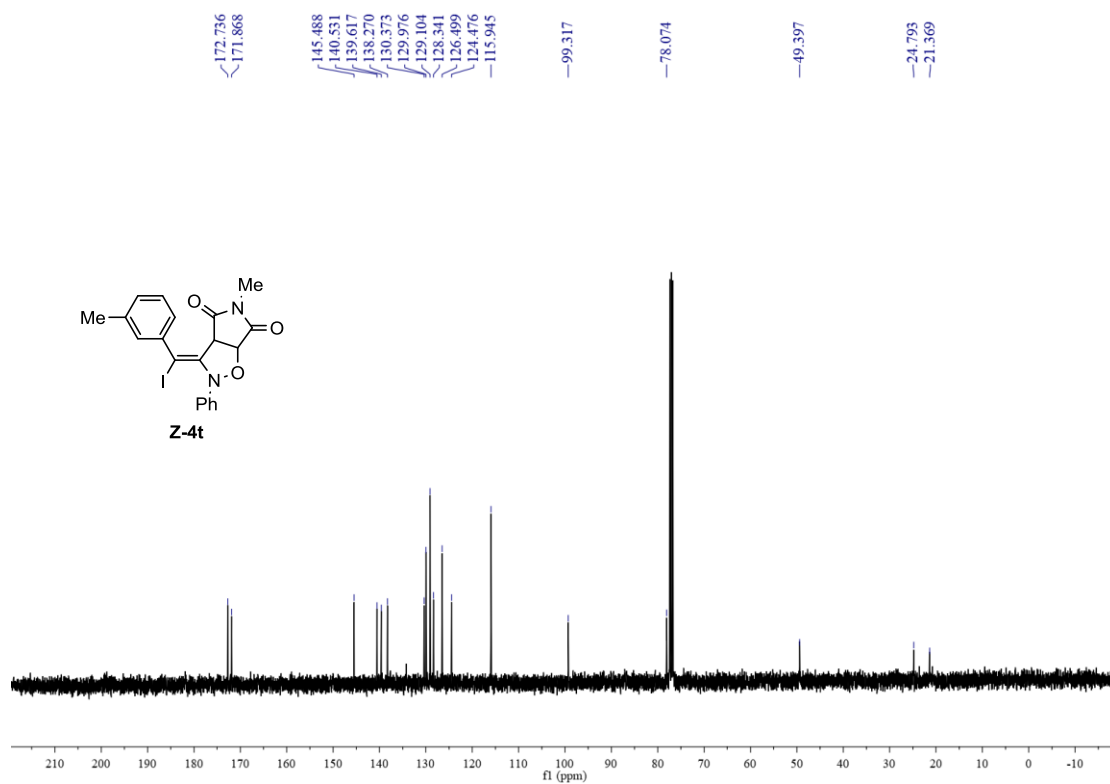

**3-(iodo(phenyl)methylene)-2,5-diphenyltetrahydro-4H-pyrrolo[3,4-d]isoxazole-4,6(5H)-dione (4u)**

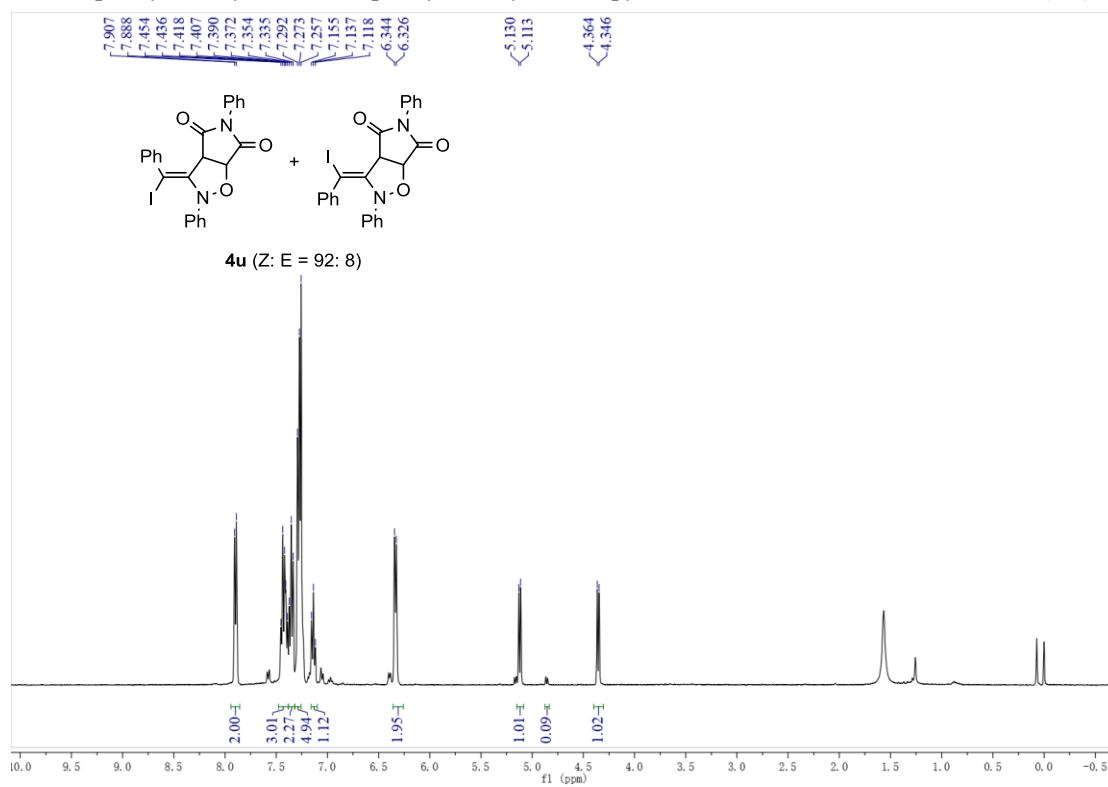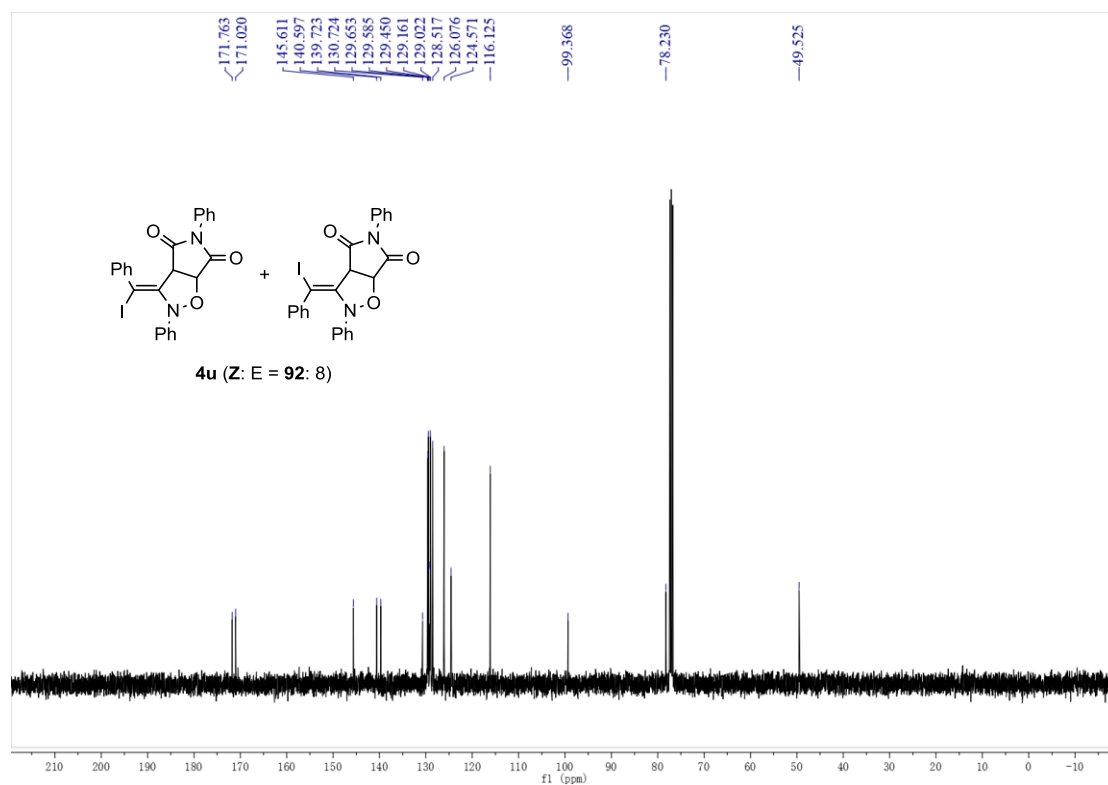

**3-(bromo(phenyl)methylene)-2-(4-bromophenyl)-5-methyltetrahydro-4H-pyrrolo[3,4-d]isoxazole-4,6(5H)-dione (4w)**

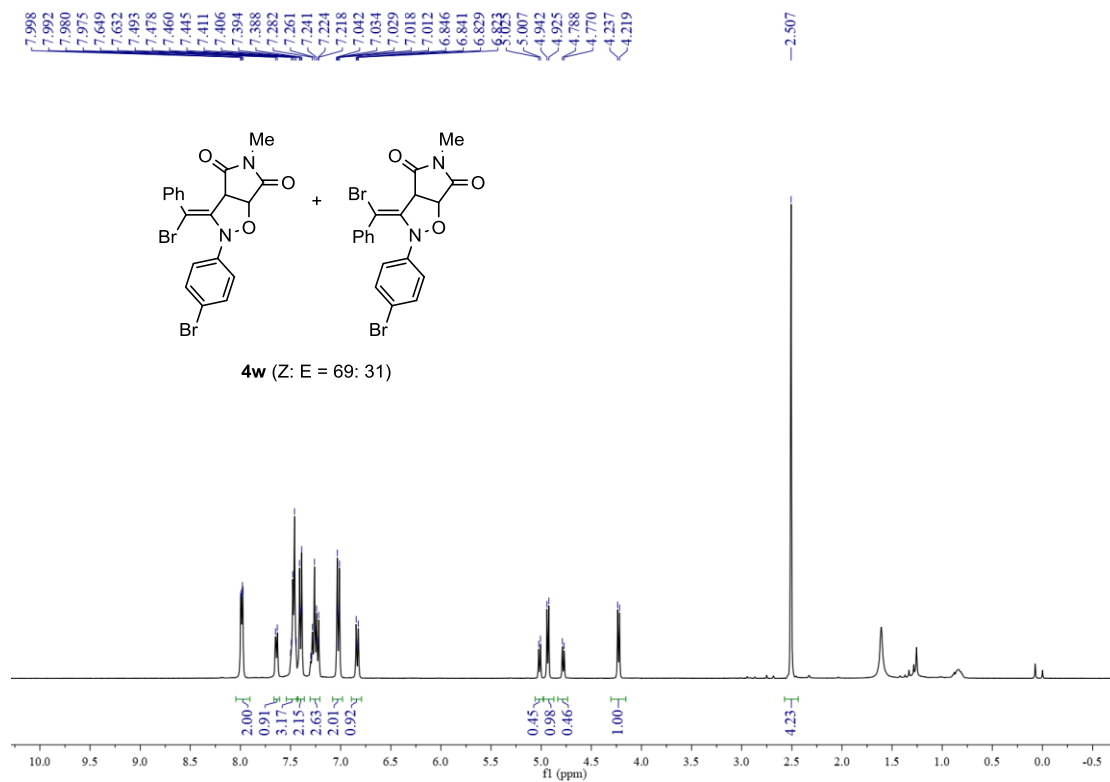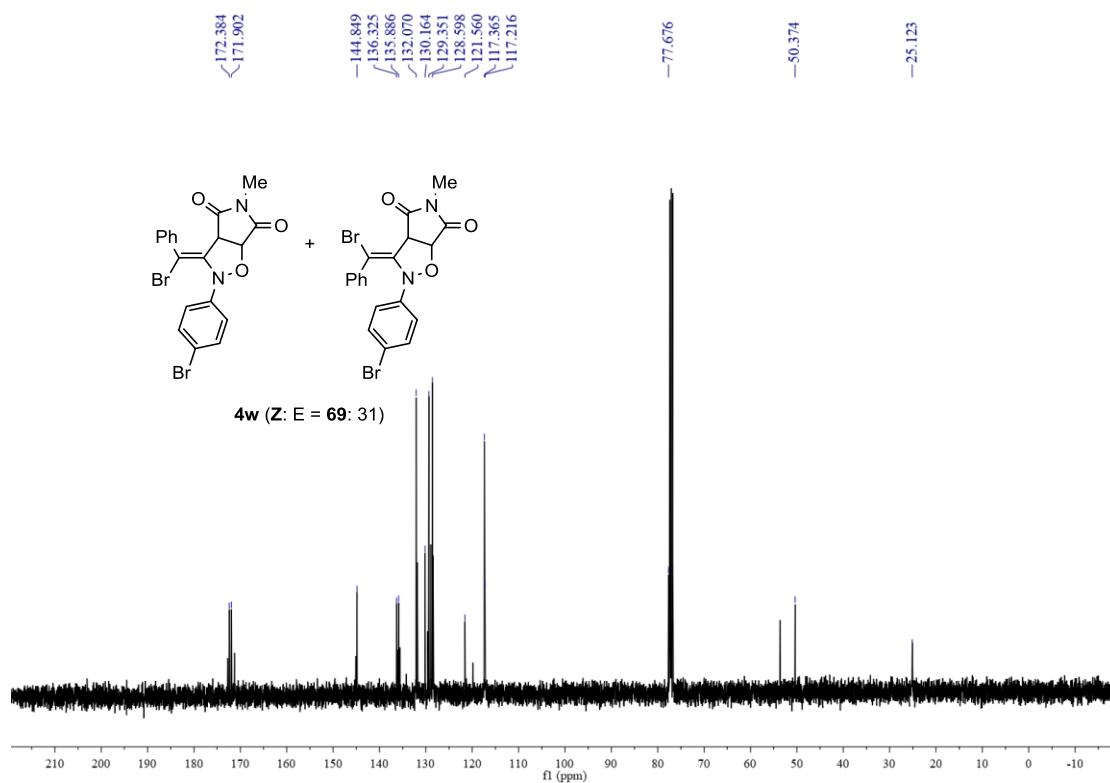

**4-(3-(bromo(phenyl)methylene)-5-methyl-4,6-dioxohexahydro-2H-pyrrolo[3,4-d]isoxazol-2-yl)benzo nitrile (4x)**

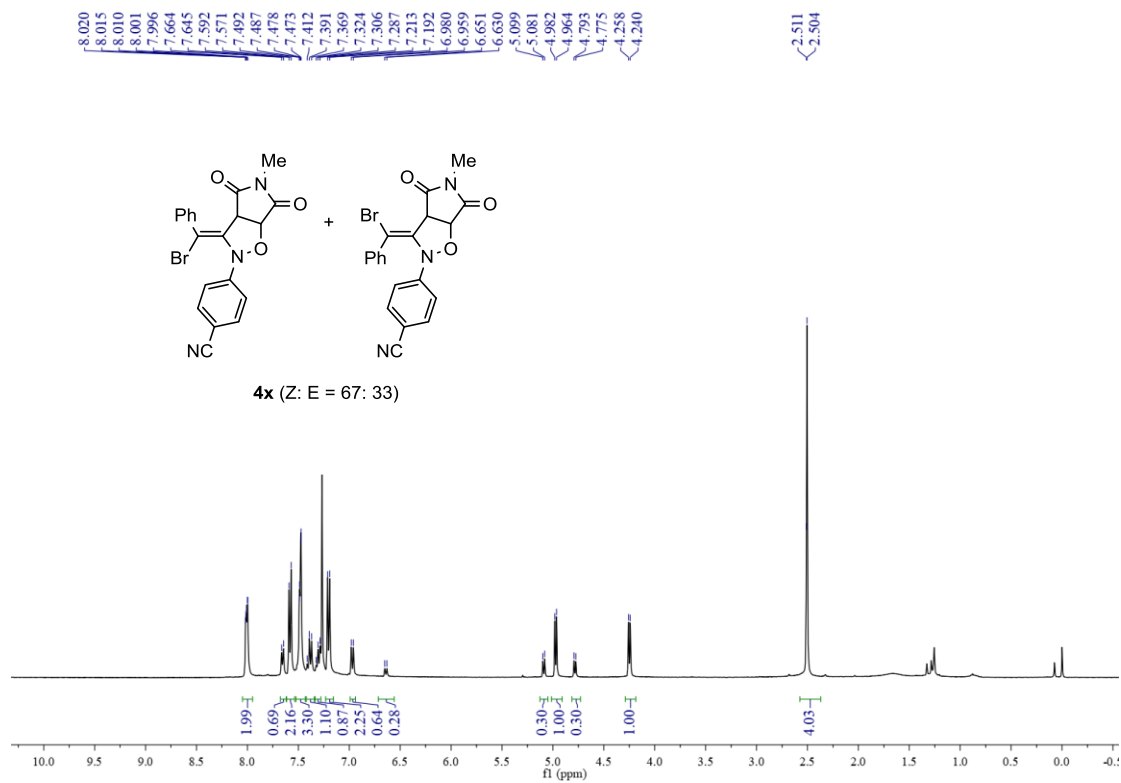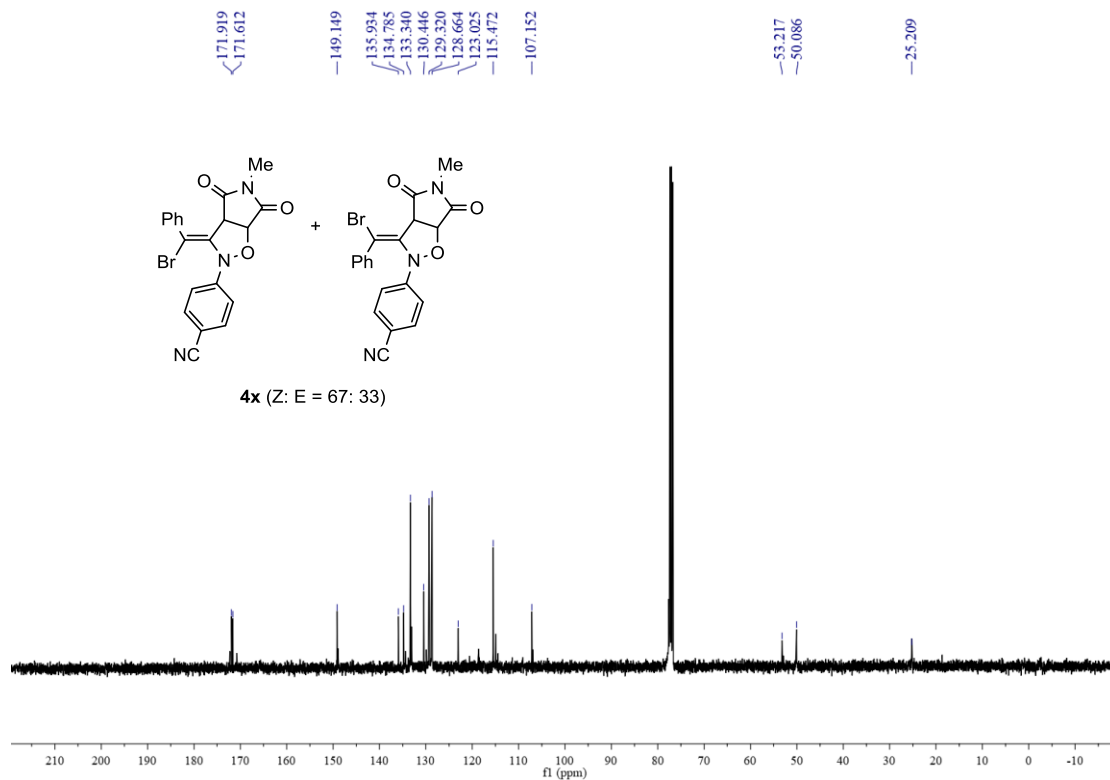



**(Z)-3-(bromo(phenyl)methylene)-5-methyl-2-(p-tolyl)tetrahydro-4H-pyrrolo[3,4-d]isoxazole-4,6(5H)-dione (Z-4y)**

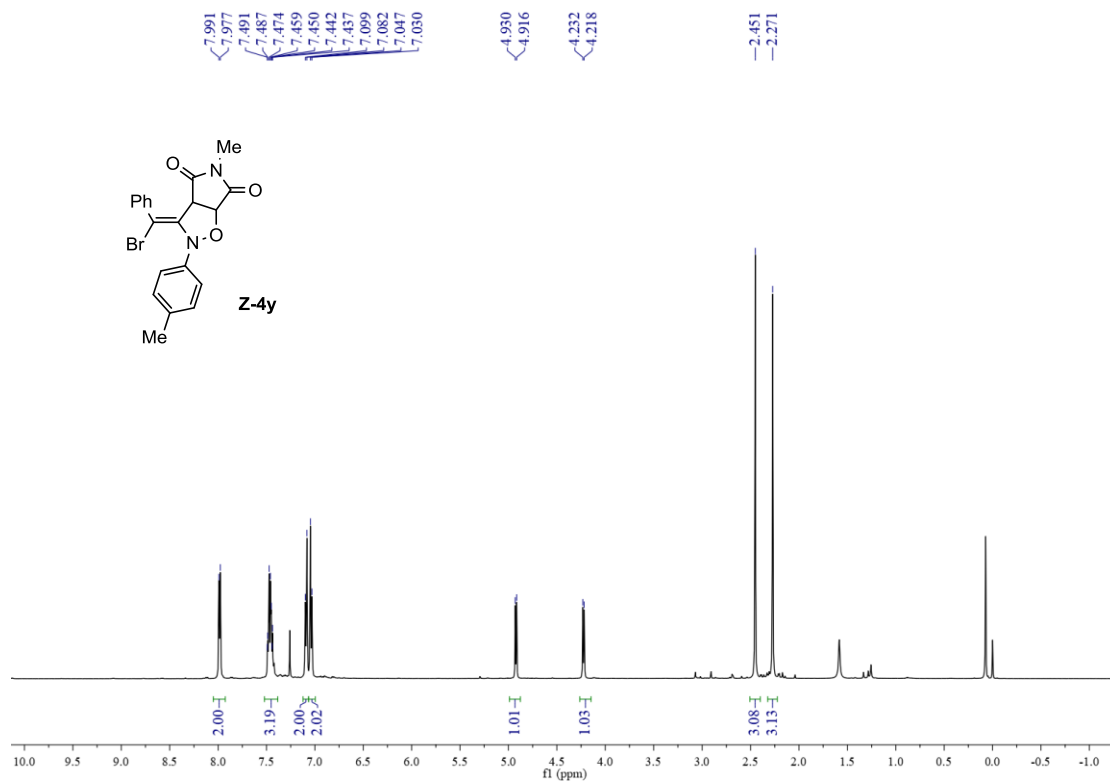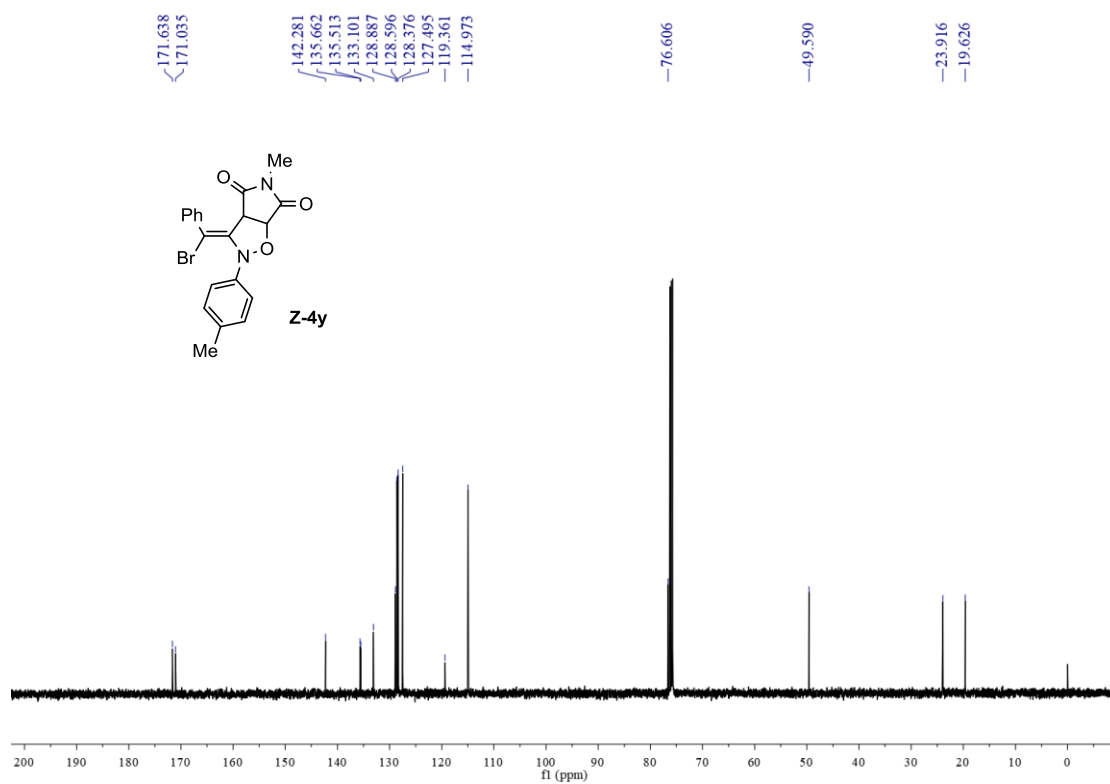

**(Z)-3-hydroxy-1-methyl-4-(2-phenyl-1-(phenylamino)ethylidene)pyrrolidine-2,5-dione (5a)**

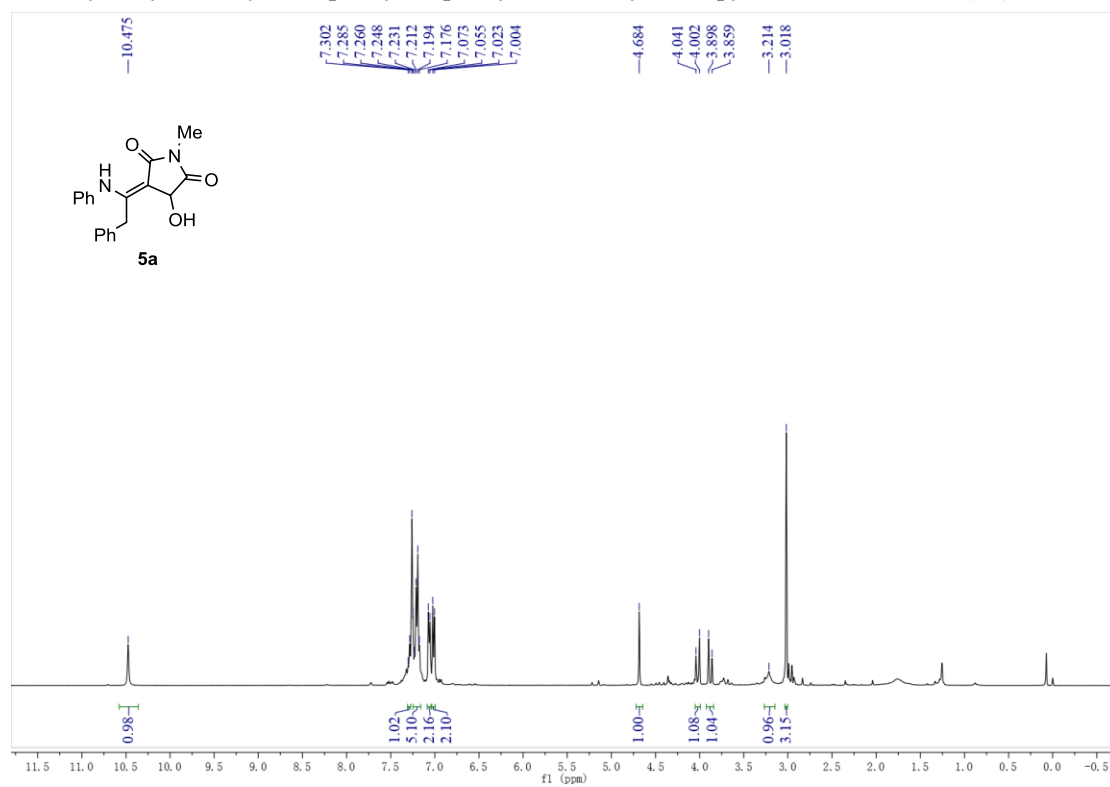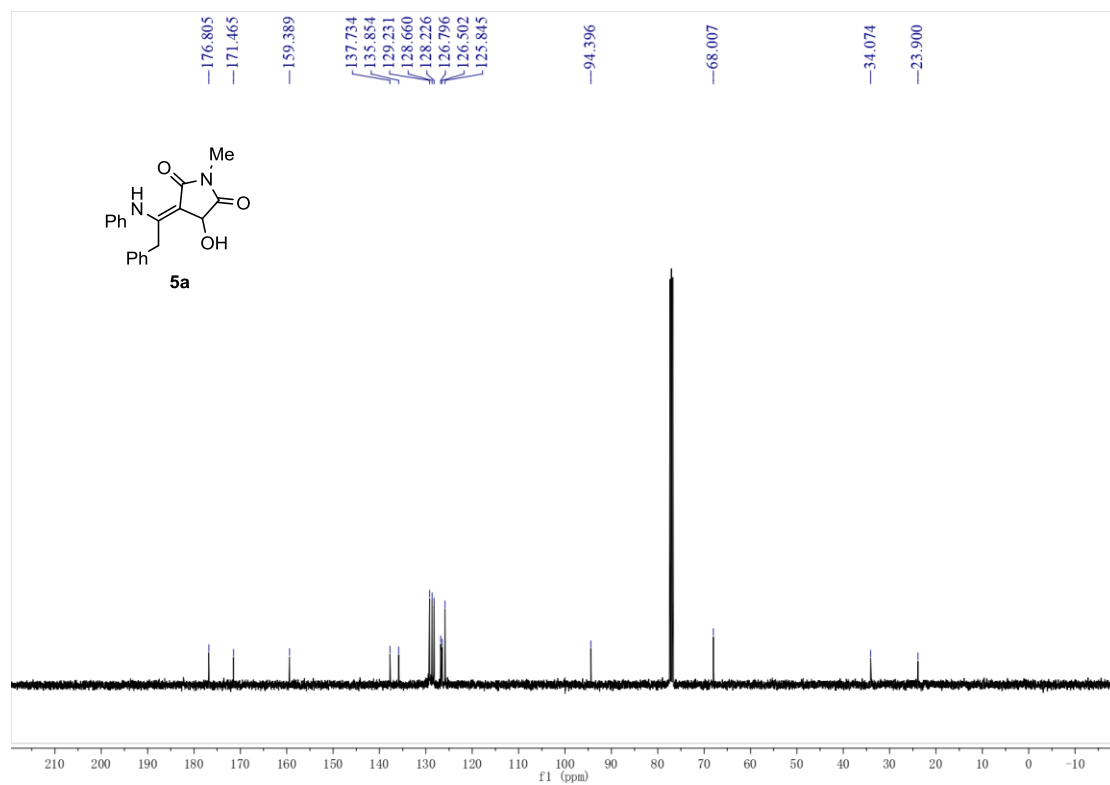

**3-(2-(4-bromophenyl)-1-(phenylamino)ethylidene)-4-hydroxy-1-methylpyrrolidine-2,5-dione (5h)**

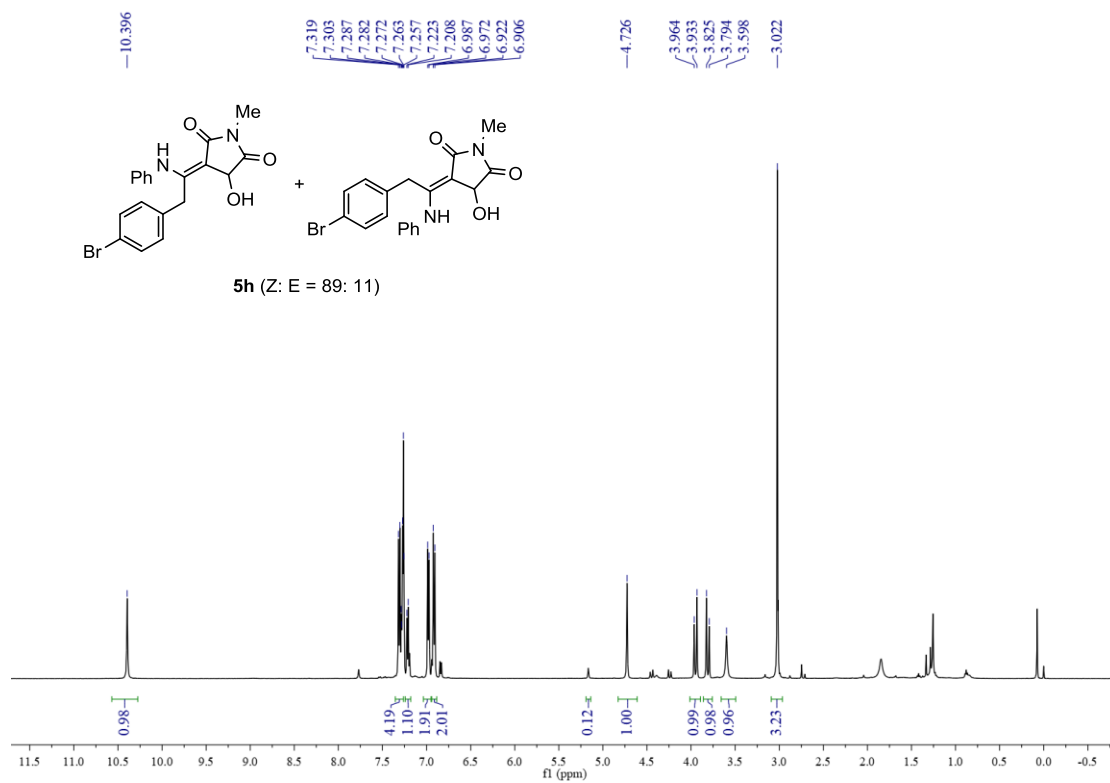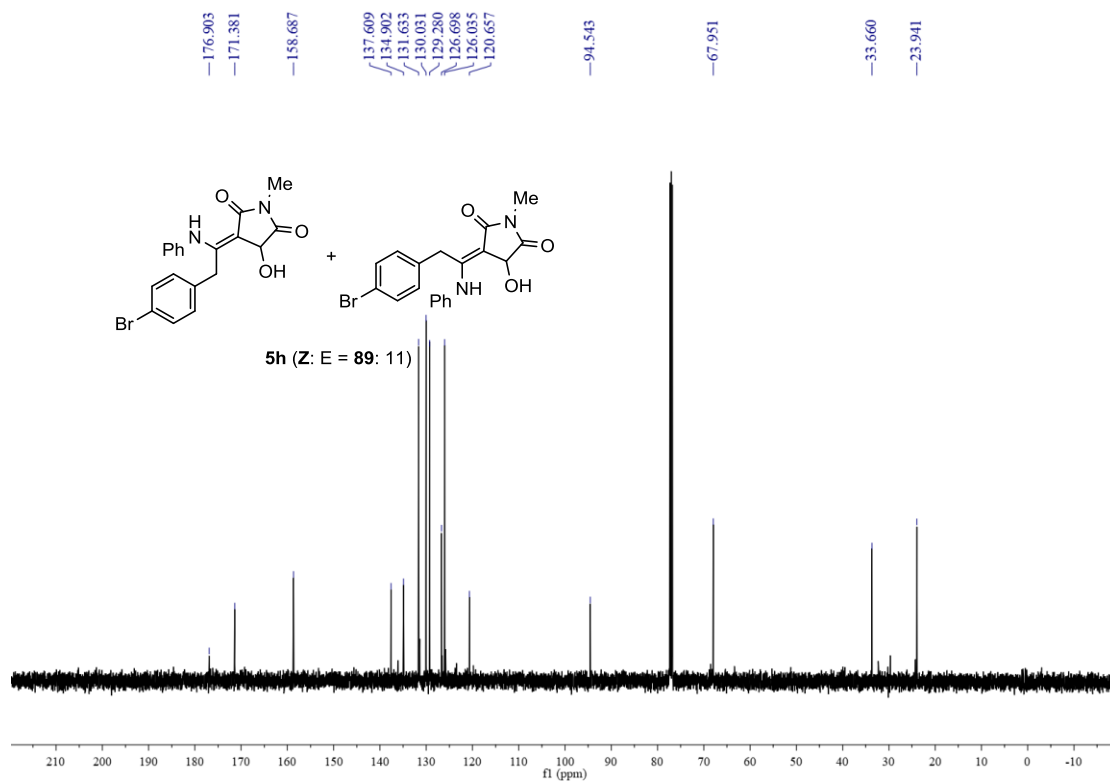

**3-(2-bromo-2-phenyl-1-(phenylamino)vinyl)-4-hydroxy-1-methylpyrrolidine-2,5-dione (6)**

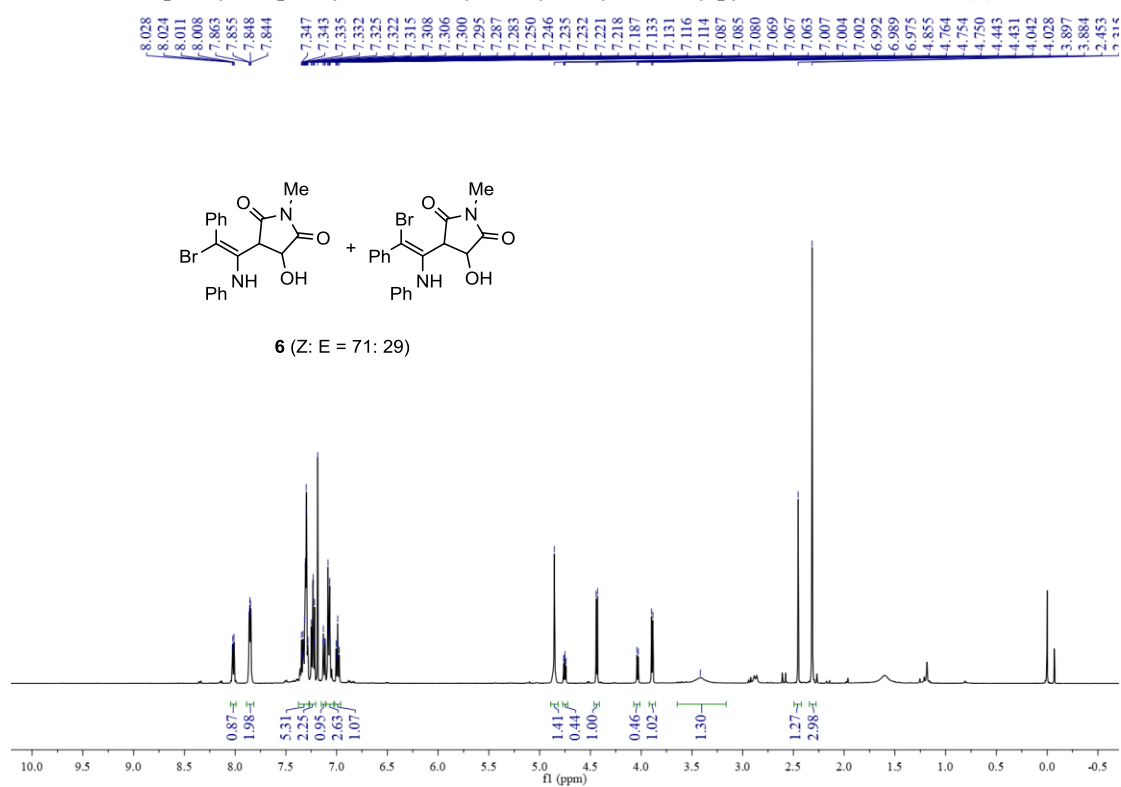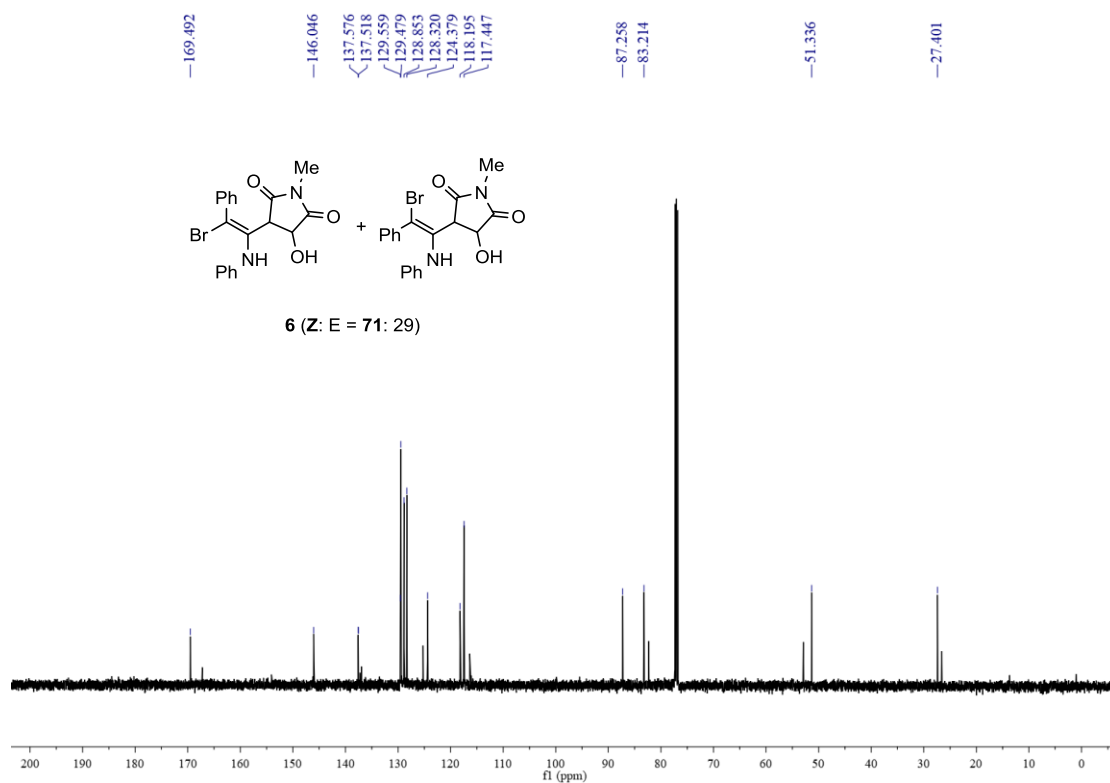

Supplement: d1ob00421b1.pdf [file d1ob00421b1.pdf]
